# Supplementary material for: Race and Ethnic Background in Parkinson’s Disease: A Literature Review and Risk Factor Analysis
Source: Research Square preprint supplement (doi:10.21203/rs.3.rs-3389274/v1), 2023-10-05
Supplement: Supplementary file 1 [file 16de12318b3eb33300aba33e.xlsx]

## Sheet: Review of Articles
#	Title	Author(s)	Year	Keyword(s)	Region of study	Was race/ethnicity mentioned in the abstract?	Was race/ethnicity accounted for in the data?	How were racial/ethnic data reported?	Racial/ethnical breakdown of participants in this study	Sex breakdown of participants in this study	Did the authors consider race/ethnicity in their results?	If yes, did they provide an explanation for how or why race or ethnicity was important?	If no, did the authors explain why they opted to omit race as a factor?	Authors’ definition of race or ethnicity (if available)	ANY NOTES
1	Parkinson’s disease, smoking, and family history	Elbaz, A Manubens-Bertran, J M Baldereschi, M Breteler, M M Grigoletto, F Lopez-Pousa, S Dartigues, J F Alpérovitch, A Rocca, W A Tzourio, C	2000	Parkinson’s disease · Family history · Smoking · Interaction · Case-control	Europe	No	No	NA	NA	Controls: 137M, 160F, Cases: 57 M, 70F	No	NA	No		Case Control Study
2	Association of coffee and caffeine intake with the risk of Parkinson disease.	Ross, G W Abbott, R D Petrovitch, H Morens, D M Grandinetti, A Tung, K H Tanner, C M Masaki, K H Blanchette, P L Curb, J D Popper, J S White, L R	2000		North America	Yes (as target group of study is a racial/ethnic group	Yes (as target group of study is a racial/ethnic group)	Target group of study is a racial/ethnic group	Japanese-Americans	All men, n= 8004 (2 excluded)	Yes (as target group of study is a racial/ethnic group	Yes and target group of study is a racial/ethnic group	NA		"Generalizations to […] other ethnic groups cannot be made with certainty […] risk factor profiles are similar in ethnic groups worldwide"
3	Polymorphisms of the parkin gene in sporadic Parkinson's disease among Chinese in Taiwan	Hu, C J Sung, S M Liu, H C Lee, C C Tsai, C H Chang, J G	2000		Asia	Yes (as target group of study is a racial/ethnic group	Yes (as target group of study is a racial/ethnic group)	Target group of study is a racial/ethnic group	Taiwanese - ethnic Chinese	cases(n=92): 49M and 43F, controls(n=98): sex matched	Yes (as target group of study is a racial/ethnic group	Yes and target group of study is a racial/ethnic group	NA
4	Agricultural work and the risk of Parkinson's disease in Denmark, 1981-1993.	Tüchsen, F Jensen, A A	2000	agricultural work; agriculture; Denmark; epidemiology; farming; horticulture; human; Parkinson’s disease; pesticide; risk; rural living	Europe	No	No	NA	NA	90,430M and 38,505F	No	NA	No
5	Risk factors of Parkinson's disease in Indian patients.	Behari, M Srivastava, A K Das, R R Pandey, R M	2001	Risk factors; Parkinson’s disease; Bidi smoking; Neurodegeneration; Rural living; Pets exposure	Asia	No	Yes (as an integral part of the data analyses)	Each ethnoracial group was analysed distinctly	Aryans and Non-Aryans	Controls: 271 M, 106F, Cases: 301 M, 76F	Yes (as factor)	No	NA	Defined as Aryan and Non-Aryans based on criteria in another article
6	Pilot study of prevalence of Parkinson's disease in Australia.	Chan, D K Dunne, M Wong, A Hu, E Hung, W T Beran, R G	2001		Oceania/Australasia	No	No	NA	NA	527 from random community sampling (M1: F1.2) 203 residents in aged care facilities (M2.44: F1)	No	NA	No
7	A case-control study of Parkinson's disease in urban population of southern Israel.	Herishanu, Y O Medvedovski, M Goldsmith, J R Kordysh, E	2001		Asia	No	No	NA	NA	93 cases and sex matched controls, 93 controls	No	NA	No
8	Cigarette smoking and the incidence of Parkinson's disease in two prospective studies.	Hernán, M A Zhang, S M Rueda-deCastro, A M Colditz, G A Speizer, F E Ascherio, A	2001		North America	No	No	NA	NA	M: 51529 and F: 121700	No	NA	No
9	Risk factors for parkinson's disease: the leisure world cohort study.	Paganini-Hill, A	2001		North America	No	Yes (as descriptives of the sample)	Described and combined with the total sample	mostly white	total: 13,979 F:2/3 M:1/3	No	NA	No
10	Complete genomic screen in Parkinson disease: evidence for multiple genes.	Scott, W K Nance, M A Watts, R L Hubble, J P Koller, W C Lyons, K Pahwa, R Stern, M B Colcher, A Hiner, B C Jankovic, J Ondo, W G Allen, F H Jr Goetz, C G Small, G W Masterman, D Mastaglia, F Laing, N G Stajich, J M Slotterbeck, B Booze, M W Ribble, R C Rampersaud, E West, S G Gibson, R A Middleton, L T Roses, A D Haines, J L Scott, B L Vance, J M Pericak-Vance, M A	2001		Other	No	Yes (as descriptives of the sample)	Described and combined with the total sample	All individuals were white	Not specifed	No	NA	No
11	Midlife adiposity and the future risk of Parkinson's disease.	Abbott, R D Ross, G W White, L R Nelson, J S Masaki, K H Tanner, C M Curb, J D Blanchette, P L Popper, J S Petrovitch, H	2002		North America	No	Yes (as descriptives of the sample)	Described and combined with the total sample	Japanese ancestry	All men ( 7990 - excluded 16)	No	NA	No
12	Cross-sectional study of the prevalence of Parkinson's disease in the Kibbutz movement in Israel.	Anca, M Paleacu, D Shabtai, H Giladi, N	2002		Asia	No	Yes (as descriptives of the sample)	NA	have ethn not reported	PD cases: 105(M) and 75(F)	No	NA	No
13	The Cys282Tyr polymorphism in the HFE gene in Australian Parkinson's disease patients.	Buchanan, D D Silburn, P A Chalk, J B Le Couteur, D G Mellick, G D	2002	Parkinson’s disease; Iron; HFE; Cys282Tyr; Case-control; Single nucleotide polymorphism	Oceania/Australasia	No	Yes (as an integral part of the data analyses)	Each ethnoracial group was analysed distinctly	All participants were from European Caucasian descent. Cohort 1: 78% controls and 88% cases British ancestry. Cohort 2: 90% controls and 87% cases British Ancestry	Controls: 234 M, 251F. Cases: 219M, 219 F	Yes (as factor)	Yes	NA		Incoprotated ethnic background to avoid biases and traditional problems od case-control studies. The analysis seperated by ethnicicty game same results as non-seperated
14	Parkinson's disease risks associated with cigarette smoking, alcohol consumption, and caffeine intake	Checkoway, Harvey Powers, Karen Smith-Weller, Terri Franklin, Gary M Longstreth, W T Jr Swanson, Phillip D	2002	caffeine; coffee; neuroprotective agents; Parkinson disease; smoking; tea	North America	No	Yes (as a control variable/covariate the data analyses)	All ethnoracial groups other than White were considered together	Control: Non-hispanic caucasians 92% and 8% other. Cases: Non-hispanic caucasians 93% and 7% other	Controls: 225M, 122F. Cases:131M, 79F	Yes (as factor)	No	NA		OR adjusted for ethnicity, did not consider significance
15	Diet and Parkinson's disease: a potential role of dairy products in men.	Chen, Honglei Zhang, Shumin M Hernán, Miguel A Willett, Walter C Ascherio, Alberto	2002		North America	No	No	NA	NA	47,331 men and 88,563 women ( 210 men and 184 PD cases)	No	NA	No
16	Risk tables for parkinsonism and Parkinson's disease.	Elbaz, Alexis Bower, James H Maraganore, Demetrius M McDonnell, Shannon K Peterson, Brett J Ahlskog, J Eric Schaid, Daniel J Rocca, Walter A	2002	Parkinsonism; Parkinson’s disease; Epidemiology; Lifetime risk; Cumulative risk; Competing risks	North America	No	Yes (as descriptives of the sample)	Described and combined with the total sample	Described population as mostly Caucasian	Parkinsonism: 181(M) 183(F) PD: 89(M) 65(F)	No	NA	No		Life tables on hypothetical cohort. Said generalizability is limited as mostly Caucasian
17	Mitochondrial DNA A4336G mutation in Alzheimer's and Parkinson's diseases	García-Lozano, José Raúl Mir, Pablo Alberca, Román Aguilera, Isabel Gil Néciga, Eulogio Fernández-López, Olga Cayuela, Aurelio Núñez-Roldan, Antonio	2002		Europe	No	No	NA	NA	Not specfied	No	NA	No
18	Roles of gender, age at onset and environmental risk in the frequency of CYP2D6-deficient alleles in patients with Parkinson's disease.	Gérard, Nathalie Panserat, Stéphane Lucotte, Gérard	2002		Europe	NA	Yes (as target group of study is a racial/ethnic group)	Target group of study is a racial/ethnic group	All Caucasian	PD cases- M: 54, F: 49	Yes (as target group of study is a racial/ethnic group	No and target group of study is a racial/ethnic group	NA
19	Physical disorders and causes of death in relatives of Alzheimer's disease patients.	Kockler, M Nitardy, A Papassotiropoulos, A Ptok, U Maier, W Heun, R	2002	Alzheimer’s disease; family study; genetic risk factors; cerebrovascular disease; Down’s syndrome;haematological malignancy; Parkinson’s disease	Europe	No	No	NA	NA	Index subjects: 146 patients with AD (50.1%M + 49.9% F), 168 patients with MD (51.8%M + 48.2%F) and 136 control subjects ( 49.8%M + 50.2% F) 2964 first degree relatives of the index subjects ( no sex breakdown included)	No	NA	No
20	Association between genetic polymorphism of angiotensin-converting enzyme gene and Parkinson's disease.	Lin, Juei-Jueng Yueh, Kuo-Chu Chang, Dar-Cheng Lin, Shinn-Zong	2002	Angiotensin-converting enzyme; Genetic susceptibility; Genetic polymorphism; Parkinson’s disease	Asia	No	Yes (as descriptives of the sample)	Described and combined with the total sample	All chinese ancestry	PD cases: 127 (72M/ 55 F) Controls: 198 (110M/ 88F)	Yes (as factor)	Yes	NA		Compared their frequency of Chinese to Caucasians in discussion
21	Epidemiologic study of 203 sibling pairs with Parkinson's disease: the GenePD study.	Maher, N E Golbe, L I Lazzarini, A M Mark, M H Currie, L J Wooten, G F Saint-Hilaire, M Wilk, J B Volcjak, J Maher, J E Feldman, R G Guttman, M Lew, M Waters, C H Schuman, S Suchowersky, O Lafontaine, A L Labelle, N Vieregge, P Pramstaller, P P Klein, C Hubble, J Reider, C Growdon, J Watts, R Montgomery, E Baker, K Singer, C Stacy, M Myers, R H	2002		Other	No	No	NA	NA	PD cases:229(M) and 167(F)	No	NA	No
22	Lack of association between an estrogen receptor 1 gene polymorphism and Parkinson's disease with dementia.	Mattila, K M Rinne, J O Röyttä, M Laippala, P Lehtimäki, T	2002	: Parkinson's disease; dementia; estrogen receptor 1; gene; polymorphism	Europe	Yes (as target group of study is a racial/ethnic group	Yes (as target group of study is a racial/ethnic group)	Target group of study is a racial/ethnic group	All of same ethnic origin from Western part of Finland	Control: 33 M, 26 F. Cases: 21 M, 20 F	Yes (as target group of study is a racial/ethnic group	Yes and target group of study is a racial/ethnic group	NA		compared against Janpanese populaton data
23	Incidence of Parkinson disease in Wakayama, Japan.	Morioka, Seiji Sakata, Kiyomi Yoshida, Sohei Nakai, Ekini Shiba, Mitsuru Yoshimura, Noriko Hashimoto, Tsutomu	2002	Parkinson disease, incidence, Wakayama, mail survey	Asia	No	No	NA		75 M and 108 F cases	No	NA	No
24	Occupational exposure to magnetic fields in case-referent studies of neurodegenerative diseases.	Noonan, Curtis W Reif, John S Yost, Michael Touchstone, Jennifer	2002	Alzheimer’s disease; amyotrophic lateral sclerosis; case-referent study; electrical occupation; job-exposure matrix; magnetic fields; neurodegenerative disease; occupational exposure; Parkinson’s disease	North America	No	Yes (as a control variable/covariate the data analyses)	All ethnoracial groups other than White were considered together	For PD Controls: Non-Hispanic white 1441 and 36 Others. Cases: Non-white hispanics: 1455 and 22 Others.	All male	Yes (as factor)	No	NA
25	Increased risk of Parkinson's disease after depression: a retrospective cohort study.	Schuurman, A G van den Akker, M Ensinck, K T J L Metsemakers, J F M Knottnerus, J A Leentjens, A F G Buntinx, F	2002		Europe	No	No	NA	NA	Cases: 463(M) and 895(F) Controls: 33,031(M) and 34,539(F)	No	NA	No
26	Prevalence of Parkinson's disease in Estonia.	Taba, Pille Asser, Toomas	2002	Parkinson's disease; epidemiology;prevalence	Europe	Yes (as target group of study is a racial/ethnic group	Yes (as target group of study is a racial/ethnic group)	NA	NA	Population: 71,139(46%)M, 82,101(54%)F and 270 PD patients:88 men and 182FD	Yes (as target group of study is a racial/ethnic group	Yes and target group of study is a racial/ethnic group	NA		Compared results with European areas
27	A common NURR1 polymorphism associated with Parkinson disease and diffuse Lewy body disease.	Zheng, Kangni Heydari, Bobak Simon, David K	2003		North America	No	Yes (as descriptives of the sample)	Described and combined with the total sample	153 white, 2 Arabian, 2 African, 2 Asian	control: 41(M) and 42(F) Cases: 79(M) and 22F)	No	NA	No
28	Prevalence of Parkinson's disease and related disorders in the elderly population of greater Beijing, China.	Zhang, Zhen-Xin Anderson, Dallas W Huang, Jue-Bin Li, Hui Hong, Xia Wei, Jing Yang, En-Li Maraganore, Demetrius M	2003	epidemiology; Parkinson’s disease; prevalence	Asia	No	Yes (as descriptives of the sample)	NA	Looking at Chinease population but questionaire had ethnicity question (results not reported)	Parkinsonism cases: 57(M) and 53(W) Population: 1207(M) and 1554(W)	No	NA	No		Ended with further research needed to explore ethnicity etiology
29	Prospective study of phobic anxiety and risk of Parkinson's disease.	Weisskopf, Marc G Chen, Honglei Schwarzschild, Michael A Kawachi, Ichiro Ascherio, Alberto	2003	Parkinson’s disease; anxiety; prospective stud-ies; epidemiology; risk factors	North America	No	Yes (as descriptives of the sample)	Described and combined with the total sample	All primarily Caucasian adn of European ancestry	All male ( n=35,815)	No	NA	No
30	Mitochondrial polymorphisms significantly reduce the risk of Parkinson disease.	van der Walt, Joelle M Nicodemus, Kristin K Martin, Eden R Scott, William K Nance, Martha A Watts, Ray L Hubble, Jean P Haines, Jonathan L Koller, William C Lyons, Kelly Pahwa, Rajesh Stern, Matthew B Colcher, Amy Hiner, Bradley C Jankovic, Joseph Ondo, William G Allen, Fred H Jr Goetz, Christopher G Small, Gary W Mastaglia, Frank Stajich, Jeffrey M McLaurin, Adam C Middleton, Lefkos T Scott, Bur…	2003		North America	Yes (as target group of study is a racial/ethnic group	Yes (as target group of study is a racial/ethnic group)	Target group of study is a racial/ethnic group	All white	57% M, 43% F, total= 949 cases: 63%(M) and 37%(F), n= 609 Controls: 44%(M) and 56%(W), n=340	Yes (as target group of study is a racial/ethnic group	Yes and target group of study is a racial/ethnic group	NA		allele frequency in diffferent ethnicity groups Note that fidings only apply to target population
31	Dose-dependent protective effect of coffee, tea, and smoking in Parkinson's disease: a study in ethnic Chinese.	Tan, E-K Tan, C Fook-Chong, S M C Lum, S Y Chai, A Chung, H Shen, H Zhao, Y Teoh, M L Yih, Y Pavanni, R Chandran, V R Wong, M C	2003	Coffee; Tea; Smoking; Parkinson’s disease; Chinese	Asia	Yes (as target group of study is a racial/ethnic group	Yes (as target group of study is a racial/ethnic group)	Target group of study is a racial/ethnic group	All chinese ethnic group	200 case control pairs (sex matched) 115(M) and 85(W) pairs	Yes (as target group of study is a racial/ethnic group	Yes and target group of study is a racial/ethnic group	NA		Mentioned sinc eit was only ethnic chinese individuals racial differnce confound was decreased
32	Lower risk of Parkinson's disease in an admixed population of European and Indian origins.	Ragothaman, Mona Murgod, Uday A Gururaj, Gopalkrishna Kumaraswamy, Subbakrishna D Muthane, Uday	2003	admixed populations; etiopathogenesis; ethnic-ity; genetics; Parkinson’s disease	Asia	Yes (as factor)	Yes (as an integral part of the data analyses)	Each ethnoracial group was analysed distinctly	83% Indians, 17% Anglo Indians 493 residents, 409 indians, 84 Angloindians. 84 PD cases- 80 indians, 4 angloindians	Indians: 136 M, 273 F. AngloIndians: 34 M, 50 F	Yes (as factor)	Yes	NA	Defined Anglo Indians as those who have lived in India but have a male ancestor European descent.
33	Parkinson's disease risks associated with dietary iron, manganese, and other nutrient intakes.	Powers, K M Smith-Weller, T Franklin, G M Longstreth, W T Jr Swanson, P D Checkoway, H	2003		North America	No	Yes (as a control variable/covariate the data analyses)	All ethnoracial groups other than White were considered together	Non-Hispanic White: control: 92.5%, Cases 94.4% vs Other: control:7.5% , cases: 5.6%	cases: n=250 ( 62.4%M and 37.6%W), controls: n=388 (62.1%M and 37.9%W)	Yes (as factor)	No	NA
34	Familial aggregation of early- and late-onset Parkinson's disease.	Marder, Karen Levy, Gilberto Louis, Elan D Mejia-Santana, Helen Cote, Lucien Andrews, Howard Harris, Juliette Waters, Cheryl Ford, Blair Frucht, Steven Fahn, Stanley Ottman, Ruth	2003		North America	No	Yes (as a control variable/covariate the data analyses)	Each ethnoracial group was analysed distinctly	Control: White 84.8%, African American 3.7%, Hispanic 10.5%, Other 1%. Cases: White 80.5%, African Americans 2.1%, Hispanic 15%, Other 2.5%	Controls: 53.5% M, 46.5% F. (n=409) Cases: 58.9% M, 41.1% F (n=487)	Yes (as factor)	Yes	NA		Participants and non-participants did not differ by ethnicity. (didn't mention controls). Mentioned that ethnicity was important to consider to eliminate confound
35	S18Y polymorphism in the UCH-L1 gene and Parkinson's disease: evidence for an age-dependent relationship.	Elbaz, Alexis Levecque, Clotilde Clavel, Jacqueline Vidal, Jean-Sébastien Richard, Florence Corrèze, Jean-René Delemotte, Bernard Amouyel, Philippe Alpérovitch, Annick Chartier-Harlin, Marie-Christine Tzourio, Christophe	2003	Parkinson’s disease; UCH-L1; case-control; ageat onset; interaction	Europe	No	No	NA	NA	Control: 59 % (289) M, 41% F. (n=488) Cases: 57% M (119), 43% F (n=209)	No	NA	No		Mentioned that ethnicity should be considered and could result in discrepancies in the data
36	Genetic and environmental risk factors and their interactions for Parkinson's disease in a Chinese population.	Chan, D K Y Mellick, G D Hung, W T Woo, J	2003		Asia	Yes (as target group of study is a racial/ethnic group	Yes (as target group of study is a racial/ethnic group)	Target group of study is a racial/ethnic group	Chinese population	Cases: 101(F) and 114(M) Controls: 142(F) and 171(M)	Yes (as target group of study is a racial/ethnic group	Yes and target group of study is a racial/ethnic group	NA		Described chinese with other ethnic groupings. Compared results to caucasians. Dataset breakdown from previously published article (some same authors): Genetic and environmental risk factors for Parkinson’s disease in a Chinese population
37	Strong association between N-acetyltransferase 2 genotype and PD in Hong Kong Chinese.	Chan, D K Y Lam, M K P Wong, R Hung, W T Wilcken, D E L	2003		Asia	Yes (as target group of study is a racial/ethnic group	Yes (as target group of study is a racial/ethnic group)	Target group of study is a racial/ethnic group	Chinese	PD cases: 60M, 39F and Controls: 63M, 63F	Yes (as target group of study is a racial/ethnic group	Yes and target group of study is a racial/ethnic group	NA		Described chinese with other ethnic groupings
38	Neurodegenerative diseases and exposure to pesticides in the elderly.	Baldi, Isabelle Lebailly, Pierre Mohammed-Brahim, Brahim Letenneur, Luc Dartigues, Jean-François Brochard, Patrick	2003	aged; Alzheimer disease; nervous system diseases; occupational exposure; Parkinson disease; pesticides	Europe	No	No	NA	NA	40.2% M, 59.8% F 1222(M) 1670(W)- intial At 5 year follow up 61.2% (W) 38.8%(M)where total= 1507 Cases: 10(M) 14(W) ( beween 5-10 year follow up)	No	NA	No		Didn't mention ethnicity called their population French
39	Lifestyle-related risk factors for Parkinson's disease: a population-based study.	Baldereschi, M Di Carlo, A Vanni, P Ghetti, A Carbonin, P Amaducci, L Inzitari, D	2003		Europe	No	No	NA	NA	Noncases: 51.3%M (n=2247), 48.7% F (total=4383) Cases: 51.3%M (n= 58), 48.7%F. (total=113)	No	NA	No		refer to regions ( municipalities) not ethnic groups
40	Caffeine, postmenopausal estrogen, and risk of Parkinson's disease.	Ascherio, A Chen, H Schwarzschild, M A Zhang, S M Colditz, G A Speizer, F E	2003		North America	No	No	NA	NA	All women ( cases: 154)	No	NA	No
41	Environmental, life-style, and physical precursors of clinical Parkinson's disease: recent findings from the Honolulu-Asia Aging Study.	Abbott, Robert D Ross, G Webster White, Lon R Sanderson, Wayne T Burchfiel, Cecil M Kashon, Michael Sharp, Dan S Masaki, Kamal H Curb, J David Petrovitch, Helen	2003		North America	Yes (as target group of study is a racial/ethnic group	Yes (as target group of study is a racial/ethnic group)	Target group of study is a racial/ethnic group	Japanese-Americans	100% M (8006), 137 PD cases	Yes (as target group of study is a racial/ethnic group	Yes and target group of study is a racial/ethnic group	NA		"migration from Asia and western Africa to the U. S. has resulted in an increase in the incidence of PD within these ethnic communities as compared to reported rates from countries of origin" PD incidence higher in this pop than in Japan, Europe or US
42	Risk of Parkinson disease in women: effect of reproductive characteristics.	Ragonese, P D'Amelio, M Salemi, G Aridon, P Gammino, M Epifanio, A Morgante, L Savettieri, G	2004		Europe	No	No	NA	NA	all female (131 cases and 131 controls)	No	NA	No
43	Environmental factors and Parkinson's disease: a case-control study in the Tuscany region of Italy.	Nuti, A Ceravolo, R Dell'Agnello, G Gambaccini, G Bellini, G Kiferle, L Rossi, C Logi, C Bonuccelli, U	2004		Europe	No	No	NA	NA	Cases: 106(M) and 84(F). Controls: 106(M) 84(F)	No	NA	No
44	Parkinson's disease among Inuit in Greenland: organochlorines as risk factors.	Koldkjaer, O G Wermuth, L Bjerregaard, P	2004	Parkinson’s disease, Inuit, organochlorines, case-control study	North America	Yes (as target group of study is a racial/ethnic group	Yes (as target group of study is a racial/ethnic group)	Target group of study is a racial/ethnic group	Inuit population	Control: 57 male, 65 F. Cases: 20 M, 11 F	Yes (as target group of study is a racial/ethnic group	Yes and target group of study is a racial/ethnic group	NA		Justified why looking at Inuit population was important. High prevalence of PD in this population comapred to european pop ( perhaps due to environemtnal factors)
45	Multiple risk factors for Parkinson's disease.	Gorell, Jay M Peterson, Edward L Rybicki, Benjamin A Johnson, Christine Cole	2004	Parkinson’s disease; Risk factors; Family history; Smoking; Pesticides; Metal	North America	Yes (as factor)	Yes (as a control variable/covariate the data analyses)	Each ethnoracial group was analysed distinctly	144 cases: White( 118, 81.9%), Black (22, 15.3%), other (4, 2.1%) 464 controls: White(395, 85.1%), Black(58, 12.5%), other(11, 2.4%)	Cases: 90, 62.5%(M) and 54, 37.5%(W) Controls: 293, 63.1%(M) and 171, 36.9% (W)	Yes (as factor)	No	NA		Description of dataset from other article (Look to comment)- same authors
46	Tumor diagnosis preceding Parkinson's disease: a case-control study.	D'Amelio, Marco Ragonese, Paolo Morgante, Letterio Epifanio, Antonio Callari, Graziella Salemi, Giuseppe Savettieri, Giovanni	2004	Parkinson’s disease; tumors; epidemiology;case– control	Europe	No	No	NA	NA	Control: 95 M, 127 F, Cases: 95M, 127 F	No	NA	No		Didn’t metion they aimed to specifically study participants Iin Italy? So it it target?recruited from 2 regions in Italy ( Palermo and Messina)
47	Postmenopausal estrogen use affects risk for Parkinson disease.	Currie, Lillian J Harrison, Madaline B Trugman, Joel M Bennett, James P Wooten, G Frederick	2004		North America	No	No	NA	NA	All women (68 cases and 72 controls after exclusion)	No	NA	No
48	Folate intake and risk of Parkinson's disease.	Chen, Honglei Zhang, Shumin M Schwarzschild, Michael A Hernán, Miguel A Logroscino, Giancarlo Willett, Walter C Ascherio, Alberto	2004	cohort studies; diet; folic acid; homocysteine; Parkinson disease	North America	No	No	NA	NA	cases: 248 M, 167 F ( total 47341 M, 88716 F)	No	NA	No
49	Risk and protective factors for Parkinson's disease: a study in Swedish twins.	Wirdefeldt, Karin Gatz, Margaret Pawitan, Yudi Pedersen, Nancy L	2005		Europe	No	No	NA	NA	PD cases: 230 M and 246 F, Controls: 1145 M and 1225 F	No	NA	No		Study in swedish poulation
50	Visual hallucinations in the diagnosis of idiopathic Parkinson's disease: a retrospective autopsy study.	Williams, David R Lees, Andrew J	2005		Europe	No	No	NA	NA	cases: 449 M, 295 F	No	NA	No
51	The G2019S LRRK2 mutation is uncommon in an Asian cohort of Parkinson's disease patients.	Tan, E K Shen, H Tan, L C S Farrer, M Yew, K Chua, E Jamora, R D Puvan, K Puong, K Y Zhao, Y Pavanni, R Wong, M C Yih, Yuen Skipper, L Liu, Jian-Jun	2005		Asia	Yes (as target group of study is a racial/ethnic group	Yes (as target group of study is a racial/ethnic group)	Target group of study is a racial/ethnic group	cases: 84.4% ethnic Chinese (n=570), 7.6% Malays (n=51), 5.9% Indians (n=40), 2.1% mixed ethnicity (n=14)	Not specified	Yes (as target group of study is a racial/ethnic group	Yes and target group of study is a racial/ethnic group	NA		no info at all on sex breakdown
52	Comprehensive evaluation of common genetic variation within LRRK2 reveals evidence for association with sporadic Parkinson's disease.	Skipper, Lisa Li, Yi Bonnard, Carine Pavanni, Ratnagopal Yih, Yuen Chua, Eva Sung, Wing-Kin Tan, Louis Wong, Meng-Cheong Tan, Eng-King Liu, Jianjun	2005		Asia	Yes (as target group of study is a racial/ethnic group	Yes (as target group of study is a racial/ethnic group)	Target group of study is a racial/ethnic group	All chinese ethnic group	PD cases: 466 total ( 56% M, 44% F) and 466 ethnicity and sex matched controls	Yes (as target group of study is a racial/ethnic group	Yes and target group of study is a racial/ethnic group	NA		Included all chinese to eliminate confounding
53	Family-based case-control study of cigarette smoking and Parkinson disease.	Scott, W K Zhang, F Stajich, J M Scott, B L Stacy, M A Vance, J M	2005		North America	No	Yes (as descriptives of the sample)	Described and combined with the total sample	all white	Cases: 49M and 31F	No	NA	Yes		Not enough non-white
54	Effect of reproductive factors and postmenopausal hormone use on the risk of Parkinson disease.	Popat, R A Van Den Eeden, S K Tanner, C M McGuire, V Bernstein, A L Bloch, D A Leimpeter, A Nelson, L M	2005		North America	No	Yes (as descriptives of the sample)	Each ethnoracial group was analysed distinctly	non-Hispanic white (cases: 82.9%, n= 145 and controls: 82.4%, n=154), Hispanic white (cases: 6.9%, n=12 and controls: 5.4%, n=12)), other (cases: 10.2%, n=18 and controls: 12.2% and n=23)	All women ( cases: 178, controls: 189)	Yes (as factor)	No	NA
55	Association of N-acetyl transferase 2 gene polymorphism and slow acetylator phenotype with young onset and late onset Parkinson's disease among Indians.	Chaudhary, Shashi Behari, Madhuri Dihana, Maninder Swaminath, Pazhayannur V Govindappa, Shyla T Jayaram, Sachi Singh, Sumit Muthane, Uday B Juyal, Ramesh C B K, Thelma	2005		Asia	Yes (as target group of study is a racial/ethnic group	Yes (as target group of study is a racial/ethnic group)	Target group of study is a racial/ethnic group	Indian popuation	cases: 69F and 198M. Controls: 83F and 241M	Yes (as target group of study is a racial/ethnic group	Yes and target group of study is a racial/ethnic group	NA
56	Dietary fatty acids and the risk of Parkinson disease: the Rotterdam study.	de Lau, L M L Bornebroek, M Witteman, J C M Hofman, A Koudstaal, P J Breteler, M M B	2005		Europe	No	No	NA	NA	Population: 3,122(59%)F	No	NA	No
57	Education and occupations preceding Parkinson disease: a population-based case-control study.	Frigerio, R Elbaz, A Sanft, K R Peterson, B J Bower, J H Ahlskog, J E Grossardt, B R de Andrade, M Maraganore, D M Rocca, W A	2005		North America	No	No	NA	NA	cases: 104M and 63F controls: 104M and 63F	No	NA	No
58	Consumption of milk and calcium in midlife and the future risk of Parkinson disease.	Park, M Ross, G W Petrovitch, H White, L R Masaki, K H Nelson, J S Tanner, C M Curb, J D Blanchette, P L Abbott, R D	2005		North America	No	Yes (as descriptives of the sample)	Described and combined with the total sample	all Japanese ancestry	7,504 men, 128 PD cases	No	NA	No
59	Occupation and parkinsonism in three movement disorders clinics.	Goldman, S M Tanner, C M Olanow, C W Watts, R L Field, R D Langston, J W	2005		North America	No	Yes (as descriptives of the sample)	Each ethnoracial group was analysed distinctly	White (nonhispanic): 87.7% White hispanic: 3.2%, Black: 1.7% Asian/Pacific Islander: 6.3%	total: 2072, 66.8%(M) and 33.2% (W)	Yes (as factor)	Yes	NA
60	Cigarette smoking and Parkinson's disease: a case-control study in a population characterized by a high prevalence of pesticide exposure.	Galanaud, Jean-Philippe Elbaz, Alexis Clavel, Jacqueline Vidal, Jean-Sébastien Corrèze, Jean-René Alpérovitch, Annick Tzourio, Christophe	2005	Parkinson’s disease; smoking; case– control; epidemiology	Europe	No	No	NA	NA	Controls (N=676): 377M (56%), 302F Cases (N=247): 138M (56%), 109F	No	NA	No
61	The dardarin G 2019 S mutation is a common cause of Parkinson's disease but not other neurodegenerative diseases.	Hernandez, Dena Paisan Ruiz, Coro Crawley, Anthony Malkani, Roneil Werner, John Gwinn-Hardy, Katrina Dickson, Dennis Wavrant Devrieze, Fabienne Hardy, John Singleton, Andrew	2005		Unknown	Yes (as target group of study is a racial/ethnic group	Yes (as target group of study is a racial/ethnic group)	Target group of study is a racial/ethnic group	All Caucasian,	Cases: 5 M and 4F	Yes (as target group of study is a racial/ethnic group	Yes and target group of study is a racial/ethnic group	NA	Of european origin ( northern euro, eastern euro, south american)	Specfic mutation very common in populations of euro origin
62	Common variants of LRRK2 are not associated with sporadic Parkinson's disease.	Biskup, Saskia Mueller, Jakob C Sharma, Manu Lichtner, Peter Zimprich, Alexander Berg, Daniela Wüllner, Ullrich Illig, Thomas Meitinger, Thomas Gasser, Thomas	2005		Europe	No	No	NA	NA	Cases: ratio of 1.38 male:female	No	NA	No
63	GSK3B polymorphisms alter transcription and splicing in Parkinson's disease.	Kwok, John B J Hallupp, Marianne Loy, Clement T Chan, Daniel K Y Woo, Jean Mellick, George D Buchanan, Daniel D Silburn, Peter A Halliday, Glenda M Schofield, Peter R	2005		Other	No	Yes (as an integral part of the data analyses)	Each ethnoracial group was analysed distinctly	2 cohort: White controls: 302 Cases: 302 from australia. Chinese control: 184 control and 184 cases Hong Kong Chinese	White: 128 M, 174 F (in each case and control) Chinese: 96 M and 88 F (in each case and control)	Yes (as factor)	Yes	NA		Looked at genotyping differences an dismilarities in the two ethnic groups. Mentioned looking at ethncities is important fro understandig mechanisms mentioned that thnic groups underrepresented in dieases resaerch
64	Occupations and Parkinson's disease: a multi-center case-control study in South Korea.	Park, Jungsun Yoo, Cheol-In Sim, Chang Sun Kim, Hyo Kyung Kim, Jae Woo Jeon, Beom S Kim, Ki-Rak Bang, Oh-Young Lee, Won-Yong Yi, Yunjeong Jung, Kap-Yeol Chung, Soo-Eun Kim, Yangho	2005		Asia	No	No	NA	NA	Control: 198 M, 111F. Cases:177M, 190 F	No	NA	No
65	Analysis of LRRK 2 G 2019 S and I 2020 T mutations in Parkinson's disease.	Bialecka, Monika Hui, Shen Klodowska-Duda, Gabriela Opala, Grzegroz Tan, Eng-King Drozdzik, Marek	2005	LRRK2 gene; Parkinson disease	Europe	Yes (as target group of study is a racial/ethnic group	Yes (as target group of study is a racial/ethnic group)	Target group of study is a racial/ethnic group	All caucasian from Silesian region of Poland	Control: 92 M, 98 F. Cases: 98 M, 76 F	Yes (as target group of study is a racial/ethnic group	Yes and target group of study is a racial/ethnic group	NA		Population is Polish, mentioned race is important and could be speciifc to mutations
66	Dietary factors and smoking as risk factors for PD in a rural population in China: a nested case-control study.	Ma, L Zhang, L Gao, X H Chen, W Wu, Y P Wang, Y Li, X F Como, P Kieburtz, K Qiao, Y L	2006		Asia	No	No	NA	NA	Cases: n=85: n=40 /47.1% M and n=45 /52.9% F Cases: n=340: 47.1% M 52.9% F	No	NA	No		Mentioned that nutrition is poor in the linixian group
67	Blood donations, iron stores, and risk of Parkinson's disease.	Logroscino, Giancarlo Chen, Honglei Wing, Al Ascherio, Alberto	2006	iron; blood donation; Parkinson’s disease; risk cohort studies	North America	No	No	NA	NA	all male ( n= 38, 411)	No	NA	No
68	Chemical exposures and Parkinson's disease: a population-based case-control study.	Frigerio, Roberta Sanft, Kevin R Grossardt, Brandon R Peterson, Brett J Elbaz, Alexis Bower, James H Ahlskog, J Eric de Andrade, Mariza Maraganore, Demetrius M Rocca, Walter A	2006		North America	No	No	NA	NA	60% male cases (n=90) and 40% female, and then 129 sex matched for controls ( total cases: 149)	No	NA	No
69	Dietary folate, vitamin B12, and vitamin B6 and the risk of Parkinson disease.	de Lau, L M L Koudstaal, P J Witteman, J C M Hofman, A Breteler, M M B	2006	Diet: Folate: Vitamin B6: Vitamin B12: Parkinson’s disease	Europe	No	No	NA	NA	total(n=5,289): 3122(59%)W	No	NA	No
70	Relationship between impulsive sensation seeking traits, smoking, alcohol and caffeine intake, and Parkinson's disease.	Evans, A H Lawrence, A D Potts, J MacGregor, L Katzenschlager, R Shaw, K Zijlmans, J Lees, A J	2006		Europe	No	Yes (as descriptives of the sample)	Described and combined with the total sample	Caucasian	Control: 65 M, 41 F, Cases:65 M, 41 F	No	NA	No
71	A common genetic factor for Parkinson disease in ethnic Chinese population in Taiwan.	Fung, Hon-Chung Chen, Chiung-Mei Hardy, John Singleton, Andrew B Wu, Yih-Ru	2006		Asia	Yes (as target group of study is a racial/ethnic group	Yes (as target group of study is a racial/ethnic group)	Target group of study is a racial/ethnic group	Han Chinese from Taiwan	Cases: 54% M, 46% F (total: 305), same for Control (total = 176)	Yes (as target group of study is a racial/ethnic group	Yes and target group of study is a racial/ethnic group	NA
72	Revealing the role of glutathione S-transferase omega in age-at-onset of Alzheimer and Parkinson diseases	Li, Yi-Ju Scott, William K Zhang, Ling Lin, Ping-I Oliveira, Sofia A Skelly, Tara Doraiswamy, Maurali P Welsh-Bohmer, Kathleen A Martin, Eden R Haines, Jonathan L Pericak-Vance, Margaret A Vance, Jeffery M	2006	Alzheimer disease; GSTO1; Age at onset; Association; Linkage	North America	No	No	NA	NA	Not specfied ( family data)	No	NA	No
73	Identification and haplotype analysis of LRRK2 G2019S in Japanese patients with Parkinson disease.	Zabetian, C P Morino, H Ujike, H Yamamoto, M Oda, M Maruyama, H Izumi, Y Kaji, R Griffith, A Leis, B C Roberts, J W Yearout, D Samii, A Kawakami, H	2006		Asia	Yes (as target group of study is a racial/ethnic group	Yes (as target group of study is a racial/ethnic group)	Target group of study is a racial/ethnic group	Cases: 586 of Japanese ancestory and 4 european and ashkenazi jewish ancestry Controls: 317 of Japanese ancestry and 453 european-american	cases (n=586): 42.6% M. controls( n=317): 36%M	Yes (as target group of study is a racial/ethnic group	Yes and target group of study is a racial/ethnic group	NA
74	Prospective prevalence of pathologic gambling and medication association in Parkinson disease.	Voon, V Hassan, K Zurowski, M Duff-Canning, S de Souza, M Fox, S Lang, A E Miyasaki, J	2006		North America	No	No	NA	NA	cases(n=10): 60%M and controls(n=286): 60%M	No	NA	No
75	Head injury and Parkinson's disease risk in twins.	Goldman, Samuel M Tanner, Caroline M Oakes, David Bhudhikanok, Grace S Gupta, Anjali Langston, J William	2006		North America	No	Yes (as descriptives of the sample)	Described and combined with the total sample	All white	all male ( total = approx. 16 000)	No	NA	No
76	Serum cholesterol levels and the risk of Parkinson's disease.	de Lau, Lonneke M L Koudstaal, Peter J Hofman, Albert Breteler, Monique M B	2006	cholesterol; cohort studies; lipid metabolism; neurodegenerative diseases; Parkinson disease; prospective studies; risk factors; serum	Europe	No	No	NA		total = 6,465: 41.1% M ( 2654), 58.9% F (3811) cases: 46(M) and 41(F)	No	NA	No
77	A prospective study of night shift work, sleep duration, and risk of Parkinson's disease.	Chen, Honglei Schernhammer, Eva Schwarzschild, Michael A Ascherio, Alberto	2006		North America	No	No	NA		All female (84,794)	No	NA	No
78	Physical activity and risk of Parkinson's disease: a prospective cohort study.	Logroscino, G Sesso, H D Paffenbarger, R S Jr Lee, I-M	2006		North America	No	Yes (as descriptives of the sample)	Described and combined with the total sample	primarily white	all men (10714)	No	NA	No
79	Diabetes, smoking, and other medical conditions in relation to Parkinson's disease risk.	Powers, Karen M Smith-Weller, Terri Franklin, Gary M Longstreth, W T Jr Swanson, Phillip D Checkoway, Harvey	2006		North America	No	Yes (as a control variable/covariate the data analyses)	All ethnoracial groups other than White were considered together	Control: 92% non-hispanic caucasian and 8% other. Cases: 94% nonhispanic caucasian and 6% other	total: 515 M, 321 F (61.6 %M of cases and then age matched controls). Cases: 217M and 135 F. Controls: 298M and 186 F	Yes (as factor)	No	NA		included to control for it
80	Association study of sporadic Parkinson's disease genetic risk factors in patients from Russia by APEX technology.	Shadrina, Maria Nikopensius, Tiit Slominsky, Petr Illarioshkin, Sergei Bagyeva, Gulbahar Markova, Elene Ivanova-Smolenskaia, Irina Kurg, Ants Limborska, Svetlana Metspalu, Andres	2006		Europe	No	Yes (as a control variable/covariate the data analyses)	NA	Controls matched for ethincity.	Cases: 36 M, 61 F, controls matched	No	NA	No
81	Body mass index and the risk of Parkinson disease.	Hu, G Jousilahti, P Nissinen, A Antikainen, R Kivipelto, M Tuomilehto, J	2006		North America	No	No	NA	NA	Population: 22,367F and 23, 439M	No	NA	No
82	Complement C3c and related protein biomarkers in amyotrophic lateral sclerosis and Parkinson's disease.	Goldknopf, Ira L Sheta, Essam A Bryson, Jennifer Folsom, Brian Wilson, Chris Duty, Jeff Yen, Albert A Appel, Stanley H	2006	Amytrophic lateral sclerosis; Parkinson’s; Neurodegenerative; Proteomic; LC–MS/MS; Two-dimensional electrophoresis; Immune;Inflammation; Complement; Phosphorylation	North America	No	No	NA	NA	Not specfied ( obtained patient serum samples - no pateint demographic information provided)	No	NA	No
83	Glucocerebrosidase gene mutation is a risk factor for early onset of Parkinson disease among Taiwanese.	Wu, Yih-Ru Chen, Chiung-Mei Chao, Chih-Ying Ro, Long-Sun Lyu, Rong-Kuo Chang, Kuo-Hsuan Lee-Chen, Guey-Jen	2007		Asia	Yes (as target group of study is a racial/ethnic group	Yes (as target group of study is a racial/ethnic group)	Target group of study is a racial/ethnic group	Ethnically homogeneous Taiwanese population	total cases: 518 ( 45.2% female), total controls: 339 (47.5 %female)	Yes (as target group of study is a racial/ethnic group	Yes and target group of study is a racial/ethnic group	NA		compared to Ashkenazi Jewish population
84	Association of Parkinson's disease with symptoms of attention deficit hyperactivity disorder in childhood.	Walitza, S Melfsen, S Herhaus, G Scheuerpflug, P Warnke, A Müller, T Lange, K W Gerlach, M	2007		Europe	No	No	NA	NA	Cases: 106(M) and 84(F). Controls: 106(M) 84(F)	No	NA	No
85	Occupational titles as risk factors for Parkinson's disease.	Dick, Smita Semple, Sean Dick, Finlay Seaton, Anthony	2007	Job coding; occupational titles; Parkinson’s disease.	Europe	No	No	NA	NA	781 cases and 1587 age and gender balanced controls ( further sex brealdown not repported)	No	NA	No
86	Gout and risk of Parkinson disease: a prospective study.	Alonso, Alvaro Rodríguez, Luis A García Logroscino, Giancarlo Hernán, Miguel A	2007		Europe	No	No	NA	NA	PD cases(n=1052):39.9%F and Controls(n=6634):40.9%F	No	NA	No
87	Nonsteroidal anti-inflammatory drugs and the risk of Parkinson disease.	Bornebroek, Marjolijn de Lau, Lonneke M L Haag, Mendel D M Koudstaal, Peter J Hofman, Albert Stricker, Bruno H C Breteler, Monique M B	2007		Europe	No	No	NA	NA	total=6,512. 3,845(59%) W	No	NA	No
88	Mitochondrial DNA polymorphisms and the risk of Parkinson's disease in Taiwan.	Chen, C M Kuan, C C Lee-Chen, G-J Wu, Y R	2007	Parkinson’s disease, mitochondrial DNA polymorphisms, haplotype and disease association	Asia	Yes (as target group of study is a racial/ethnic group	Yes (as target group of study is a racial/ethnic group)	Target group of study is a racial/ethnic group	All Taiwanese (ethnically matched)	Control (n=372): 46.5% F, 53.5% M. Cases (n=416): 55.3% M, 44.7% F	Yes (as target group of study is a racial/ethnic group	Yes and target group of study is a racial/ethnic group	NA		Disscussed the importance of looking at genetics in different ethnic populations
89	Consumption of dairy products and risk of Parkinson's disease.	Chen, Honglei O'Reilly, Eilis McCullough, Marjorie L Rodriguez, Carmen Schwarzschild, Michael A Calle, Eugenia E Thun, Michael J Ascherio, Alberto	2007	dairy products; diet; milk; Parkinson disease	North America	No	No	NA	NA	57689 M, 731275 F (cases: 250 M, 138 F)	No	NA	No
90	Gene-environment interactions in parkinsonism and Parkinson's disease: the Geoparkinson study.	Dick, F D De Palma, G Ahmadi, A Osborne, A Scott, N W Prescott, G J Bennett, J Semple, S Dick, S Mozzoni, P Haites, N Wettinger, S Bezzina Mutti, A Otelea, M Seaton, A Soderkvist, P Felice, A	2007		Europe	No	No	NA	NA	959 cases ( 537 M, 422 F) and 1989 age and sex matched controls ( 1057M, 932 F)	No	NA	Yes		No info on race/ethnicity collected
91	Environmental risk factors for Parkinson's disease and parkinsonism: the Geoparkinson study.	Dick, F D De Palma, G Ahmadi, A Scott, N W Prescott, G J Bennett, J Semple, S Dick, S Counsell, C Mozzoni, P Haites, N Wettinger, S Bezzina Mutti, A Otelea, M Seaton, A Söderkvist, P Felice, A	2007		Europe	No	No	NA	NA	959 cases ( 537 M, 422 F) and 1989 age and sex matched controls ( 1057M, 932 F)	No	NA	No
92	Prospective case-control study of nonfatal cancer preceding the diagnosis of Parkinson's disease.	Driver, Jane A Kurth, Tobias Buring, Julie E Gaziano, J Michael Logroscino, Giancarlo	2007	Cancer _x0001_ Parkinson’s disease _x0001_ Etiology _x0001_ Risk _x0001_ Case–control studies	North America	No	Yes (as descriptives of the sample)	Described and combined with the total sample	92.2% self-identified as white	All male (22,071)	No	NA	No	Self-identified as white
93	Lrrk2 G2385R is an ancestral risk factor for Parkinson's disease in Asia.	Farrer, Matthew J Stone, Jeremy T Lin, Chin-Hsien Dächsel, Justus C Hulihan, Mary M Haugarvoll, Kristoffer Ross, Owen A Wu, Ruey-Meei	2007		Asia	Yes (as target group of study is a racial/ethnic group	Yes (as target group of study is a racial/ethnic group)	Target group of study is a racial/ethnic group	ethnic Chinese taiwanese	Cases: 18 (53%) Male ( total cases = 34) Controls 214(57%) Male ( total controls=376)	Yes (as target group of study is a racial/ethnic group	Yes and target group of study is a racial/ethnic group	NA		Described LRRK G2019S as common in Caucasian and G2385R common in Asians
94	Number of children and risk of Parkinson's disease.	Frigerio, Roberta Breteler, Monique M B de Lau, Lonneke M L Sanft, Kevin R Bower, James H Ahlskog, J Eric Grossardt, Brandon R Maraganore, Demetrius M Rocca, Walter A	2007		Other	No	Yes (as descriptives of the sample)	Each ethnoracial group was analysed distinctly	Primarily white and of european descent. In Omsted study: All cases and controls were white of European ancestry, except for one Native American. In the Rotterdam study: 98% white and 2% Surinam or Indonesian	Olmsted: 193 cases, 120 M ( 62%). 193 controls, 120 M Rotterdam: 2610 M and 3731W	Yes (as factor)	Yes	NA		Mentioned that results could not be applied to other ethnic group as done in a white population
95	Erectile function and risk of Parkinson's disease.	Gao, Xiang Chen, Honglei Schwarzschild, Michael A Glasser, Dale B Logroscino, Giancarlo Rimm, Eric B Ascherio, Alberto	2007	impotence; Parkinson disease	North America	No	No	NA	NA	all men (32616)	No	NA	No
96	Type 2 diabetes and the risk of Parkinson's disease.	Hu, Gang Jousilahti, Pekka Bidel, Siamak Antikainen, Riitta Tuomilehto, Jaakko	2007		Europe	No	No	NA	NA	M: 25168 F: 26384 Cases: 324 M 309 W ( devoped PD)	No	NA	No
97	Population prevalence and incidence of Parkinson's disease in an Australian community.	Mehta, P Kifley, A Wang, J J Rochtchina, E Mitchell, P Sue, C M	2007		Oceania/Australasia	No	Yes (as descriptives of the sample)	Described and combined with the total sample	Predominantly caucasian	19 cases ( 12 M and 7 F) - longitundinal 16 cases (10 M and 6F) - crossectional	No	NA	No
98	The LRRK2 G2019S mutation in Ashkenazi Jews with Parkinson disease: is there a gender effect?	Orr-Urtreger, A Shifrin, C Rozovski, U Rosner, S Bercovich, D Gurevich, T Yagev-More, H Bar-Shira, A Giladi, N	2007		Asia	Yes (as factor)	Yes (as an integral part of the data analyses)	Each ethnoracial group was analysed distinctly	total PD cases (n=472): 72.9% (n=344) Ashkenazi ancestry 23.7%: non-Ashkenazi (n =112) 3.0%: mixed (half Ashkenazi) origin (n=14) and n=12: unknown origin. Controls (n=1,802): Ashkenazi ancestry= 841, non-Ashkenazi= 957, mixed=4	Cases (n=472): 35.8% women (n=169) and 64.2% M (n=303) total controls (n=1,802) mostly women ashkenazi controls age and sex matched: (n=252): 56.3%M and 43.7%W	Yes (as factor)	Yes	NA
99	Is there seasonal variation in risk of Parkinson's disease?	Postuma, Ronald B Wolfson, Christina Rajput, Ali Stoessl, A Jon Martin, W R Wayne Suchowersky, Oksana Chouinard, Sylvain Panisset, Michel Jog, Mandar S Grimes, David A Marras, Connie Lang, Anthony E	2007	Parkinson’s disease; epidemiology; seasonal variation	North America	No	No	NA	NA	gender information not required for inclusion criteria ( only provided for half of sample)	No	NA	No		population demographics in supplemntal but unable to open
100	Height as a potential indicator of early life events predicting Parkinson's disease: a case-control study.	Ragonese, Paolo D'Amelio, Marco Callari, Graziella Aiello, Fabio Morgante, Letterio Savettieri, Giovanni	2007	Parkinson’s disease; epidemiology; risk factors; height; anthropometric measures.	Europe	No	No	NA	NA	cases: 266( 123M and 143W) and controls: 266 (122M and 144W)	No	NA	No		Mentioned participants from Italy but didn’t describe them as Italian
101	Pooled analysis of tobacco use and risk of Parkinson disease.	Ritz, Beate Ascherio, Alberto Checkoway, Harvey Marder, Karen S Nelson, Lorene M Rocca, Walter A Ross, G Webster Strickland, Daniel Van Den Eeden, Stephen K Gorell, Jay	2007		North America	Yes (as factor)	Yes (as an integral part of the data analyses)	Each ethnoracial group was analysed distinctly	Case- control: washington( white: 93%, african american: 2%, Asian: 2%, Hispanic: 1%), Detroit(white: 84%, african american: 13%, Asian: 1%, Hispanic: 1%), NYC( white: 48%, african american: 14%, Asian: 0%, Hispanic: 36%), N.Cali(1)(white: 83%, african american: 5%, Asian: 4%, Hispanic: 7%), C.Cali( white: 100%, african american: 0%, Asian: 0%, Hispanic: 0%), Nebraska (white: 97%, african america…	Case-control ( washington: 61%M, detroit: 63%M, NYC:43%M, N.Cali(2): 61%M, C.Cali: 54%M, Olmsted: 60%M, Nebraska: 53%M, N.Cali(1): 57%M) and Cohort (Honolulu:100%M, Health Porfessionals: 100%M, Nurses Health: 100%F)	Yes (as factor)	Yes	NA		Attributed potential effects to geentic diversity of gene-environment interactions "Differences observed by race and age at diagnosis warrant further study"
102	Molecular markers of early Parkinson's disease based on gene expression in blood.	Scherzer, Clemens R Eklund, Aron C Morse, Lee J Liao, Zhixiang Locascio, Joseph J Fefer, Daniel Schwarzschild, Michael A Schlossmacher, Michael G Hauser, Michael A Vance, Jeffery M Sudarsky, Lewis R Standaert, David G Growdon, John H Jensen, Roderick V Gullans, Steven R	2007		North America	No	No	NA	NA	50 PD cases(n= 39/ 78% M) and 55 controls: healthy controls: n=22 (11/50% M), AD: n=23 (8/35% M), PSP: n=6 (4/67% M), other diseases: n=4 (3/75% M)	No	NA	No
103	Prevalence of Parkinson's disease in Korea.	Seo, Woo-Keun Koh, Seong-Beom Kim, Byung-Jo Yu, Sung-Wook Park, Mun-Ho Park, Kun-Woo Lee, Dae-Hie	2007	Parkinson’s disease; Prevalence; Korea	Asia	Yes (as target group of study is a racial/ethnic group	Yes (as target group of study is a racial/ethnic group)	Target group of study is a racial/ethnic group	Korean/Asian	M:2007, F:2211, case prevalence: 498/100 000M and 271/1000 000F	Yes (as target group of study is a racial/ethnic group	Yes and target group of study is a racial/ethnic group	NA		Mentioned prevalence is similar to Western European or American Caucasian
104	Risk factors for Parkinson's disease and impaired olfaction in relatives of patients with Parkinson's disease.	Siderowf, Andrew Jennings, Danna Connolly, James Doty, Richard L Marek, Kenneth Stern, Matthew B	2007	olfaction; Parkinson’s disease; caffeine; risk factors; family history	North America	No	No	NA	NA	total: n=173, 31% M, 69% F	No	NA	No
105	Hypertension, hypercholesterolemia, diabetes, and risk of Parkinson disease.	Simon, Kelly Claire Chen, Honglei Schwarzschild, Michael Ascherio, Alberto	2007		North America	No	No	NA	NA	Population: M:50833 and F:121046, cases: 173M and 141W	No	NA	No
106	Temporal relationship between cigarette smoking and risk of Parkinson disease.	Thacker, E L O'Reilly, E J Weisskopf, M G Chen, H Schwarzschild, M A McCullough, M L Calle, E E Thun, M J Ascherio, A	2007		North America	No	Yes (as a control variable/covariate the data analyses)	Described and combined with the total sample	population: Mostly white (97%) and cases: 99% white	population: M:63,348, F:79,977 and cases: 142F and 263M	Yes (as factor)	No	NA
107	Plasma urate and risk of Parkinson's disease.	Weisskopf, M G O'Reilly, E Chen, H Schwarzschild, M A Ascherio, A	2007		Europe	No	Yes (as a control variable/covariate the data analyses)	All ethnoracial groups other than White were considered together	Mostly white and european ancestry	18,018 males (84 cases and 165 controls)	No	NA	No		controls matched on race ( white/ other)
108	Identifying incident cases of parkinsonism among veterans using a tertiary medical center.	White, Donna Moore, Suzanne Waring, Stephen Cook, Karon Lai, Eugene	2007	Parkinson’s disease; secondary; veterans; inci-dence; vital status; ICD-9 CM	North America	Yes (as factor)	Yes (as an integral part of the data analyses)	All ethnoracial groups other than White were considered together	PD: White 81%, African-American 15%, Hispanic 4%, other: 0%. SP: white 68%, African-American 24%, Hispanic 5.3%, other 1.3%. PD+: white 81.3% African-American 12.5%, Hispanic 6.3%, other: 0%	total cases: N=191: PD cases: M:96%, F:4% (N=100), SP(2nd Parkinsonism): 98.7%M and 1.3%F (N=75), PD+( parkinson's plus syndromes): 100%M (N=16)	Yes (as factor)	No	NA		Grouped the races as white or non-white in analysis
109	Coffee and tea consumption and the risk of Parkinson's disease.	Hu, Gang Bidel, Siamak Jousilahti, Pekka Antikainen, Riitta Tuomilehto, Jaakko	2007	coffee; Parkinson’s disease; tea	Europe	No	No	NA	NA	Population: M: 14293, F:15042, cases: 102M and 98F	No	NA	No
110	Gout and the risk of Parkinson's disease: a cohort study.	De Vera, Mary Rahman, M Mushfiqur Rankin, James Kopec, Jacek Gao, Xiang Choi, Hyon	2008		North America	No	No	NA	NA	Poplation: gout: 37,330(66.4%)M) and no gout: 7,482(66.5%)M. PD Cases: 310F and 872M	No	NA	No
111	Pathogenicity of LRRK2 P755L variant in Parkinson's disease.	Tan, Eng-King Lim, Hui-Qin Yuen, Yih Zhao, Yi	2008	Parkinson’s disease; LRRK2; variant.	Asia	Yes (as target group of study is a racial/ethnic group	Yes (as target group of study is a racial/ethnic group)	Target group of study is a racial/ethnic group	Chinease population	204 cases and 235 controls ( equal proportion of M and F)	Yes (as target group of study is a racial/ethnic group	Yes and target group of study is a racial/ethnic group	NA
112	Association study of semaphorin 5A with risk of Parkinson's disease in a Chinese Han population.	Ding, Haixia Wang, Feng Ding, Xinsheng Song, Xinjian Lu, Xiaowei Zhang, Kezhong Xiao, Hang Ye, Min Chen, Jiechun Zhang, Qingshan	2008	Parkinson's diseaseSemaphorin 5ASingle nucleotide polymorphism, Case control study	Asia	Yes (as target group of study is a racial/ethnic group	Yes (as target group of study is a racial/ethnic group)	Target group of study is a racial/ethnic group	all subjects were of Chinese Han ancestry	PD cases: 199M/141F and Controls: 145M/77F	Yes (as target group of study is a racial/ethnic group	Yes and target group of study is a racial/ethnic group	NA
113	Total cholesterol and the risk of Parkinson disease.	Hu, G Antikainen, R Jousilahti, P Kivipelto, M Tuomilehto, J	2008		Europe	No	No	NA	NA	Partcipants: 24,773M and 26,153F. Cases: 321M and 304F	No	NA	No
114	Perceived imbalance and risk of Parkinson's disease.	Gao, Xiang Chen, Honglei Schwarzschild, Michael A Logroscino, Giancarlo Ascherio, Alberto	2008	Perceived imbalance; Parkinson’s disease; Prospective study	North America	No	No	NA	NA	Participants: M:39087, F: 82299 and Cases: 242M and 207F	No	NA	No
115	Prospective study of coffee consumption and risk of Parkinson's disease.	Sääksjärvi, K Knekt, P Rissanen, H Laaksonen, M A Reunanen, A Männistö, S	2008	coffee; cohort studies; Parkinson’s disease	Europe	No	No	NA	NA	PD cases (N=101): 45.2% M, Controls (N=6609): 47.6%M	No	NA	No
116	Coffee, caffeine-related genes, and Parkinson's disease: a case-control study.	Facheris, Maurizio F Schneider, Nicole K Lesnick, Timothy G de Andrade, Mariza Cunningham, Julie M Rocca, Walter A Maraganore, Demetrius M	2008	Parkinson's disease; coffee; genes	North America	No	Yes (as a control variable/covariate the data analyses)	Described and combined with the total sample	Controls were siblings matched for ethnicty. PD cases: both European(504/83.4%), N.Euro(186/36.95%), one parent euro (67/11.1%), one parent american(27/4.5%), both parents american(22/3.6%), Asian(2/0.3%), Mexican(1/0.2%), African(0%), unknown( 5/0.8%). All controls: both European(506/83.8%), one parent euro (57/9.4%), one parent american(23/3.8%), both parents american(23/3.8%), Asian(2/0.3%), M…	case-sibling pairs= PD cases: 273(61.2%)M and 173(38.8%)F, Sibling controls: 219(49.1%)M and 227(50.9%)F. Case-unrelated control pairs= Pd cases: 93(58.9%)M and 65(41.1%)F, unrelated controls: 93(58.9%)M and 65(41.1%)F. All case- control pairs= PD cases: 336(60.6%)M and 238(39.4%)F, All controls: 312(51.7%)M and 292(48.3%)F	Yes (as factor)	Yes	NA	Self-reported	Matched to avoid confounding
117	Prospective cohort study of type 2 diabetes and the risk of Parkinson's disease.	Driver, Jane A Smith, Ashley Buring, Julie E Gaziano, J Michael Kurth, Tobias Logroscino, Giancarlo	2008		North America	No	No	NA	NA	All men (21, 841) cases: 556,	No	NA	No
118	Peripheral inflammatory biomarkers and risk of Parkinson's disease.	Chen, Honglei O'Reilly, Eilis J Schwarzschild, Michael A Ascherio, Alberto	2008	biological markers; C-reactive protein; inflammation; interleukin-6; odds ratio; Parkinson disease; tumor necrosis factor-a	North America	No	Yes (as a control variable/covariate the data analyses)	All ethnoracial groups other than White were considered together	Controls were matched for race as White or Other	all men ( 18, 018 population and 84 cases and 165 controls)	No	NA	No
119	Dietary iron intake and risk of Parkinson's disease.	Logroscino, Giancarlo Gao, Xiang Chen, Honglei Wing, Al Ascherio, Alberto	2008	ascorbic acid; diet; heme; iron; Parkinson disease; prospective studies	North America	No	Yes (as descriptives of the sample)	Described and combined with the total sample	Mostly white	Population: M:47406, F:76947 and cases: 248M, 174F	No	NA	No		Findings limited because mostly white
120	Mitochondrial transcription factor A (TFAM) gene variation in Parkinson's disease.	Alvarez, Victoria Corao, Ana I Sánchez-Ferrero, Elena De Mena, Lorena Alonso-Montes, Cristina Huerta, Cecilia Blázquez, Marta Ribacoba, René Guisasola, Luis M Salvador, Carlos García-Castro, Mónica Coto, Eliecer	2008	Mitochondria; Parkinson’s disease; Mitochondria transcription factors; DNA-polymorphisms	Europe	No	Yes (as descriptives of the sample)	Described and combined with the total sample	All caucasians	Control: 43%M, 57%F (N=225), Cases:44%M, 56%F (N=250)	No	NA	No
121	Diet, urate, and Parkinson's disease risk in men.	Gao, Xiang Chen, Honglei Choi, Hyon K Curhan, Gary Schwarzschild, Michael A Ascherio, Alberto	2008	diet; men; Parkinson disease; uric acid	North America	No	No	NA	NA	All men = 47,406 (cases, n= 284)	No	NA	No
122	Pesticide exposure and risk of Parkinson's disease: a family-based case-control study.	Hancock, Dana B Martin, Eden R Mayhew, Gregory M Stajich, Jeffrey M Jewett, Rita Stacy, Mark A Scott, Burton L Vance, Jeffery M Scott, William K	2008		North America	No	Yes (as descriptives of the sample)	Described and combined with the total sample	Included only the white families to avoid confounds ( 308 families)	Cases: 67.7% M and Controls: 43.2%M	No	NA	Yes		stratified families by self-reported race/ethnicity to minimize bias due to across-family confounding by ethnicity
123	Prospective association between emotional health and clinical evidence of Parkinson's disease.	Ishihara-Paul, L Wainwright, N W J Khaw, K-T Luben, R N Welch, A A Day, N E Brayne, C Surtees, P G	2008	anxiety, depression, neuroticism, Parkinsons disease, prospective	Europe	No	No	NA	NA	Partcipants: M:9062, F:11793 and cases: 91M and 84F	No	NA	No
124	Progranulin variability has no major role in Parkinson disease genetic etiology.	Nuytemans, K Pals, P Sleegers, K Engelborghs, S Corsmit, E Peeters, K Pickut, B Mattheijssens, M Cras, P De Deyn, P P Theuns, J Van Broeckhoven, C	2008		Europe	No	No	NA	NA	PD cases(n=255): 43.1%F and Controls(n=459): 54.9%F	No	NA	No
125	Risk of Parkinson's disease after hospital contact for head injury: population based case-control study.	Rugbjerg, Kathrine Ritz, Beate Korbo, Lise Martinussen, Nick Olsen, Jørgen H	2008		Europe	No	No	NA	NA	Population: 37101 M, 31344F and Cases: M: 7423, F:6272	No	NA	No
126	Body mass index does not change before Parkinson's disease onset.	Ragonese, P D'Amelio, M Callari, G Di Benedetto, N Palmeri, B Mazzola, M A Terruso, V Salemi, G Savettieri, G Aridon, P	2008	anthropometrical measures, body mass index, case–control study, epidemiology, Parkinsons disease, risk factors	Europe	No	No	NA	NA	M:153, F:165 in each control.case group	No	NA	No
127	Differential effects of black versus green tea on risk of Parkinson's disease in the Singapore Chinese Health Study.	Tan, Louis C Koh, Woon-Puay Yuan, Jian-Min Wang, Renwei Au, Wing-Lok Tan, June H Tan, Eng-King Yu, Mimi C	2008		Asia	Yes (as target group of study is a racial/ethnic group	Yes (as target group of study is a racial/ethnic group)	Target group of study is a racial/ethnic group	all ethnic Chinese	cohort subjects(n=63,061): 44.2%M, 55.8%F and PD cases(n=157): 59.9%M, 47.1%F	Yes (as target group of study is a racial/ethnic group	Yes and target group of study is a racial/ethnic group	NA
128	Low LDL cholesterol and increased risk of Parkinson's disease: prospective results from Honolulu-Asia Aging Study.	Huang, Xuemei Abbott, Robert D Petrovitch, Helen Mailman, Richard B Ross, G Webster	2008	Parkinson’s disease; LDL cholesterol; apoli-poprotein E, statin, prospective study	North America	Yes (as target group of study is a racial/ethnic group	Yes (as target group of study is a racial/ethnic group)	Target group of study is a racial/ethnic group	Japanese-Americans ( japanese ancestry)	All men (n=3,233) and cases: 41	Yes (as target group of study is a racial/ethnic group	No and target group of study is a racial/ethnic group	NA
129	Recreational physical activity and risk of Parkinson's disease.	Thacker, Evan L Chen, Honglei Patel, Alpa V McCullough, Marjorie L Calle, Eugenia E Thun, Michael J Schwarzschild, Michael A Ascherio, Alberto	2008	Parkinson’s disease; epidemiology; cohort study; behavioral risk factors; physical activity	North America	No	No	NA	NA	Participants: M: 62471, F:78868 and cases: 264M, 145F	No	NA	No
130	Pesticide/environmental exposures and Parkinson's disease in East Texas.	Dhillon, Amanpreet S Tarbutton, G Lester Levin, Jeffrey L Plotkin, George M Lowry, Larry K Nalbone, J Torey Shepherd, Sara	2008		North America	No	Yes (as an integral part of the data analyses)	Each ethnoracial group was analysed distinctly	Controls (n=100): white 98.8%, black: 1.2%. Cases (n=84): White 99%, Black 1%	Cases: 60M, 40F and Controls: 47M, 37F	Yes (as factor)	No	NA
131	Diabetes preceding Parkinson's disease onset. A case-control study.	D'Amelio, Marco Ragonese, Paolo Callari, Graziella Di Benedetto, Norma Palmeri, Barbara Terruso, Valeria Salemi, Giuseppe Famoso, Giorgia Aridon, Paolo Savettieri, Giovanni	2009	Parkinson’s diseaseDiabetesEpidemiologyCase–control studiesRisk factors in epidemiology	Europe	No	No	NA	NA	Cases: 153 M, 165 F Control:153M, 165F	No	NA	No
132	PINK1 mutations in a Brazilian cohort of early-onset Parkinson's disease patients.	Godeiro-Junior, Clecio de Carvalho-Aguiar, Patricia M Felício, Andre C Barsottini, Orlando G P Silva, Sonia M A Borges, Vanderci Andrade, Luiz Augusto F Ferraz, Henrique Ballalai	2009	Parkinson’s disease; early-onset; PINK1	South America	No	Yes (as a control variable/covariate the data analyses)	NA	Adjusted for self-reported ancestry	Cases: 18F, 42M and Controls: 20F, 41F	No	NA	No
133	Antihypertensive agents and risk of Parkinson's disease, essential tremor and dementia: a population-based prospective study (NEDICES).	Louis, Elan D Benito-León, Julián Bermejo-Pareja, Félix	2009	Parkinson’s disease Essential tremor Dementia Epidemiology Calcium channel blockers Antihypertensive agents Hypertension	Europe	No	No	NA	NA	Cases(n=643): 396F and Controls (n=4663): 2662F	No	NA	No		participants from 3 different communities in central spain
134	Smoking and Parkinson's disease: using parental smoking as a proxy to explore causality.	O'Reilly, Eilis J Chen, Honglei Gardener, Hannah Gao, Xiang Schwarzschild, Michael A Ascherio, Alberto	2009	causality; Parkinson disease; smoking; tobacco smoke pollution	North America	No	No	NA	NA	Participants: M: 51529 and F: 121701 and Cases: 287F, 168M	No	NA	No
135	A nationwide population study of severe head injury and Parkinson's disease.	Spangenberg, Søren Hannerz, Harald Tüchsen, Finn Mikkelsen, Kim L	2009	PD risk factor; Prospective analysis; National population; Standardised morbidity rate	Europe	No	No	NA	NA	PD cases: 55M and 52F. Participants: 278601M and 164634F	No	NA	No
136	Racial differences in Parkinson's disease medication use in the reasons for geographic and racial differences in stroke cohort: a cross-sectional study.	Yacoubian, Talene A Howard, George Kissela, Brett Sands, Charles D Standaert, David G	2009	Parkinson’s disease Reasons for Geographic and Racial Differences in Stroke study Cohort studies	North America	Yes (as factor)	Yes (as an integral part of the data analyses)	Each ethnoracial group was analysed distinctly	Population: 41.7% African American (n=10,123), 58.3% white (n=14,242) Cases: 52 African american and 138 white	Population: 45.9%M (n=11,196), 54.1%F (n=13,224) Cases: 109M and 81F	Yes (as factor)	Yes	NA		Attrubuted differences to potential for biological differences and suggested may be social disparities.
137	Incidence and remaining lifetime risk of Parkinson disease in advanced age.	Driver, Jane A Logroscino, Giancarlo Gaziano, J Michael Kurth, Tobias	2009		North America	No	Yes (as descriptives of the sample)	Described and combined with the total sample	92% white self-identified	All men (cases: 563)	Yes (as factor)	No	NA	Self-identified as white
138	Comparison of risk factor profiles in incidental Lewy body disease and Parkinson disease.	Frigerio, Roberta Fujishiro, Hiroshige Maraganore, Demetrius M Klos, Kevin J DelleDonne, Anthony Heckman, Michael G Crook, Julia E Josephs, Keith A Parisi, Joseph E Boeve, Bradley F Dickson, Dennis W Ahlskog, J Eric	2009		North America	No	No	NA	NA	Total N=235: M:44.7% , F: 55.3% (n=130)	No	NA	No
139	Phactr2 and Parkinson's disease.	Wider, Christian Lincoln, Sarah J Heckman, Michael G Diehl, Nancy N Stone, Jeremy T Haugarvoll, Kristoffer Aasly, Jan O Gibson, J Mark Lynch, Timothy Rajput, Alex Rajput, Michele L Uitti, Ryan J Wszolek, Zbigniew K Farrer, Matthew J Ross, Owen A	2009	Genome-wide association; Parkinson's disease; Phactr2	Other	No	Yes (as descriptives of the sample)	Described and combined with the total sample	all Caucasian and ethnicity matched controls for US, Canada, Norwegian and Irish	US (n=251): 51% male, Norwegian (n=312): 59% M, Irish (n=186): 39%M, Canadian (n=461): 61% M and controls (n=247):30% M	No	NA	No		Discussed genes important in some populations and not others
140	Family history of melanoma and Parkinson disease risk.	Gao, X Simon, K C Han, J Schwarzschild, M A Ascherio, A	2009		North America	Yes (as factor)	Yes (as a control variable/covariate the data analyses)	Each ethnoracial group was analysed distinctly	Caucasian, African American. Asian, other Men: fam history of melanoma: 95.7% caucasian and no fam history of melanoma: 97.9% caucasian and Women: fam history of melanoma: 96.2% caucasian and no fam history of melanoma: 98.2% caucasian	M:46,911, F: 110,125	Yes (as factor)	No	NA		Some results restricted to caucasians "to test robustness of our results, we conducted sensitivity analyses by restricting the analyses to PD cases diagnosed by neurologists, and to Caucasians"
141	Genome-wide association study reveals genetic risk underlying Parkinson's disease.	Simón-Sánchez, Javier Schulte, Claudia Bras, Jose M Sharma, Manu Gibbs, J Raphael Berg, Daniela Paisan-Ruiz, Coro Lichtner, Peter Scholz, Sonja W Hernandez, Dena G Krüger, Rejko Federoff, Monica Klein, Christine Goate, Alison Perlmutter, Joel Bonin, Michael Nalls, Michael A Illig, Thomas Gieger, Christian Houlden, Henry Steffens, Michael Okun, Michael S Racette, Brad A Cookson, Mark R Foote, Kell…	2009		Other	Yes (as target group of study is a racial/ethnic group	Yes (as target group of study is a racial/ethnic group)	Target group of study is a racial/ethnic group	Caucasian population of European ancestry and made comparisons to Japanese data trends	Stage 1: Cases: USA (n=988) M/F ratio 1.09, Germany(n=757) M/F ratio 1.49 and Controls: USA(n=3071) M/F ratio 0.96, Germany(n=976) M/F ratio 1.08. Stage 2: Cases: USA(n=1528) M/F ratio 2.44, Germany(n=1100) M/F ratio 1.37, UK(n=824) M/F 3.5 and Controls : USA(n=2044) M/F ratio 2.45, Germany(n=2168) M/F ratio 1.4, UK(n=544) M/F 0.57	Yes (as target group of study is a racial/ethnic group	Yes and target group of study is a racial/ethnic group	NA
142	Genome-wide association study identifies common variants at four loci as genetic risk factors for Parkinson's disease.	Satake, Wataru Nakabayashi, Yuko Mizuta, Ikuko Hirota, Yushi Ito, Chiyomi Kubo, Michiaki Kawaguchi, Takahisa Tsunoda, Tatsuhiko Watanabe, Masahiko Takeda, Atsushi Tomiyama, Hiroyuki Nakashima, Kenji Hasegawa, Kazuko Obata, Fumiya Yoshikawa, Takeo Kawakami, Hideshi Sakoda, Saburo Yamamoto, Mitsutoshi Hattori, Nobutaka Murata, Miho Nakamura, Yusuke Toda, Tatsushi	2009		Asia	Yes (as factor)	Yes (as an integral part of the data analyses)	Each ethnoracial group was analysed distinctly	All Asian ancestry ( Japan) compared to data of those of European ancestry	GWAS: cases (n=1078): M/F ratio 0.82, controls (n=2628): M/F ratio 1.21 and Replication 1: cases (n=612): M/F ratio 1.00, controls (n=14,139): M/F ratio 1.21 and Replication 2: cases (n=321): M/F ratio 0.80, controls (n=1614): M/F ratio 0.81	Yes (as factor)	Yes	NA	European ancestry	Noted population specific differences
143	Racial differences in the diagnosis of Parkinson's disease.	Dahodwala, Nabila Siderowf, Andrew Xie, Ming Noll, Elizabeth Stern, Matthew Mandell, David S	2009	African Americans; epidemiology; healthcare disparities; Medicaid; Parkinson’s disease	North America	Yes (as factor)	Yes (as an integral part of the data analyses)	Each ethnoracial group was analysed distinctly	68% white, 28% African American, 8% Latino	Non-hispanic white( n=123,489): 59.6%F and Black(n=50,808): 64%F and Hispanic(n=7,974): 60.6%	Yes (as factor)	Yes	NA		qualified likelyhood to receive care per ethnic group
144	GRN 3'UTR+78 C>T is not associated with risk for Parkinson's disease.	Jasinska-Myga, B Wider, C Opala, G Krygowska-Wajs, A Barcikowska, M Czyzewski, K Baker, M Rademakers, R Uitti, R J Farrer, M J Ross, O A Wszolek, Z K	2009		Other	Yes (as target group of study is a racial/ethnic group	Yes (as target group of study is a racial/ethnic group)	Target group of study is a racial/ethnic group	all Caucasian	US: PD cases: 226(55%)M and Controls: 213(52%)M Poland: PD cases: 224(62%)M and Controls: 95(40%)	Yes (as target group of study is a racial/ethnic group	Yes and target group of study is a racial/ethnic group	NA		Mentioned importance of undestanding population speciifc fators
145	Risk of incident Parkinson's disease and parkinsonism in essential tremor: a population based study.	Benito-León, J Louis, E D Bermejo-Pareja, F	2009		Europe	No	No	NA	NA	not specified	No	NA	No
146	Serotonin transporter gene polymorphic element 5-HTTLPR increases the risk of sporadic Parkinson's disease in Italy.	Albani, Diego Vittori, Angelica Batelli, Sara Polito, Letizia De Mauro, Stefania Galimberti, Daniela Scarpini, Elio Lovati, Carlo Mariani, Claudio Forloni, Gianluigi	2009		North America	Yes (as target group of study is a racial/ethnic group	Yes (as target group of study is a racial/ethnic group)	Target group of study is a racial/ethnic group	Italian ancestry and caucasian	Controls(n=444)M:F 0.85 and PD(n=393)M:F 0.94	Yes (as target group of study is a racial/ethnic group	Yes and target group of study is a racial/ethnic group	NA
147	Plasma urate and Parkinson's disease in the Atherosclerosis Risk in Communities (ARIC) study.	Chen, Honglei Mosley, Thomas H Alonso, Alvaro Huang, Xuemei	2009	ARIC, Atherosclerosis Risk in Communities; ICD, International Classification of Diseases	North America	Yes (as factor)	Yes (as an integral part of the data analyses)	Each ethnoracial group was analysed distinctly	27% African Americans 73% Caucasian	Participants: 45% M, 55%F	Yes (as factor)	Yes	NA
148	Autoimmune disease and risk for Parkinson disease: a population-based case-control study.	Rugbjerg, K Friis, S Ritz, B Schernhammer, E S Korbo, L Olsen, J H	2009		Europe	No	No	NA	NA	Cases: 7423M(54.2%), 6272F(45.8%) Controls: 37101M(54.2%), 31344F(45.8%)	No	NA	No
149	Dietary fats, cholesterol and iron as risk factors for Parkinson's disease.	Powers, Karen M Smith-Weller, Terri Franklin, Gary M Longstreth, W T Jr Swanson, Phillip D Checkoway, Harvey	2009		North America	Yes (as factor)	Yes (as a control variable/covariate the data analyses)	All ethnoracial groups other than White were considered together	Control(n=560): Non-hispanic caucasians 92.5% and other 7.5%, Cases (n= 420): Non-hispanic caucasians 93.3% and other 6.7%	Control (n=560): 62.7%M, 37.3%F and Cases (n=420): 63.3%M, 36.7%F	Yes (as factor)	No	NA
150	Reproductive factors, exogenous estrogen use, and risk of Parkinson's disease.	Simon, Kelly Claire Chen, Honglei Gao, Xiang Schwarzschild, Michael A Ascherio, Alberto	2009		North America	No	No	NA	NA	All women (n=244 cases)	No	NA	No
151	The heritability of risk and age at onset of Parkinson's disease after accounting for known genetic risk factors.	Hamza, Taye H Payami, Haydeh	2010	Parkinson’s disease; heritability; age at onset; risk; gene; environment	North America	Yes (as target group of study is a racial/ethnic group	Yes (as target group of study is a racial/ethnic group)	Target group of study is a racial/ethnic group	Caucasian population	Affected with PD: Probands =504(60.7%)M, Siblings of probands= 32(59.38%)M, Parents of probands= 56(48.21%)M. Unaffected: Siblings of probands= 1284(51.29%)M, Parents of probands= 948(50%)M	Yes (as target group of study is a racial/ethnic group	Yes and target group of study is a racial/ethnic group	NA
152	Environmental factors and Parkinson's disease: a case-control study in Belgrade, Serbia.	Vlajinac, Hristina D Sipetic, Sandra B Maksimovic, Jadranka M Marinkovic, Jelena M Dzoljic, Eleonora D Ratkov, Isidora S Kostic, Vladimir S	2010	metals and nonmetallic toxins, occupation, Parkinson’s disease (PD), pesticides, well water	Europe	No	No	NA	NA	Control: 57.3%M(126), 42.7%F(94). Cases: 57.3%M(63), 42.7%F(47)	No	NA	No
153	Anxious personality predicts an increased risk of Parkinson's disease.	Bower, James H Grossardt, Brandon R Maraganore, Demetrius M Ahlskog, J Eric Colligan, Robert C Geda, Yonas E Therneau, Terry M Rocca, Walter A	2010	Parkinson’s disease; parkinsonism; anxious personality; pessimistic personality; neuroticism; Minnesota Multiphasic Personality Inventory	North America	No	No	NA	NA	Population: 3313M and 3509F	No	NA	No
154	Serum vitamin D and the risk of Parkinson disease.	Knekt, Paul Kilkkinen, Annamari Rissanen, Harri Marniemi, Jukka Sääksjärvi, Katri Heliövaara, Markku	2010		Europe	No	No	NA	NA	PD cases(N=50): 47.2% and Noncases(N=3123):43.1%	No	NA	No
155	Active and passive smoking and risk of Parkinson's disease.	Tanaka, K Miyake, Yoshihiro Fukushima, W Sasaki, S Kiyohara, C Tsuboi, Y Yamada, T Oeda, T Miki, T Kawamura, N Sakae, N Fukuyama, H Hirota, Y Nagai, M	2010		Asia	Yes (as target group of study is a racial/ethnic group	Yes (as target group of study is a racial/ethnic group)	Target group of study is a racial/ethnic group	Japanese - referred to as culture and referenced Asian population	Cases: 93(37.%)M and Controls: 141(38.2%)M	Yes (as target group of study is a racial/ethnic group	Yes and target group of study is a racial/ethnic group	NA
156	Interaction between ABCB1 and professional exposure to organochlorine insecticides in Parkinson disease.	Dutheil, Fabien Beaune, Philippe Tzourio, Christophe Loriot, Marie-Anne Elbaz, Alexis	2010		Europe	No	No	NA	NA	Cases: 118(57%)M and Controls: 286(59%)	No	NA	No
157	Risk for Parkinson's disease among patients with osteoarthritis: a Danish cohort study.	Rugbjerg, Kathrine Friis, Søren Jørgensen, Thomas L Ritz, Beate Korbo, Lise Olsen, Jørgen H	2010	Parkinson’s disease; anti-inﬂammatory drugs;osteoarthritis	Europe	No	No	NA	NA	Population: 54,624(40.7%)M and 79,552(59.3%)F	No	NA	No
158	Persistent organochlorine pesticides in serum and risk of Parkinson disease.	Weisskopf, M G Knekt, P O'Reilly, E J Lyytinen, J Reunanen, A Laden, F Altshul, L Ascherio, A	2010		Europe	No	No	NA	NA	Cases: 88(51.5%)M and Controls: 192(55%)M	No	NA	No		Population divided by regions of findland
159	Multiple LRRK2 variants modulate risk of Parkinson disease: a Chinese multicenter study.	Tan, Eng-King Peng, Rong Teo, Yik-Ying Tan, Louis C Angeles, Dario Ho, Patrick Chen, Meng-Ling Lin, Chin-Hsien Mao, Xue-Ye Chang, Xue-Li Prakash, Kumar M Liu, Jian-Jun Au, Wing-Lok Le, Wei-Dong Jankovic, Joseph Burgunder, Jean-Marc Zhao, Yi Wu, Ruey-Meei	2010	LRRK2; Parkinson disease; Han; Chinese;kinase	Asia	Yes (as target group of study is a racial/ethnic group	Yes (as target group of study is a racial/ethnic group)	Target group of study is a racial/ethnic group	All asian ethnic Han Chinese	combined analysis: Cases (n=1363): 55%M and Controls(n=1251): 51%M	Yes (as target group of study is a racial/ethnic group	Yes and target group of study is a racial/ethnic group	NA		compared results to caucasian data
160	Occurrence of depression and anxiety prior to Parkinson's disease.	Jacob, E L Gatto, N M Thompson, A Bordelon, Y Ritz, B	2010	Case control study; Depression; Parkinson’s disease; Pre-motor phase; Risk factors in epidemiology	North America	Yes (as factor)	Yes (as a control variable/covariate the data analyses)	Each ethnoracial group was analysed distinctly	Mostly Caucasian, also had Black, Latino, Asian and Native American all less than 14% Cases:299(80.1%)W, 3(0.8%)B, 49(13.2%)L, 4(1.1%)A, 16(4.3%)NA. CP: 315(78.4%)W, 16(4.0%)B, 42(10.4%)L, 11(2.7%)A, 18(4.5%)NA. CS:96(83.5%)W, 1(0.9%)B, 7(6.1%)L, 1(0.9%)A, 10(8.7%)NA	Cases: 208(56.1%)M, 163(43.9%)F. Controls(population) : 200(49.8%)M, 202(50.2%)F. Controls(sibling): 47(40.9%)M, 68(59.1%)F+M161	Yes (as factor)	No	NA
161	Incidence of Parkinson's disease and atypical parkinsonism: Russian population-based study.	Winter, Yaroslav Bezdolnyy, Yury Katunina, Elena Avakjan, Gagik Reese, Jens P Klotsche, Jens Oertel, Wolfgang H Dodel, Richard Gusev, Eugene	2010	Parkinson’s disease; progressive supranuclearpalsy; multiple system atrophy; incidence; epidemiology	Europe	No	No	NA	NA	PD cases: 168(54.5%)F and 140(45.5%)M	No	NA	No		Mentioned significance of geographic area Asia vs. Western areas
162	Occupational factors and risk of Parkinson's disease: A population-based case-control study.	Firestone, Jordan A Lundin, Jessica I Powers, Karen M Smith-Weller, Terri Franklin, Gary M Swanson, Phillip D Longstreth, W T Jr Checkoway, Harvey	2010	risk factors in epidemiology; Parkinson’s disease/parkinsonism; toxicology; occupational; human	North America	No	Yes (as a control variable/covariate the data analyses)	All ethnoracial groups other than White were considered together	Control: Non-Hispanic white: 92%, Other: 8%. Cases: Non-Hispanic White: 93.6%, Other: 6.4%	Control(n=526): 62%M, 38%F. Cases (n=404):62.4%M, 37.6%F	Yes (as factor)	Yes	NA		Included ethnicity as adjusting for confound, ethnicity of study and source population similar - doestnt say referece pop/controls
163	Metal emissions and urban incident Parkinson disease: a community health study of Medicare beneficiaries by using geographic information systems.	Willis, Allison W Evanoff, Bradley A Lian, Min Galarza, Aiden Wegrzyn, Andrew Schootman, Mario Racette, Brad A	2010	copper; heavy metal poisoning, nervous system; incidence; lead; manganese; Parkinson disease; risk; urban population	North America	Yes (as factor)	Yes (as an integral part of the data analyses)	Each ethnoracial group was analysed distinctly	A race standardized population was used. Demographics showed incidence of PD as 89.3% white, 5.9% black, 2.4% Hispanic, 1.3% asian. Population demographics: 92.1% white, 3.6% black, 2.2% Hispanic, 2.1% asian "lower incidence among Asians and blacks but a similar rate among Hispanics,...blacks (incidence ratio (IR) ¼ 0.60, 95% confidence interval (CI): 0.58, 0.63); Asians (IR ¼ 0.62, 95% CI: 0.57,…	Population: 2,685,857(52.3%)M and 2,452,791(47.7%)F.	Yes (as factor)	No	NA
164	Novelty seeking and introversion do not predict the long-term risk of Parkinson disease.	Arabia, G Grossardt, B R Colligan, R C Bower, J H Maraganore, D M Ahlskog, J E Geda, Y E Rocca, W A	2010		North America	No	No	NA	NA	Population: 3313M and 3509F	No	NA	No
165	Association of fibrinogen with Parkinson disease in elderly Japanese-American men: a prospective study.	Wong, K T Grove, J S Grandinetti, A Curb, J D Yee, M Blanchette, P Ross, G W Rodriguez, B I	2010	Fibrinogen Parkinson disease Asian-Americans	North America	Yes (as target group of study is a racial/ethnic group	Yes (as target group of study is a racial/ethnic group)	Target group of study is a racial/ethnic group	Japanese-Americans	all men (n=3,741)	Yes (as target group of study is a racial/ethnic group	No and target group of study is a racial/ethnic group	NA
166	Incidence of Parkinson's disease and parkinsonism in northern Sweden: a population-based study.	Linder, Jan Stenlund, Hans Forsgren, Lars	2010	Parkinson’s disease; parkinsonism; incidence; population-based; epidemiology	Europe	No	No	NA	NA	Population: 70,794M and Cases:76M and 62F	No	NA	No
167	The risk of Parkinson's disease in type 1 Gaucher disease.	Bultron, Gilberto Kacena, Katherine Pearson, Daniel Boxer, Michael Yang, Ruhua Sathe, Swati Pastores, Gregory Mistry, Pramod K	2010		North America	No	Yes (as descriptives of the sample)	Each ethnoracial group was analysed distinctly	Primarily Ashkenazi (399/ 91%), a few non-ashkenazi (34/9%)	patients: 234(52.7%)F and 210(47.3%)M	Yes (as factor)	Yes	NA
168	Physical activities and future risk of Parkinson disease.	Xu, Q Park, Y Huang, X Hollenbeck, A Blair, A Schatzkin, A Chen, H	2010		North America	No	Yes (as a control variable/covariate the data analyses)	All ethnoracial groups other than White were considered together	Mostly white, descirbed as white or other for each level of physical activity Light activity: never/rarely( 91% white, 7.8 other, 1.2 missing), 1-3(92.8%W, 6.3%O, 0.9M), >7(94.3%W, 4.8%O, 0.9%). Moderate to vigourous: never/rarely(91.2%W, 7.9%O, 0.9M), 1-3(93.4%W, 5.7%O, 0.9M), >7(94.1%W, 5.0%O, 0.9%)	Light activity: never/rarely(n=15,802):75.2%M, 1-3(n=49,657):62.6%M, >7(n=72,070):49.2%M. Moderate to vigourous: never/rarely(n=27,740):57%M, 1-3(n=54,059):57.4%M, >7(n=52,318):58.6%M	Yes (as factor)	Yes	NA		Mentioned difficult to generalize to other populations cause study in white ethnic group
169	Major life events and risk of Parkinson's disease.	Rod, Naja Hulvej Hansen, Johnni Schernhammer, Eva Ritz, Beate	2010	Life change events; Parkinson disease; Psychological stress	Europe	No	No	NA	NA	Cases: 7423M and 6272F and Controls: 37,101M and 31,344F	No	NA	No
170	Environmental and familial risk factors of Parkinsons disease: case-control study.	Sanyal, Jaya Chakraborty, D P Sarkar, Biswanath Banerjee, Tapas Kumar Mukherjee, Subhash Chandra Ray, Bidhan Chandra Rao, V R	2010		Asia	No	No	NA	NA	Cases: 140 M, 35 F and 350 sex and age matched controls ( 2 for each case)	No	NA	No		Mentioned incidence of PD is lower in India compared to Western areas
171	Depression and the subsequent risk of Parkinson's disease in the NIH-AARP Diet and Health Study.	Fang, Fang Xu, Qun Park, Yikyung Huang, Xuemei Hollenbeck, Albert Blair, Aaron Schatzkin, Arthur Kamel, Freya Chen, Honglei	2010	depression; Parkinson’s disease; odds ratio	North America	No	No	NA	NA	Cases: 744M and 248F, Controls: 164,491M and 115,467F	No	NA	No
172	Familial aggregation of Parkinson's disease in a multiethnic community-based case-control study.	Shino, Michael Y McGuire, Valerie Van Den Eeden, Stephen K Tanner, Caroline M Popat, Rita Leimpeter, Amethyst Bernstein, Allan L Nelson, Lorene M	2010	Parkinson's disease; risk factors; family history; case-control; epidemiology	North America	Yes (as factor)	Yes (as an integral part of the data analyses)	Each ethnoracial group was analysed distinctly	Control: White non-Hispanic(n=366) 82%, White Hispanic(n=28) 6%, African American(n=33) 7%, Asian (n=17)4%, Other(n=1) 1%. Cases: White non-Hispanic (n=334) 83%, White Hispanic (n=12) 3%, African American (n=29) 7%, Asian (n=22) 6%, Other (n=3)1%.	Control (n=448): 60% M, 40%F. Cases (n=400): 60% M, 40%F	Yes (as factor)	Yes	NA	Self-reported
173	Epidemiology of Parkinson disease in the city of Kolkata, India: a community-based study.	Das, S K Misra, A K Ray, B K Hazra, A Ghosal, M K Chaudhuri, A Roy, T Banerjee, T K Raut, D K	2010		Asia	Yes (as target group of study is a racial/ethnic group	Yes (as target group of study is a racial/ethnic group)	Target group of study is a racial/ethnic group	Said India is multiethnic - said their population results are in line with other Asian populations	Population: 53,209M (cases: 18) and 47,593F( cases:23)	Yes (as target group of study is a racial/ethnic group	Yes and target group of study is a racial/ethnic group	NA		Mentioned race/ethnic factors could influence incidence rates
174	Incidence of Parkinson's disease in Bulgaria.	Hristova, Dimka Zachariev, Zahari Mateva, Nonka Grozdev, Ivan	2010		Europe	No	No	NA	NA	Population: 343,375(48.28%)M and 367,779(51.72%)F	No	NA	No
175	Incidence of Parkinson's disease among hospital patients with methamphetamine-use disorders.	Callaghan, Russell C Cunningham, James K Sajeev, Gautam Kish, Stephen J	2010	methamphetamine; Parkinson’s disease; parkinsonism; incidence; longitudinal	North America	No	Yes (as a control variable/covariate the data analyses)	Each ethnoracial group was analysed distinctly	White (n=38757), Black (n=2030), Hispanic (n=6051), Other (n=5142)	Population(n=51980): 24240F	Yes (as factor)	No	NA
176	Prenatal and early life factors and risk of Parkinson's disease.	Gardener, Hannah Gao, Xiang Chen, Honglei Schwarzschild, Michael A Spiegelman, Donna Ascherio, Alberto	2010	Birth weight; Epidemiology; Functional laterality; Maternal exposure; Parkinson disease; Prenatal exposure delayed effects; Risk factors	North America	No	No	NA	NA	M: 51529, F:121701	No	NA	No
177	Dietary glycemic index is inversely associated with the risk of Parkinson's disease: a case-control study in Japan.	Murakami, Kentaro Miyake, Yoshihiro Sasaki, Satoshi Tanaka, Keiko Fukushima, Wakaba Kiyohara, Chikako Tsuboi, Yoshio Yamada, Tatsuo Oeda, Tomoko Miki, Takami Kawamura, Nobutoshi Sakae, Nobutaka Fukuyama, Hidenao Hirota, Yoshio Nagai, Masaki	2010	Glycemic index; Glycemic load; Parkinson’s disease; Japan; Case–control study	Asia	No	No	NA	NA	Cases(n=249): 93(37.4%)M and Controls(n=368): 141(38.35)%M	No	NA	No		participant breakdown by janpanese region
178	Analysis of mutations and the association between polymorphisms in the cerebral dopamine neurotrophic factor (CDNF) gene and Parkinson disease.	Choi, Jung-Mi Hong, Jung-Hoon Chae, Min-Joo Ngyuen, Phuoc Hung Kang, Hyun-Sook Ma, Hyeo-Il Kim, Yun Joong	2011		Asia	No	Yes (as descriptives of the sample)	Described and combined with the total sample	Korean	Controls (n=215): 40.94% M and PD cases(n=215): 40.94%M	Yes (as factor)	Yes	NA
179	Intake of Japanese and Chinese teas reduces risk of Parkinson's disease.	Tanaka, Keiko Miyake, Yoshihiro Fukushima, Wakaba Sasaki, Satoshi Kiyohara, Chikako Tsuboi, Yoshio Yamada, Tatsuo Oeda, Tomoko Miki, Takami Kawamura, Nobutoshi Sakae, Nobutaka Fukuyama, Hidenao Hirota, Yoshio Nagai, Masaki	2011		Asia	Yes (as target group of study is a racial/ethnic group	Yes (as target group of study is a racial/ethnic group)	Target group of study is a racial/ethnic group	Asian - Japanese/Chinese	Cases(n=249):93(37.4%) and Controls(n=368): 141(38.2%)	Yes (as target group of study is a racial/ethnic group	Yes and target group of study is a racial/ethnic group	NA
180	DMT1 polymorphism and risk of Parkinson's disease.	He, Qing Du, Tingting Yu, Xiaojun Xie, Anmu Song, Ning Kang, Qi Yu, Jintai Tan, Lan Xie, Junxia Jiang, Hong	2011	Parkinson’s disease, DMT1, Polymorphism	Asia	Yes (as target group of study is a racial/ethnic group	Yes (as target group of study is a racial/ethnic group)	Target group of study is a racial/ethnic group	Han Chinese	Controls: 112M, 81F and PD cases: 114M and 78F	Yes (as target group of study is a racial/ethnic group	No and target group of study is a racial/ethnic group	NA
181	Occupational risk factors for Parkinson's disease: a case-control study in Japan.	Tanaka, Keiko Miyake, Yoshihiro Fukushima, Wakaba Sasaki, Satoshi Kiyohara, Chikako Tsuboi, Yoshio Yamada, Tatsuo Oeda, Tomoko Miki, Takami Kawamura, Nobutoshi Sakae, Nobutaka Fukuyama, Hidenao Hirota, Yoshio Nagai, Masaki	2011		Asia	No	No	NA	NA	Control(n=369): 141(38.2%)M Cases(n=249): 93(37.4%)M	No	NA	No
182	Use of ibuprofen and risk of Parkinson disease.	Gao, Xiang Chen, Honglei Schwarzschild, Michael A Ascherio, Alberto	2011		North America	No	Yes (as descriptives of the sample)	NA	NA	M:30,305, F: 98,892	No	NA	No		Collected info on ethncity, not reported
183	APOE and CYP2E1 polymorphisms, alcohol consumption, and Parkinson's disease in a Japanese population.	Kiyohara, Chikako Miyake, Yoshihiro Koyanagi, Midori Fujimoto, Takahiro Shirasawa, Senji Tanaka, Keiko Fukushima, Wakaba Sasaki, Satoshi Tsuboi, Yoshio Yamada, Tatsuo Oeda, Tomoko Miki, Takami Kawamura, Nobutoshi Sakae, Nobutaka Fukuyama, Hidenao Hirota, Yoshio Nagai, Masaki	2011	Apolipoprotein E Cytochrome P450 2E1 Interaction Parkinson’s disease Case-control study Japanese population	Asia	Yes (as target group of study is a racial/ethnic group	Yes (as target group of study is a racial/ethnic group)	Target group of study is a racial/ethnic group	Japanese	cases(n=238): 91(38.2%)M, 147(61.8%)F and Controls (n=296): 114(38.5%)M, 182(61.5%)F	Yes (as target group of study is a racial/ethnic group	Yes and target group of study is a racial/ethnic group	NA		Described effects in Asian in populations and ot Caucasians suggesting gene-environement effects
184	Osteopontin polymorphic susceptibility factor for Parkinson's disease among patients with Gaucher disease.	Ribner, Avigayil Altarescu, Gheona Zimran, Ari Elstein, Deborah	2011	osteopontin; Parkinson’s disease; Gaucherdisease; polymorphic variants	Asia	No	No	NA	NA	PD Cases: 7(70%)M and NonPD: 34(56.7%)M	No	NA	No
185	Association of blood pressure and hypertension with the risk of Parkinson disease: the National FINRISK Study.	Qiu, Chengxuan Hu, Gang Kivipelto, Miia Laatikainen, Tiina Antikainen, Riitta Fratiglioni, Laura Jousilahti, Pekka Tuomilehto, Jaakko	2011	blood pressurehypertensionParkinson diseasesexprospective study	Europe	No	No	NA	NA	Population: 28, 725M and 30, 815F	No	NA	No
186	Relation of risk factors and putative premotor markers for Parkinson's disease.	Liepelt-Scarfone, I Behnke, S Godau, J Schweitzer, K J Wolf, B Gaenslen, A Berg, D	2011	Transcranial ultrasound Premotor phase Parkinson’s disease Risk factors	Europe	No	No	NA	NA	Participants (n=1149): 58.1%M	No	NA	No
187	Lrrk2 S1647T and BDNF V66M interact with environmental factors to increase risk of Parkinson's disease.	Lin, Chin-Hsien Wu, Ruey-Meei Tai, Chun-Hwei Chen, Meng-Ling Hu, Fu-Chang	2011	Parkinson’s disease LRRK2 BDNF PINK1 Pesticide	Asia	Yes (as target group of study is a racial/ethnic group	Yes (as target group of study is a racial/ethnic group)	Target group of study is a racial/ethnic group	Taiwanese - ethnic Chinese	PD cases: 258(56.9%) and Controls:129(44.3%)M	Yes (as target group of study is a racial/ethnic group	Yes and target group of study is a racial/ethnic group	NA
188	A prospective study of bowel movement frequency and risk of Parkinson's disease.	Gao, Xiang Chen, Honglei Schwarzschild, Michael A Ascherio, Alberto	2011	constipation; Parkinson disease; prospective studies	North America	No	No	NA	NA	33901M, 93767F	No	NA	No
189	Diabetes and risk of Parkinson's disease.	Xu, Qun Park, Yikyung Huang, Xuemei Hollenbeck, Albert Blair, Aaron Schatzkin, Arthur Chen, Honglei	2011		North America	No	Yes (as a control variable/covariate the data analyses)	All ethnoracial groups other than White were considered together	Diabetes: White - 87.3% Nonwhite - 11.3%. Non-diabetes: White - 93.2%, Nonwhite - 5.9%	Diabetes (n=21,611): 66.6%M, non diabetes (n=267,051): 57.5%M	Yes (as factor)	Yes	NA		race as a potentail confounder
190	Dietary intake of metals and risk of Parkinson's disease: a case-control study in Japan.	Miyake, Yoshihiro Tanaka, Keiko Fukushima, Wakaba Sasaki, Satoshi Kiyohara, Chikako Tsuboi, Yoshio Yamada, Tatsuo Oeda, Tomoko Miki, Takami Kawamura, Nobutoshi Sakae, Nobutaka Fukuyama, Hidenao Hirota, Yoshio Nagai, Masaki	2011	Dietary intake of metals and risk of Parkinson's disease: A case-control study in JapanYoshihiro Miyakea,⁎, Keiko Tanakaa, Wakaba Fukushimab, Satoshi Sasakic, Chikako Kiyoharad,Yoshio Tsuboie, Tatsuo Yamadae, Tomoko Oedaf, Takami Mikig, Nobutoshi Kawamurah, Nobutaka Sakaeh,Hidenao Fukuyamai, Yoshio Hirotab, Masaki Nagaijand Fukuoka Kinki Parkinson's Disease Study Group1aDepartment of Public Healt…	Asia	No	No	NA	NA	Cases(n=249):93(37.4%)M, 156(62.7%)F and Controls(n=368): 141(38.3%)M and 227(61.7%)F	No	NA	No
191	Pesticide exposure and risk of Parkinson's disease--a population-based case-control study evaluating the potential for recall bias.	Rugbjerg, Kathrine Harris, M Anne Shen, Hui Marion, Stephen A Tsui, Joseph K C Teschke, Kay	2011	agricultural job; British Columbia; Canada; job history; self-report	North America	No	No	NA	NA	Cases: 266(66%)M and 137(34%)F and Controls: 204(50.4%)M and 201(49.6%)F	No	NA	No
192	Parkinson's disease or Parkinson symptoms following seasonal influenza.	Toovey, Stephen Jick, Susan S Meier, Christoph R	2011	Case–control studies, influenza, Parkinson’s disease, parkinsonism	Europe	No	No	NA	NA	Cases: 2327(58.5%)M and 1649(41.5%)F and Controls: 9299(58.5%)M and 6592(41.5%)F	No	NA	No
193	Reproductive factors and Parkinson's disease: a multicenter case-control study.	Nicoletti, Alessandra Nicoletti, Giuseppe Arabia, Gennarina Annesi, Grazia De Mari, Michele Lamberti, Paolo Grasso, Lucia Marconi, Roberto Epifanio, Antonio Morgante, Letterio Cozzolino, Autilia Barone, Paolo Quattrone, Aldo Zappia, Mario	2011	Parkinson’s disease; reproductive factors; case-control study	Europe	No	No	NA	NA	All women( n=200 cases and 299controls )	No	NA	No
194	Serum insulinlike growth factor 1 as possible marker for risk and early diagnosis of Parkinson disease.	Godau, Jana Knauel, Katharina Weber, Karin Brockmann, Kathrin Maetzler, Walter Binder, Gerhard Berg, Daniela	2011		Europe	No	No	NA	NA	Controls: 99M and 40F, Cases: 9M and 6F	No	NA	No
195	Mutations in the glucocerebrosidase gene confer a risk for Parkinson disease in North Africa.	Lesage, S Condroyer, C Hecham, N Anheim, M Belarbi, S Lohman, E Viallet, F Pollak, P Abada, M Dürr, A Tazir, M Brice, A	2011		Other	Yes (as factor)	Yes (as a control variable/covariate the data analyses)	Described and combined with the total sample	Ethnically matched controls - North African ancestry	Cases(n=194): 52%M and Controls(n=177): 39%M	No	NA	No
196	Diabetes and the risk of developing Parkinson's disease in Denmark.	Schernhammer, Eva Hansen, Johnni Rugbjerg, Kathrine Wermuth, Lene Ritz, Beate	2011		Europe	No	No	NA	NA	Cases:810(41.9%)F, 1,121(58.1%)M and Controls: 4048(41.9%)F and 5603(58.1%)M	No	NA	No
197	Role of familial, environmental and occupational factors in the development of Parkinson's disease.	Das, Kamalesh Ghosh, Mrinalkanti Nag, Chiranjib Nandy, Sankar P Banerjee, Mousumi Datta, Monotosh	2011		Asia	No	No	NA	NA	Cases: 215M,130F and Controls: 220M and 150F	No	NA	No		compared incidence and prevalence of PD from India to Western and North american countries
198	Genome-wide association study confirms BST1 and suggests a locus on 12q24 as the risk loci for Parkinson's disease in the European population.	Saad, Mohamad Lesage, Suzanne Saint-Pierre, Aude Corvol, Jean-Christophe Zelenika, Diana Lambert, Jean-Charles Vidailhet, Marie Mellick, George D Lohmann, Ebba Durif, Franck Pollak, Pierre Damier, Philippe Tison, François Silburn, Peter A Tzourio, Christophe Forlani, Sylvie Loriot, Marie-Anne Giroud, Maurice Helmer, Catherine Portet, Florence Amouyel, Philippe Lathrop, Mark Elbaz, Alexis Durr, Al…	2011		Other	Yes (as target group of study is a racial/ethnic group	Yes (as target group of study is a racial/ethnic group)	Target group of study is a racial/ethnic group	European orgin (stage 1) & all Caucasian (stage 3)	Cases: Stage 1(n=1039) M:F 1.42, Stage 2(n=1705) M:F 1.37, Stage 3(n=1527) M:F 1.42 Controls: Stage 1(n=1984) M:F 1.33, Stage 2(n=5200)M:F 1.02, Stage 3(n=1864) M:F 1.05	Yes (as target group of study is a racial/ethnic group	Yes and target group of study is a racial/ethnic group	NA
199	Non-steroidal anti-inflammatory drug use and the risk of Parkinson's disease.	Manthripragada, Angelika D Schernhammer, Eva S Qiu, Jiaheng Friis, Soren Wermuth, Lene Olsen, Jorgen H Ritz, Beate	2011	Parkinson’s disease Case-control study Anti-inflammatory drugs	Europe	No	Yes (as descriptives of the sample)	Described and combined with the total sample	Caucasian	Cases: 1,121M and 810F, Controls: 5,603M and 4,048F	No	NA	Yes		Omitted adjusting for race/ethnicity because population primarily Caucasian
200	Lack of association between IL-1β, TNF-α, and IL-10 gene polymorphisms and sporadic Parkinson's disease in an Italian cohort.	Pascale, E Passarelli, E Purcaro, C Vestri, A R Fakeri, A Guglielmi, R Passarelli, F Meco, G	2011	cytokine; IL-1b; IL10; Parkinsons disease; polymorphism; TNF-a	Europe	No	No	NA	NA	Control: 74 M, 81F, Cases: 88M, 58F	No	NA	No		disscussed allele frquency in different ethnic groups seen in order studies
201	The risk of Parkinson disease associated with urate in a community-based cohort of older adults.	Jain, S Ton, T G Boudreau, R M Yang, M Thacker, E L Studenski, S Longstreth, W T Jr Strotmeyer, E S Newman, A B	2011	The risk of Parkinson disease associated with urate in a community-based cohort of older adults.	North America	No	Yes (as a control variable/covariate the data analyses)	Each ethnoracial group was analysed distinctly	Caucasian (84.2%). African American and Other	Population: 2,434M and 3315F	Yes (as factor)	No	NA
202	A national registry to determine the distribution and prevalence of Parkinson's disease in Thailand: implications of urbanization and pesticides as risk factors for Parkinson's disease.	Bhidayasiri, Roongroj Wannachai, Natnipa Limpabandhu, Sudaratana Choeytim, Supaporn Suchonwanich, Yolsilp Tananyakul, Samart Tharathep, Chanvit Panjapiyakul, Pornpet Srismith, Renu Chimabutra, Kanittha Phanthumchinda, Kammant Asawavichienjinda, Thanin	2011		Asia	Yes (as target group of study is a racial/ethnic group	Yes (as target group of study is a racial/ethnic group)	Target group of study is a racial/ethnic group	Thai	Not specified	Yes (as target group of study is a racial/ethnic group	Yes and target group of study is a racial/ethnic group	NA
203	Enlarged substantia nigra hyperechogenicity and risk for Parkinson disease: a 37-month 3-center study of 1847 older persons.	Berg, Daniela Seppi, Klaus Behnke, Stefanie Liepelt, Inga Schweitzer, Katherine Stockner, Heike Wollenweber, Frank Gaenslen, Alexandra Mahlknecht, Philipp Spiegel, Jörg Godau, Jana Huber, Heiko Srulijes, Karin Kiechl, Stefan Bentele, Marianna Gasperi, Arno Schubert, Teresa Hiry, Teresa Probst, Mareike Schneider, Vera Klenk, Jochen Sawires, Martin Willeit, Johann Maetzler, Walter Fassbender, Klaus…	2011		Other	No	No	NA	NA	Population(n=1535): 824(53.7%)M	No	NA	No
204	Variants in estrogen-related genes and risk of Parkinson's disease.	Chung, Sun Ju Armasu, Sebastian M Biernacka, Joanna M Lesnick, Timothy G Rider, David N Cunningham, Julie M Maraganore, Demetrius M	2011		North America	No	Yes (as descriptives of the sample)	Described and combined with the total sample	Self-reported ancenstry from areas of Europe and Caucasians. PD cases: both European(931/84.4%), one parent euro origin (113/10.2%), one parent american(3/0.3%), both parents american(32/2.9%), Asian(8/0.7%), Mexican(2/0.2%), unknown( 14/1.3%). All controls: both European(948/85.9%), one parent euro (102/9.2%), one parent american(5/0.5%), both parents american(27/2.4%), Asian(3/0.3%), Mexican(2/…	All case- control pairs= PD cases: 707(64.1%)M and 396(35.9%)F, All controls: 619(56.1%)M and 484(43.9%)F	No	NA	No	Self-reported ancestry
205	Lack of association of dairy food, calcium, and vitamin D intake with the risk of Parkinson's disease: a case-control study in Japan.	Miyake, Y Tanaka, K Fukushima, W Sasaki, S Kiyohara, C Tsuboi, Y Yamada, T Oeda, T Miki, T Kawamura, N Sakae, N Fukuyama, H Hirota, Y Nagai, M	2011	CalciumCase-control studyDairy foodsParkinson’s diseaseVitamin D	Asia	No	No	NA	NA	Cases(n=249):93(37.4%)M, 156(62.7%)F and Controls(n=368): 141(38.3%)M and 227(61.7%)F	No	NA	No
206	Genome wide assessment of young onset Parkinson's disease from Finland.	Hernandez, Dena G Nalls, Michael A Ylikotila, Pauli Keller, Margaux Hardy, John A Majamaa, Kari Singleton, Andrew B	2012		Europe	Yes (as target group of study is a racial/ethnic group	Yes (as target group of study is a racial/ethnic group)	Target group of study is a racial/ethnic group	Finnish ancestry, european ancestry	Sex self reported but not included ( did not include gender as a covariate)	Yes (as target group of study is a racial/ethnic group	Yes and target group of study is a racial/ethnic group	NA
207	Brain-derived neurotrophic factor (BDNF) genetic polymorphism greatly increases risk of leucine-rich repeat kinase 2 (LRRK2) for Parkinson's disease.	Liu, Jia Zhou, Yongtao Wang, Chaodong Wang, Tao Zheng, Zheng Chan, Piu	2012	Brain-derived neurotrophic factor (BDNF)Leucine-rich repeat kinase 2 (LRRK2)Parkinson’s disease (PD)Genetic association	Asia	Yes (as target group of study is a racial/ethnic group	Yes (as target group of study is a racial/ethnic group)	Target group of study is a racial/ethnic group	Chinese - Asian population	Cases: 186F and 278M, Controls: 226Fand 323M	Yes (as target group of study is a racial/ethnic group	Yes and target group of study is a racial/ethnic group	NA
208	Traumatic brain injury, paraquat exposure, and their relationship to Parkinson disease.	Lee, Pei-Chen Bordelon, Yvette Bronstein, Jeff Ritz, Beate	2012		North America	No	Yes (as a control variable/covariate the data analyses)	All ethnoracial groups other than White were considered together	Control: Caucasian - 70% 30% non-caucasian. Cases: Caucasian 80.4 %, 19.6% non-caucasian	Control(n=754): 46.7%M. 53.3%F. Cases(n=357): 57.4%M, 42.6%F	Yes (as factor)	No	NA
209	Environmental tobacco smoke and Parkinson's disease.	Searles Nielsen, Susan Gallagher, Lisa G Lundin, Jessica I Longstreth, W T Jr Smith-Weller, Terri Franklin, Gary M Swanson, Phillip D Checkoway, Harvey	2012	Environmental Tobacco Smoke Pollution; Idiopathic Parkinson Disease; Passive Smoking; Smoking	North America	No	Yes (as a control variable/covariate the data analyses)	All ethnoracial groups other than White were considered together	Non-hispanic caucasian (91% cases, 93% controls) versus other	Cases(n=154): 66%M and Controls(n=173): 69%M	Yes (as factor)	No	NA
210	Probable rapid eye movement sleep behavior disorder increases risk for mild cognitive impairment and Parkinson disease: a population-based study.	Boot, Brendon P Boeve, Bradley F Roberts, Rosebud O Ferman, Tanis J Geda, Yonas E Pankratz, V Shane Ivnik, Robert J Smith, Glenn E McDade, Eric Christianson, Teresa J H Knopman, David S Tangalos, Eric G Silber, Michael H Petersen, Ronald C	2012	sleep disorders; parasomnias; dementia; Alzheimer’s disease; dementia with Lewy bodies; parkinsonism; synuclein	North America	No	No	NA	NA	Population: 455(69.9%)M	No	NA	No
211	LRRK2 A419V is not associated with Parkinson's disease in different Chinese populations.	Wu, Yih Ru Tan, Louis C Fu, Xiaoli Chen, Chiung Mei Au, Wing Lok Chen, Ling Chen, Yi Chun Prakash, Kumar M Zheng, Yifan Lee-Chen, Guey-Jen Zhao, Yi Zeng, Jin-Sheng Tan, Eng King Pei, Zhong	2012		Asia	Yes (as target group of study is a racial/ethnic group	Yes (as target group of study is a racial/ethnic group)	Target group of study is a racial/ethnic group	Chinese, Asian	Not specfied ( 1517 cases and 1487 sex matched controls but breakdown not provided)	Yes (as target group of study is a racial/ethnic group	Yes and target group of study is a racial/ethnic group	NA
212	Genetic risk for Parkinson's disease correlates with alterations in neuronal manganese sensitivity between two human subjects.	Aboud, Asad A Tidball, Andrew M Kumar, Kevin K Neely, M Diana Ess, Kevin C Erikson, Keith M Bowman, Aaron B	2012		Unknown	No	No	NA	NA	Both male (n=2)	No	NA	No
213	Dietary patterns and risk of Parkinson's disease: a case-control study in Japan.	Okubo, H Miyake, Y Sasaki, S Murakami, K Tanaka, K Fukushima, W Kiyohara, C Tsuboi, Y Yamada, T Oeda, T Shimada, H Kawamura, N Sakae, N Fukuyama, H Hirota, Y Nagai, M	2012		Asia	No	No	NA	NA	Cases(n=249): 37.4%M, 62.7%F and Controls(n=368): 38.3%M and 61.7%F	No	NA	No
214	UCHL1 S18Y variant is a risk factor for Parkinson's disease in Japan.	Miyake, Yoshihiro Tanaka, Keiko Fukushima, Wakaba Kiyohara, Chikako Sasaki, Satoshi Tsuboi, Yoshio Yamada, Tatsuo Oeda, Tomoko Shimada, Hiroyuki Kawamura, Nobutoshi Sakae, Nobutaka Fukuyama, Hidenao Hirota, Yoshio Nagai, Masaki	2012		Asia	Yes (as target group of study is a racial/ethnic group	Yes (as target group of study is a racial/ethnic group)	Target group of study is a racial/ethnic group	Japanese	Cases: 88(38.4%)M, 141(61.6%)F and Controls: 139(38.9%)M, 218(61.1%)F	Yes (as target group of study is a racial/ethnic group	Yes and target group of study is a racial/ethnic group	NA		compared frequencies to caucasian popualtion
215	Role of tau kinases (CDK5R1 and GSK3B) in Parkinson's disease: a study from India.	Das, Gautami Misra, Amar K Das, Shyamal K Ray, Kunal Ray, Jharna	2012	CDK5R1;GSK3B; Gene-gene interaction;MAPT; Parkinson’s disease (PD); SNP	Asia	Yes (as target group of study is a racial/ethnic group	Yes (as target group of study is a racial/ethnic group)	Target group of study is a racial/ethnic group	Indian, Asian	Cases(n=373): 27.07%F and Controls(n=346): 28.32%F	Yes (as target group of study is a racial/ethnic group	Yes and target group of study is a racial/ethnic group	NA
216	Solvent exposures and Parkinson disease risk in twins.	Goldman, Samuel M Quinlan, Patricia J Ross, G Webster Marras, Connie Meng, Cheryl Bhudhikanok, Grace S Comyns, Kathleen Korell, Monica Chade, Anabel R Kasten, Meike Priestley, Benjamin Chou, Kelvin L Fernandez, Hubert H Cambi, Franca Langston, J William Tanner, Caroline M	2012		North America	No	No	NA	NA	All men (198 PD disordant pairs)	No	NA	No
217	Association of sequence alterations in the putative promoter of RAB7L1 with a reduced parkinson disease risk.	Gan-Or, Ziv Bar-Shira, Anat Dahary, Dvir Mirelman, Anat Kedmi, Merav Gurevich, Tanya Giladi, Nir Orr-Urtreger, Avi	2012		Asia	Yes (as target group of study is a racial/ethnic group	Yes (as target group of study is a racial/ethnic group)	Target group of study is a racial/ethnic group	Ashkenzi Jewish	Cases(n=720): 62.6%M and Controls(n=642): 62.9%M	Yes (as target group of study is a racial/ethnic group	Yes and target group of study is a racial/ethnic group	NA	Origin is Ashkenzi Jewish
218	Association study of SCARB2 rs6812193 polymorphism with Parkinson's disease in Han Chinese.	Chen, Shuai Zhang, Yu Chen, Wei Wang, Ying Liu, Jun Rong, Tian-Yi Ma, Jian-Fang Wang, Gang Zhang, Jing Pan, Jing Xiao, Qin Chen, Sheng-Di	2012		Asia	Yes (as target group of study is a racial/ethnic group	Yes (as target group of study is a racial/ethnic group)	Target group of study is a racial/ethnic group	Chinese	Cases: 249M, 200F and Controls: 245M, 207F	Yes (as target group of study is a racial/ethnic group	Yes and target group of study is a racial/ethnic group	NA
219	Late-life hemoglobin and the incidence of Parkinson's disease.	Abbott, Robert D Ross, G Webster Tanner, Caroline M Andersen, Julie K Masaki, Kamal H Rodriguez, Beatriz L White, Lon R Petrovitch, Helen	2012	Hemoglobin; iron; Parkinson’s disease; epidemiology	North America	No	Yes (as descriptives of the sample)	Described and combined with the total sample	Japaenese ancestry	all men(n=3507)	No	NA	No
220	Clinical features of Parkinson disease when onset of diabetes came first: A case-control study.	Cereda, E Barichella, M Cassani, E Caccialanza, R Pezzoli, G	2012		Unknown	No	No	NA	NA	Cases: 58(65.1%)M and Controls: 58(65.1%)M	No	NA	No
221	Caffeine and risk of Parkinson's disease in a large cohort of men and women.	Palacios, Natalia Gao, Xiang McCullough, Marjorie L Schwarzschild, Michael A Shah, Roma Gapstur, Susan Ascherio, Alberto	2012	Parkinson; epidemiology; coffee; caffeine; tea	North America	No	No	NA	NA	Population 48,532M and 63,590F, Cases: 197M and 120F	No	NA	No
222	CNS infections, sepsis and risk of Parkinson's disease.	Fang, Fang Wirdefeldt, Karin Jacks, Andreas Kamel, Freya Ye, Weimin Chen, Honglei	2012	Parkinson’s disease, central nervous system infections, sepsis, registers	Europe	No	No	NA	NA	Cases: 10799(57.9%)M and Controls: 53995(57.9%)M	No	NA	No
223	Lack of genetic association of the UCHL1 gene with Alzheimer's disease and Parkinson's disease with dementia.	Shibata, Nobuto Motoi, Yumiko Tomiyama, Hiroyuki Ohnuma, Tohru Kuerban, Bolati Tomson, Katrin Komatsu, Miwa Hattori, Nobutaka Arai, Heii	2012		Asia	No	No	NA	NA	AD group: 74M, 100F and PD group: 15M, 24F and Controls: 63M, 74F	No	NA	No
224	GSK3$β$ reduces risk of sporadic Parkinson's disease in ethnic Chinese.	Zhao, Dong-Mei Li, Nan-Nan Zhang, Jin-Hong Chang, Xue-Li Mao, Xue-Ye Liao, Qiao Tan, Eng-King Peng, Rong	2012	Parkinson’s disease; SNP; GSK3b	Asia	Yes (as target group of study is a racial/ethnic group	Yes (as target group of study is a racial/ethnic group)	Target group of study is a racial/ethnic group	Han Chinese	Control: 253M, 266F Cases: 435M, 326F	Yes (as target group of study is a racial/ethnic group	Yes and target group of study is a racial/ethnic group	NA
225	A search for SNCA 3' UTR variants identified SNP rs356165 as a determinant of disease risk and onset age in Parkinson's disease.	Cardo, Lucía F Coto, Eliecer de Mena, Lorena Ribacoba, René Lorenzo-Betancor, Oswaldo Pastor, Pau Samaranch, Lluis Mata, Ignacio F Díaz, Marta Moris, Germán Menéndez, Manuel Corao, Ana I Alvarez, Victoria	2012	Parkinson’s disease . Alpha-synuclein . DNA polymorphisms. Genetic risk	Europe	No	Yes (as descriptives of the sample)	Described and combined with the total sample	Caucasian	Austrias cohort: Cases(n=752): 47%M, Controls(n=480):55%M. Navarre cohort: cases(n=417):62%M, Controls(n=292):25%M	No	NA	No
226	Metformin-inclusive sulfonylurea therapy reduces the risk of Parkinson's disease occurring with Type 2 diabetes in a Taiwanese population cohort.	Wahlqvist, Mark L Lee, Meei-Shyuan Hsu, Chih-Cheng Chuang, Shao-Yuan Lee, Jiunn-Tay Tsai, Hsin-Ni	2012	MetforminSulfonylureasDiabetesParkinson’s disease	Asia	No	No	NA	NA	Population(n=6420): 51.3%F	No	NA	No
227	Birth cohort effects in neurological diseases: amyotrophic lateral sclerosis, Parkinson's disease and multiple sclerosis.	Ajdacic-Gross, Vladeta Schmid, Margareta Tschopp, Alois Gutzwiller, Felix	2012		Europe	No	No	NA	NA	Not available	No	NA	No
228	Genetic analysis of LRRK2 A419V variant in ethnic Chinese.	Li, Nan-Nan Tan, Eng-King Chang, Xue-Li Mao, Xue-Ye Zhang, Jin-Hong Zhao, Dong-Mei Liao, Qiao Peng, Rong	2012		Asia	Yes (as target group of study is a racial/ethnic group	Yes (as target group of study is a racial/ethnic group)	Target group of study is a racial/ethnic group	Han Chinese	Control: 333M, 252F. Cases: 412M, 317F	Yes (as target group of study is a racial/ethnic group	Yes and target group of study is a racial/ethnic group	NA		"In conclusion, we provide additional evidence to suggest that LRRK2 A419V may be a genetic susceptibility factor for PD in our ethnic Han Chinese population"
229	A large study reveals no association between APOE and Parkinson's disease.	Federoff, Monica Jimenez-Rolando, Belen Nalls, Michael A Singleton, Andrew B	2012	Parkinson’s disease; genetics; APOE	North America	No	Yes (as descriptives of the sample)	Described and combined with the total sample	European ancestry	Cases: 1527M, 885F and Controls: 385M, 668F	Yes (as factor)	Yes	NA		Limitation is ethnic variability
230	Markers of inflammation in prevalent and incident Parkinson's disease in the Cardiovascular Health Study.	Ton, Thanh G N Jain, Samay Biggs, Mary L Thacker, Evan L Strotmeyer, Elsa S Boudreau, Robert Newman, Anne B Longstreth, W T Jr Checkoway, Harvey	2012	albumins; C-reactive protein; inflammation; interleukin-6; odds ratio; Parkinson’s disease; tumor necrosis factor-α	North America	Yes (as factor)	Yes (as a control variable/covariate the data analyses)	Described and combined with the total sample	687 African Americans added to study , African American(n): prevalent PD at baseline: PD: 3(5%) and no PD: 921(15.8%) Incident PD during follow up: PD: 24(15.6%) and no PD: 897(15.8%)	prevalent PD at baseline: PD: 37M and no PD: 2458F Incident PD during follow up: PD: 84M and no PD: 2374F	Yes (as factor)	No	NA
231	Association studies of MMP-9 in Parkinson's disease and amyotrophic lateral sclerosis.	He, Xianghua Zhang, Lifang Yao, Xiaoli Hu, Jing Yu, Lihua Jia, Hua An, Ran Liu, Zhuolin Xu, Yanming	2013		Asia	Yes (as target group of study is a racial/ethnic group	Yes (as target group of study is a racial/ethnic group)	Target group of study is a racial/ethnic group	ethnic Han Chinese	cases: 193M, 158F and controls: 203M, 148F	Yes (as target group of study is a racial/ethnic group	Yes and target group of study is a racial/ethnic group	NA		Generalizability limited
232	Head injuries and Parkinson's disease in a case-control study.	Harris, M Anne Shen, Hui Marion, Stephen A Tsui, Joseph K C Teschke, Kay	2013		North America	No	No	NA	NA	Cases: 266(66%)M and 137(34%)F and Controls: 204(50.4%)M and 201(49.6%)F	No	NA	No
233	Dietary and lifestyle variables in relation to incidence of Parkinson's disease in Greece.	Kyrozis, Andreas Ghika, Apostolia Stathopoulos, Panayiotis Vassilopoulos, Dimitris Trichopoulos, Dimitrios Trichopoulou, Antonia	2013		Europe	No	No	NA	NA	Population: 11,954(41.8%)M, 16,618(58.2%)F	No	NA	No
234	Evaluation of progression markers in the premotor phase of Parkinson's disease: the progression markers in the premotor phase study.	Liepelt-Scarfone, Inga Gauss, Katharina Maetzler, Walter Müller, Katharina Bormann, Christian Fruhmann Berger, Monika Timmers, Maarten Streffer, Johannes Berg, Daniela	2013		Europe	No	No	NA	NA	All controls: 18(43.9%)M, High risk PD subjects: 29(72.5%)M, PD cases: 9(56.3%)M	No	NA	No
235	Alzheimer's disease and Parkinson's disease genome-wide association study top hits and risk of Parkinson's disease in Korean population.	Chung, Sun Ju Jung, Yusun Hong, Myunghee Kim, Mi Jung You, Sooyeoun Kim, Young Jin Kim, Juyeon Song, Kyuyoung	2013	Parkinson’s diseaseAlzheimer’s diseaseSingle nucleotide polymorphismGenetic associationSNCA	Asia	Yes (as target group of study is a racial/ethnic group	Yes (as target group of study is a racial/ethnic group)	Target group of study is a racial/ethnic group	all ethnic Korean	PD Cases: 457(44.1%)M and 579(55.9%)F, Controls: 592(49%)M and 616(51%)F	Yes (as target group of study is a racial/ethnic group	Yes and target group of study is a racial/ethnic group	NA		limited GWAS on AD beyond individuals of Caucasian/white ethnicity"
236	STX6 rs1411478 is not associated with increased risk of Parkinson's disease.	Trinh, Joanne Vilariño-Güell, Carles Donald, Alan Shah, Brinda Yu, Irene Szu-Tu, Chelsea Aasly, Jan O Wu, Ruey-Meei Hentati, Faycal Rajput, Ali H Rajput, Alex Farrer, Matthew J	2013	Syntaxin 6STX6Parkinson’s diseaseProgressive supranuclear palsy	Other	Yes (as factor)	Yes (as a control variable/covariate the data analyses)	NA	Ethnically matched controls from Canada, Norway, Taiwan, Tunisa	Cases(n=1503): F:M= 1:1.21, Controls(n=1350): F:M= 1:0.88	No	NA	No
237	TOMM40 and APOE common genetic variants are not Parkinson's disease risk factors.	Peplonska, Beata Safranow, Krzysztof Gaweda-Walerych, Katarzyna Maruszak, Aleksandra Czyzewski, Krzysztof Rudzinska, Monika Barcikowska, Maria Zekanowski, Cezary	2013	Parkinson’s diseaseTOMM40geneAPOEgeneassociation study	Europe	No	Yes (as descriptives of the sample)	Described and combined with the total sample	All Caucasians from the Polish population	cases(n=407): 45.2%F and controls(n=305): 72%F	No	NA	No		The observed APOE allele frequencies were in agreement with previous reports from the Caucasian population
238	Ayurvedic constitution (prakruti) identifies risk factor of developing Parkinson's disease.	Manyam, Bala V Kumar, Abhimanyu	2013		North America	No	No	NA	NA	PD cases: 42M, 33F and Controls: 23M,50F	No	NA	No
239	Alcohol Consumption, Types of Alcohol, and Parkinson's Disease.	Liu, Rui Guo, Xuguang Park, Yikyung Wang, Jian Huang, Xuemei Hollenbeck, Albert Blair, Aaron Chen, Honglei	2013		North America	No	Yes (as a control variable/covariate the data analyses)	All ethnoracial groups other than White were considered together	Non- Hispanic White and Other Ethnicity breakdown by alcohol consumption, None: 89.2%W, 9.4%O, 1.5% missing and <1: 92.8%W, 6.3%O, 1.0%O and 1-1.9: 95.5%W, 3.7%O, 0.8%M and 2-2.9: 95.8%W, 3.5%O, 0.7%M and >3: 95.3%W, 3.9%O, 0.7%M	Participants: 180,235 M and 126,660 F	Yes (as factor)	No	NA
240	A cohort study on diet and the risk of Parkinson's disease: the role of food groups and diet quality.	Sääksjärvi, K Knekt, P Lundqvist, A Männistö, S Heliövaara, M Rissanen, H Järvinen, R	2013	Parkinson’s disease: Cohort studies: Diet: Relative risk	Europe	No	No	NA	NA	PD cases(n=85): 52.6%M and Controls(n=4439): 52.8%M	No	NA	No
241	Alcohol use disorders and risk of Parkinson’s disease: findings from a Swedish national cohort study 1972-2008.	Eriksson, Anna-Karin Löfving, Sofia Callaghan, Russell C Allebeck, Peter	2013	Alcohol, Parkinson’s disease, Cohort, Longitudinal, Epidemiology, Register	Europe	No	No	NA	NA	Alcohol use disorders: 73,794F and 202,733M, Appendicitis: 149,223F and 177,178M	No	NA	No
242	Risk factors for Parkinson's disease may differ in men and women: an exploratory study.	Savica, Rodolfo Grossardt, Brandon R Bower, James H Ahlskog, J Eric Rocca, Walter A	2013		North America	No	Yes (as descriptives of the sample)	Described and combined with the total sample	Mostly Caucasian and European descent (96% white)	192 case-control pairs . Cases: 61.7%M and 38.3%F with sex matched controls	No	NA	No		Results limited and not generalizable because population mostly Caucasian
243	Exposure to estrogen and women's risk for Parkinson's disease: a prospective cohort study in Denmark.	Rugbjerg, Kathrine Christensen, Jane Tjønneland, Anne Olsen, Jørgen H	2013	Exposure to estrogen and women's risk for Parkinson's disease: a prospective cohort study in Denmark.	Europe	No	No	NA	NA	All women (n=27,466)	No	NA	No
244	Analysis of EIF4G1 in Parkinson's disease among Asians.	Zhao, Yi Ho, Patrick Prakash, Kumar-M Foo, Jia-Nee Liu, Jian-Jun Au, Wing-Lok Tan, Louis C Tan, Eng-King	2013	Parkinson’s diseaseGene	Asia	Yes (as target group of study is a racial/ethnic group	Yes (as target group of study is a racial/ethnic group)	Target group of study is a racial/ethnic group	96 PD: 80 % Chinese 20% Asian mixed races. 1330 Chinese ( 791 cases and 539 controls)	PD cases: group 1:(n=96): 60%M, group2(n=791): 57.5%M. Controls(for group 2)(n=539): 56.6%M	Yes (as target group of study is a racial/ethnic group	Yes and target group of study is a racial/ethnic group	NA		Compared Asian cohort results to cauasian popualtion results
245	Parkinson disease is not associated with C9ORF72 repeat expansions.	Harms, Matthew B Neumann, Drexel Benitez, Bruno A Cooper, Breanna Carrell, David Racette, Brad A Perlmutter, Joel S Goate, Alison Cruchaga, Carlos	2013		North America	No	Yes (as descriptives of the sample)	Described and combined with the total sample	Majority Caucasian: 99.8% cases and 91.7% controls	PD cases(n=478): 62.1%M and Controls(n=662): 37.3%M	No	NA	No
246	Mutational analysis of TARDBP in Parkinson's disease.	van Blitterswijk, Marka van Es, Michael A Verbaan, Dagmar van Hilten, Jacobus J Scheffer, Hans van de Warrenburg, Bart P Veldink, Jan H van den Berg, Leonard H	2013	Parkinson’s diseaseAmyotrophic lateral sclerosisTARDBPGeneticsMutation	Europe	No	No	NA	NA	PD cases: 280M and 149F	No	NA	No
247	Preceding pain symptoms and Parkinson's disease: a nationwide population-based cohort study.	Lin, C-H Wu, R-M Chang, H-Y Chiang, Y-T Lin, H-H	2013	buprofen, non-steroidalanti-inﬂammatory drugs,pain, Parkinson’s diseas	Asia	No	No	NA	NA	Population: 16, 634F and 16, 753M	No	NA	No
248	Association of P2X7 receptor gene polymorphisms with sporadic Parkinson's disease in a Han Chinese population.	Liu, Hongxin Han, Xun Li, Yongsheng Zou, Haiqiang Xie, Anmu	2013	P2X7 receptorParkinson’s disease (PD)Single nucleotide polymorphisms (SNPs)	Asia	Yes (as target group of study is a racial/ethnic group	Yes (as target group of study is a racial/ethnic group)	Target group of study is a racial/ethnic group	Northern Han Chinese	PD cases: 182M and 103F, Helathy control: 160M and 125F	Yes (as target group of study is a racial/ethnic group	Yes and target group of study is a racial/ethnic group	NA
249	The stressful life events and Parkinson's disease: a case-control study.	Vlajinac, Hristina Sipetic, Sandra Marinkovic, Jelena Ratkov, Isidora Maksimovic, Jadranka Dzoljic, Eleonora Kostic, Vladimir	2013	case–control study; Parkinson’s disease; stres	Europe	No	No	NA	NA	Cases: 63M, 47F and Controls: 126M, 94F	No	NA	No
250	Infections as a risk factor for Parkinson's disease: a case-control study.	Vlajinac, Hristina Dzoljic, Eleonora Maksimovic, Jadranka Marinkovic, Jelena Sipetic, Sandra Kostic, Vladimir	2013	Parkinson’s disease, case–control study, infectious diseases	Europe	No	No	NA	NA	Cases: 63M, 47F and Controls: 126M, 94F (2 age matched control for each case)	No	NA	No
251	The association between Parkinson's disease and anti-epilepsy drug carbamazepine: a case-control study using the UK General Practice Research Database.	Skow, Aine Douglas, Ian Smeeth, Liam	2013	autophagy, carbamazepine, epilepsy, Parkinson’s disease	Europe	No	No	NA	NA	Cases: 4940M, 3609F and Controls: 24 292M, 17 868F	No	NA	No
252	Plasma apolipoprotein A1 as a biomarker for Parkinson disease.	Qiang, Judy K Wong, Yvette C Siderowf, Andrew Hurtig, Howard I Xie, Sharon X Lee, Virginia M-Y Trojanowski, John Q Yearout, Dora B Leverenz, James Montine, Thomas J Stern, Matt Mendick, Susan Jennings, Danna Zabetian, Cyrus Marek, Ken Chen-Plotkin, Alice S	2013		North America	No	No	NA	NA	Discovery cohort: 110M, 22F and Repliaction cohort: 119M, 68F	No	NA	No
253	Combined dementia-risk biomarkers in Parkinson's disease: a prospective longitudinal study.	Compta, Yaroslau Pereira, Joana B Ríos, Jose Ibarretxe-Bilbao, Naroa Junqué, Carme Bargalló, Núria Cámara, Ana Buongiorno, Mariateresa Fernández, Manel Pont-Sunyer, Claustre Martí, Maria J	2013		Europe	No	No	NA	NA	All participants(n=27): 8(30%)F	No	NA	No
254	Risk of Parkinson disease after depression: a nationwide population-based study.	Shen, Cheng-Che Tsai, Shih-Jen Perng, Chin-Lin Kuo, Benjamin Ing-Tiau Yang, Albert C	2013		Asia	Yes (as target group of study is a racial/ethnic group	Yes (as target group of study is a racial/ethnic group)	Target group of study is a racial/ethnic group	From Taiwan	62% Female for both cases and controls ( 4636 cases and 18544 controls)	Yes (as target group of study is a racial/ethnic group	Yes and target group of study is a racial/ethnic group	NA		Differences between taiwan and wetern popualtions disscussed as potentially due to ethnic differences
255	Time trends in incidence of Parkinson's disease diagnosis in UK primary care.	Horsfall, Laura Petersen, Irene Walters, Kate Schrag, Anette	2013	Parkinson disease Diagnosis Epidemiology Incidence study Time trends Databases Cohort	Europe	No	No	NA	NA	breakdown by n or % not specified but incidence of PD reported by sex	No	NA	Yes		Omitted because data not available, but ethnicnty could confound
256	Non-genetic factors associated with the risk of Parkinson's disease in Iranian patients.	Hosseini Tabatabaei, N Babakhani, B Hosseini Tabatabaei, A Vahabi, Z Soltanzadeh, A	2013	: case-control study, Parkinson’s disease, protective factors, risk factors	Asia	No	No	NA	NA	Cases: 51M, 24F and Controls: 51M, 24F	No	NA	No		First study to assess in an Iranian popualtion
257	Increased risk of Parkinson disease following a diagnosis of neovascular age-related macular degeneration: a retrospective cohort study.	Chung, Shiu-Dong Ho, Jau-Der Hu, Chao-Chien Lin, Herng-Ching Sheu, Jau-Jiuan	2014		Asia	Yes (as target group of study is a racial/ethnic group	Yes (as target group of study is a racial/ethnic group)	Target group of study is a racial/ethnic group	Taiwanese - ethnic Chinese	Not specfied (sex breakdown not given by n/%, mean ages given for female and males subjects)	Yes (as target group of study is a racial/ethnic group	Yes and target group of study is a racial/ethnic group	NA
258	Occupational complexity and risk of Parkinson's disease.	Valdés, Elise G Andel, Ross Sieurin, Johanna Feldman, Adina L Edwards, Jerri D Långström, Niklas Gatz, Margaret Wirdefeldt, Karin	2014		Europe	No	No	NA	NA	Controls(n=28,345): 46.36%F and Cases(n=433): 39.49%F	No	NA	No
259	Dietary fat intake, pesticide use, and Parkinson's disease.	Kamel, Freya Goldman, Samuel M Umbach, David M Chen, Honglei Richardson, Gina Barber, Marie Richards Meng, Cheryl Marras, Connie Korell, Monica Kasten, Meike Hoppin, Jane A Comyns, Kathleen Chade, Anabel Blair, Aaron Bhudhikanok, Grace S Webster Ross, G William Langston, J Sandler, Dale P Tanner, Caroline M	2014	Parkinson’s disease; dietary fat; polyunsaturated fatty acids; pesticides	North America	No	No	NA	NA	Cases: 67M, 22F and Controls: 246M, 90F	No	NA	No
260	Increased risk of Parkinson's disease in patients with end-stage renal disease: a retrospective cohort study.	Wang, I-Kuan Lin, Cheng-Li Wu, Yi-Ying Chou, Che-Yi Lin, Shih-Yi Liu, Jiung-Hsiun Yen, Tzung-Hai Huang, Chiu-Ching Sung, Fung-Chang	2014		Asia	No	No	NA	NA	Controls: 15,612(46.8%)F and 17,770(53.2%)M. Cases: 3,893(46.8%)F and 4,432(53.2%)M	No	NA	No
261	Gene-Gene and Gene-Environment Interaction on the Risk of Parkinson’s Disease	Neeraj Kumar Singh, Basu Dev Banerjee, Kiran Bala, Mitrabasu Chhillar, Neelam Chhillar	2014	β-HCH, CYP2D6 gene, dieldrin, GxE, GSTP1 gene, neurodegenerative disease, serum copper.	Asia	No	No	NA	NA	Controls(n=100): 61M, 39F and PD cases(n=70): 38M, 32F	No	NA	No
262	Zolpidem and the risk of Parkinson's disease: a nationwide population-based study.	Yang, Yu-Wan Hsieh, Teng-Fu Yu, Chia-Hui Huang, Yung-Sung Lee, Ching-Chih Tsai, Tsung-Huang	2014	InsomniaParkinson's diseaseRiskSleep disturbanceZolpidem	Asia	No	No	NA	NA	Controls: 37 460F, 22 088M and Cases: 25 772F, 16 399M	No	NA	No
263	Psychiatric diseases predated the occurrence of Parkinson disease: a retrospective cohort study.	Lin, Hsiu-Li Lin, Herng-Ching Chen, Yi-Hua	2014	DepressionAnxietyBipolar disorderSchizophreniaParkinson diseas	Asia	Yes (as target group of study is a racial/ethnic group	Yes (as target group of study is a racial/ethnic group)	Target group of study is a racial/ethnic group	Asian population (Tawian)	Cases: 45,303M and 28,294F. Controls: 135,909M and 84,882F	Yes (as target group of study is a racial/ethnic group	No and target group of study is a racial/ethnic group	NA
264	Restless legs syndrome: an early clinical feature of Parkinson disease in men.	Wong, Janice C Li, Yanping Schwarzschild, Michael A Ascherio, Alberto Gao, Xiang	2014		North America	No	No	NA	NA	all men (n=22,999)	No	NA	No
265	Multiple sclerosis and risk of Parkinson's disease: a Danish nationwide cohort study.	Nielsen, N M Pasternak, B Stenager, E Koch-Henriksen, N Frisch, M	2014	demyelinating diseases,multiple sclerosis,neurological disorders,Parkinson’s disease	Europe	No	No	NA	NA	cases: 14F, 12M	No	NA	No
266	The incidence of Parkinson's disease in the North-East of England.	Duncan, Gordon William Khoo, Tien Kheng Coleman, Shirley Y Brayne, Carol Yarnall, Alison Jane O'Brien, John Tiernan Barker, Roger A Burn, David J	2014	: Parkinson’s disease, incidence, parkinsonism, older people	Europe	No	No	NA	NA	Population: 246 045M, 242 531F. Cases: 87(56.1%)M	No	NA	No
267	Risk of Parkinson's disease following severe constipation: a nationwide population-based cohort study.	Lin, Chin-Hsien Lin, Jou-Wei Liu, Ying-Chun Chang, Chia-Hsuin Wu, Ruey-Meei	2014	constipationParkinson's diseasePopulation studyNon-motor symptomsPre-motor symptoms	Asia	No	No	NA	NA	Participants: No PD(n=548,988): 47.27%M and PD(n=2336): 49.91%M	No	NA	No
268	Particulate matter and risk of Parkinson disease in a large prospective study of women.	Palacios, Natalia Fitzgerald, Kathryn C Hart, Jaime E Weisskopf, Marc G Schwarzschild, Michael A Ascherio, Alberto Laden, Francine	2014	Epidemiology, Cohort studies, Incidence studies, Parkinson disease/Parkinsonism	North America	No	No	NA	NA	all women (n= 115, 620)	No	NA	No
269	Lifetime exposure to estrogens and Parkinson's disease in California teachers.	Gatto, N M Deapen, D Stoyanoff, S Pinder, R Narayan, S Bordelon, Y Ritz, B	2014		North America	Yes (as factor)	Yes (as a control variable/covariate the data analyses)	All ethnoracial groups other than White were considered together	Cases: 214(93%) white and 14(6%) non-white and Controls: 3073(92%) white and 236(7%) non-white	All women(n=230 cases and n= 3349 controls)	Yes (as factor)	No	NA		The study population was predominantly white
270	Risk factors and prodromal markers and the development of Parkinson's disease.	Lerche, Stefanie Seppi, Klaus Behnke, Stefanie Liepelt-Scarfone, Inga Godau, Jana Mahlknecht, Philipp Gaenslen, Alexandra Brockmann, Kathrin Srulijes, Karin Huber, Heiko Wurster, Isabel Stockner, Heike Kiechl, Stefan Willeit, Johann Gasperi, Arno Fassbender, Klaus Poewe, Werner Berg, Daniela	2014		Europe	No	No	NA	NA	Controls (n=1260): 51.9%M, 48.1%F and PD( after 3 years, n=11): 63.6%M, 36.4%F and PD (after 5 years, n=10): 70%M, 30%F	No	NA	No
271	Genetic associations of Nrf2-encoding NFE2L2 variants with Parkinson's disease - a multicenter study.	von Otter, Malin Bergström, Petra Quattrone, Aldo De Marco, Elvira Valeria Annesi, Grazia Söderkvist, Peter Wettinger, Stephanie Bezzina Drozdzik, Marek Bialecka, Monika Nissbrandt, Hans Klein, Christine Nilsson, Michael Hammarsten, Ola Nilsson, Staffan Zetterberg, Henrik	2014	Parkinson s disease, PD, Nrf2, NFE2L2, Meta-analysis, Multicenter, SNP, Haplotype, Risk factor	Europe	No	Yes (as descriptives of the sample)	Described and combined with the total sample	Caucasian (all participants except for PD-link -from Geoparkinson study where no ethnic data was provided)	Sweden PD-Goth study : Cases: 94(57%)M, Controls: 70(36.8%)M. Italy study: Cases: 205(62.3%)M, Controls: 179(39.8%)M. Sweden PD-link: Cases: 121(62.1%)M, Controls: 187(49.3%)M. Malta: Cases: 63(62.4%)M, Controls: 197(62.9%)M. Poland: Cases: 117(60.9%)M, Controls: 117(60.9%)M. Germany: Cases: 33(58.9%)M, Controls: 34(44.7%)M	No	NA	No
272	BST1 rs11724635 interacts with environmental factors to increase the risk of Parkinson's disease in a Taiwanese population.	Chen, Meng-Ling Lin, Chin-Hsien Lee, Ming-Jen Wu, Ruey-Meei	2014	BST1rs11724635Well water useGeneeenvironment interactionParkinson’s diseaseTaiwanese	Asia	Yes (as target group of study is a racial/ethnic group	Yes (as target group of study is a racial/ethnic group)	Target group of study is a racial/ethnic group	Taiwanese	Cases:235(50.2%)M, 233(49.8%)F and Controls: 163(33.5%)M, 324(66.5%)F	Yes (as target group of study is a racial/ethnic group	Yes and target group of study is a racial/ethnic group	NA		described as an asian population
273	Reduced risk of Parkinson's disease associated with lower body mass index and heavy leisure-time physical activity.	Sääksjärvi, Katri Knekt, Paul Männistö, Satu Lyytinen, Jukka Jääskeläinen, Tuija Kanerva, Noora Heliövaara, Markku	2014	Parkinson’s disease Cohort studies Body mass index Physical activity Smoking Alcohol	Europe	No	No	NA	NA	cases(n=101): 44.6%M and Controls(n=6614): 47.6%M	No	NA	No
274	Irritable bowel syndrome correlates with increased risk of Parkinson's disease in Taiwan.	Lai, Shih-Wei Liao, Kuan-Fu Lin, Cheng-Li Sung, Fung-Chang	2014	Irritable bowel syndrome Non-motor Parkinson’s disease	Asia	No	No	NA	NA	Cases: 12,843F and 11,032M Controls: 51,372F and 44,128M	No	NA	No
275	Dietary fat intake and risk for Parkinson's disease.	Dong, Jing Beard, John D Umbach, David M Park, YikYung Huang, Xuemei Blair, Aaron Kamel, Freya Chen, Honglei	2014	Dietary fat intake; Parkinson’s disease; cohort study	North America	No	Yes (as a control variable/covariate the data analyses)	All ethnoracial groups other than White were considered together	Popualtion demographics by quintiles of total fat intake as % of energy. Q1: 55,001(91.5%)W and Q2: 55,677(92.6%)W and Q3: 55,741(92.7%)W and Q4: 55,890(92.9%)W and Q5: 56,098(93.3%)W	Popualtion demographics by quintiles of total fat intake as % of energy. Q1: 33,481(55.7%)M and Q2: 33,485(55.7%)M and Q3: 33,140(58.4%)M and Q4: 36,240(60.6%)M and Q5:35,765(59.5%)M	Yes (as factor)	Yes	NA	Not generalizable since mostly Non-Hispanic WHite
276	Low muscle strength in late adolescence and Parkinson disease later in life	Helena Gustafsson, MD Jan Aasly, PhD Stefan Stråhle, MD Anna Nordström, PhD Peter Nordström, PhD	2015		Europe	No	No	NA	Swedish	All male (n= 1,317,713)	No	NA	No
277	Extremely low-frequency magnetic field exposure, electrical shocks and risk of Parkinson’s disease van der Mark MVermeulen RNijssen P et al.	van der Mark M Vermeulen R Nijssen P Mulleners W Sas A van Laar T Kromhout H Huss A	2015	Parkinson's disease; Extremely low-frequency magnetic fields; Electrical shocks; Case-control study; Job-exposure matrix	Europe	No	No	NA	NA	PD cases: 281(63.3%)M and Controls: 557(63.6%)M	No	NA	No
278	Vagotomy and subsequent risk of Parkinson's disease	Elisabeth Svensson PhD Erzsébet Horváth‐Puhó PhD Reimar W. Thomsen PhD Jens Christian Djurhuus DMSc Lars Pedersen PhD Per Borghammer DMSc Henrik Toft Sørensen DMSc	2015		Europe	No	No	NA	NA	F = 49,448 and M= 88,972	No	NA	No
279	Occupational exposures and Parkinson’s disease mortality in a prospective Dutch cohort	Brouwer, Maartje Koeman, Tom van den Brandt, Piet A Kromhout, Hans Schouten, Leo J Peters, Susan Huss, Anke Vermeulen, Roel	2015		Europe	No	No	NA	NA	Population: 58 279M and 62 573	No	NA	Yes		Questionaiire only in Dutch, limited population of non-westerners in Netherlands. "No information on race/ ethnicity of the partcicipants collected in this study" but previous studies showed that only 3% of the populaltion in netherlands were of non- western ethnicity
280	Statins, plasma cholesterol and risk of Parkinson’s disease: a prospective study	Xuemei Huang, M.D., Ph.D.1, Alvaro Alonso, M.D., Ph.D.2, Xuguang Guo, Ph.D.3, David M. Umbach, Ph.D.4, Maya L. Lichtenstein, M.D.5, Christie M. Ballantyne, M.D.6, Richard B Mailman, Ph.D.7, Thomas H. Mosley, Ph.D.8, and Honglei Chen, M.D., Ph.D.9	2015	Cholesterol; Cohort Studies; Female; Humans; Hydroxymethylglutaryl-CoA Reductase Inhibitors; Logistic Models; Male; Middle Aged; Parkinson Disease; Risk Factors; United States; administration & dosage; blood; epidemiology	North America	No	Yes (as a control variable/covariate the data analyses)	Each ethnoracial group was analysed distinctly	Black/White. PD before 1998(n=42): 83.3%W, 16.7%B and PD after 1998(n=56): 85.7%W, 14.3%B and No PD(n=15,193): 73%W, 27%B	(On average across 3 study groups) Men = 58.7% / Women = 41.2%. PD before 1998(n=42): 69%M and PD after 1998(n=56): 62.5%M and No PD(n=15,193): 44.8%M	Yes (as factor)	No	NA
281	Heart rate variability and the risk of Parkinson’s disease: the Atherosclerosis Risk in Communities (ARIC) Study	Alvaro Alonso, MD, PhD1, Xuemei Huang, MD, P	2015	Atherosclerosis; Bradycardia; Cohort Studies; Female; Follow-Up Studies; Heart Rate; Humans; Male; Middle Aged; Parkinson Disease; Prospective Studies; Residence Characteristics; Risk Factors; diagnosis; epidemiology; physiology; physiopathology	North America	No	Yes (as a control variable/covariate the data analyses)	Each ethnoracial group was analysed distinctly	Participants(n=12,162): Black= %25.3 / White = %74.3	Participants(n=12,162): Men = %43.5 / Women= %56.5	Yes (as factor)	No	NA	Limited number of cases so they didn't perform stratified analysis by race
282	An exome study of Parkinson’s disease in Sardinia, a Mediterranean genetic isolate	Quadri, Marialuisa Yang, Xu Cossu, Giovanni Olgiati, Simone Saddi, Valeria M Breedveld, Guido J Ouyang, Limei Hu, Jingchu Xu, Na Graafland, Josja Ricchi, Valeria Murgia, Daniela Guedes, Leonor Correia Mariani, Claudio Marti, Maria J Tarantino, Patrizia Asselta, Rosanna Valldeoriola, Francesc Gagliardi, Monica Pezzoli, Gianni Ezquerra, Mario Quattrone, Aldo Ferreira, Joaquim Annesi, Grazia Goldwur…	2015	Case-Control Studies; DNA Mutational Analysis; Exome; Female; Gene Frequency; Genetic Association Studies; Genetic Predisposition to Disease; Humans; Italy; Male; Mutation; Parkinson Disease; Polymorphism; Single	Europe	Yes (as target group of study is a racial/ethnic group	Yes (as target group of study is a racial/ethnic group)	Target group of study is a racial/ethnic group	Sardinia ancestry - mentioned all 4 grandparents also from there	Discovery: 53M/47F / Case-Control: 309M/191F / Replication(Italy- milano, Italy- catanzaro, Spain-barcelona , Spain, Portugal): 2,867M/2,776F	Yes (as target group of study is a racial/ethnic group	Yes and target group of study is a racial/ethnic group	NA
283	Traumatic brain injury in later life increases risk for P arkinson disease	Gardner, Raquel C Burke, James F Nettiksimmons, Jasmine Goldman, Sam Tanner, Caroline M Yaffe, Kristine	2015	Aged; 80 and over; Brain Injuries; California; Female; Follow-Up Studies; Male; Middle Aged; Parkinson Disease; Proportional Hazards Models; Retrospective Studies;	North America	Yes (as factor)	Yes (as a control variable/covariate the data analyses)	Each ethnoracial group was analysed distinctly	White (n=110,355), African American (n=5893), Hispanic (n=21018), Asian(n=7481), Other/missing (n=21052)	F= 106,308 / M= 59, 491	Yes (as factor)	No	NA
284	Risk of Parkinson's disease following anxiety disorders: a nationwide population‐based cohort study	Lin, C-H Lin, J-W Liu, Y-C Chang, C-H Wu, R-M	2015	Aged; Anxiety Disorders; Female; Follow-Up Studies; Humans; Male; Middle Aged; Parkinson Disease; Risk Factors; Severity of Illness Index; Taiwan; epidemiology	Asia	No	No	NA	NA	Total(n= 174 776): M= 85,290(48.8%) and F= 89,486	No	NA	No
285	Risk of developing Parkinson's disease among patients with asthma: a nationwide longitudinal study	Cheng, C-M Wu, Y-H Tsai, S-J Bai, Y-M Hsu, J-W Huang, K-L Su, T-P Li, C-T Tsai, C-F Yang, A C Lin, W-C Pan, T-L Chang, W-H Chen, T-J Chen, M-H	2015	Aged; Asthma; Comorbidity; Cross-Sectional Studies; Female; Humans; Longitudinal Studies; Male; Middle Aged; Parkinson Disease; Proportional Hazards Models; Retrospective Studies; Risk Factors; epidemiology	Asia	No	No	NA	NA	Cases(n=10455): 4319(41.3%)M and Controls(n=41820): 17276(41.3%)M	No	NA	No
286	Relationship of age of onset and family history in Parkinson disease	Barrett, Matthew J Hac, Nicholas E Yan, Guofen Harrison, Madaline B Wooten, G Frederick	2015	Adult; Age Factors; Age of Onset; Family Health; Female; Humans; Male; Middle Aged; Parents; Parkinson Disease; Prevalence; Retrospective Studies; Risk Factors; Siblings; epidemiology; genetics	North America	No	No	NA	NA	Porbands(n=1114): 439(39.4%)F	No	NA	No
287	Related factors and prevalence of Parkinson’s disease among Uygur residents in Hetian, Xinjiang Uygur Autonomous Region	X.L. Yang1 *, Q. Luo1 *, H.X. Song2 , Y.L. Wang3 , Y.N. Yao3 and H. Xia1	2015	Aged; Aged; 80 and over; China; Cohort Studies; Female; Humans; Male; Middle Aged; Parkinson Disease; Prevalence; Prospective Studies; Risk Factors; Surveys and Questionnaires; epidemiology	Asia	Yes (as target group of study is a racial/ethnic group	Yes (as target group of study is a racial/ethnic group)	Target group of study is a racial/ethnic group	Uygur population	Population: 3034(51.15%)M and 2898(48.85%)F	Yes (as target group of study is a racial/ethnic group	No and target group of study is a racial/ethnic group	NA
288	Polygenic Risk of Parkinson Disease Is Correlated with Disease Age at Onset	Escott-Price, Valentina Nalls, Mike A Morris, Huw R Lubbe, Steven Brice, Alexis Gasser, Thomas Heutink, Peter Wood, Nicholas W Hardy, John Singleton, Andrew B Williams, Nigel M	2015	Age of Onset; Aged; Aged; 80 and over; Female; Genetic Predisposition to Disease; Humans; Male; Middle Aged; Multifactorial Inheritance; Parkinson Disease; Polymorphism; Single Nucleotide; Retrospective Studies; Risk Factors; diagnosis; epidemiology; genetics	Unknown	No	No	NA	NA	Not specfied	No	NA	No		population demographic data not provided
289	Quantification of Diabetes Comorbidity Risks across Life Using Nation-Wide Big Claims Data	Peter Klimek1 , Alexandra Kautzky-Willer2 , Anna Chmiel1 , Irmgard Schiller-Frühwirth3 , Stefan Thurner1,	2015		Europe	No	No	NA	NA	Participants: 1 064 952F and 797 306M	No	NA	No
290	Obstructive sleep apnea and risk of Parkinson's disease: a population-based cohort study.	Chen, Jin-Cherng Tsai, Tzung-Yi Li, Chung-Yi Hwang, Juen-Haur	2015	Aged; Cohort Studies; Comorbidity; Female; Humans; Incidence; Male; Middle Aged; Parkinson Disease; Risk; Risk Factors; Sleep Apnea; Obstructive; Sleep Initiation and Maintenance Disorders; Taiwan; diagnosis; epidemiology	Asia	No	Yes (as descriptives of the sample)	Described and combined with the total sample	Asian population (Tawian)	Control: 15,435 M, 7834F // OSA: 3891M + 1973F	No	NA	No
291	Haptoglobin phenotype modifies serum iron levels and the effect of smoking on Parkinson disease risk.	Costa-Mallen, Paola Zabetian, Cyrus P Agarwal, Pinky Hu, Shu-Ching Yearout, Dora Samii, Ali Leverenz, James B Roberts, John W Checkoway, Harvey	2015	Age Factors; Aged; Analysis of Variance; Female; Ferritins; Haptoglobins; Humans; Iron; Male; Middle Aged; Odds Ratio; Parkinson Disease; Phenotype; Risk Factors; Sex Factors; Smoking; blood; ethnology; genetics; metabolism	North America	Yes (as factor)	Yes (as an integral part of the data analyses)	Each ethnoracial group was analysed distinctly	White (314/88.70%), African American (12/3.39%), Hispanic (4/1.13%), Asian (8/ 2.26%), Native American(1/0.28%), Multiethnic(15/4.24%)	Idiopathic PD: 40F + 88M // Controls: 122F + 104M	Yes (as factor)	Yes	NA
292	Methamphetamine/amphetamine abuse and risk of Parkinson's disease in Utah: a population-based assessment.	Curtin, Karen Fleckenstein, Annette E Robison, Reid J Crookston, Michael J Smith, Ken R Hanson, Glen R	2015	Adult; Aged; Amphetamine-Related Disorders; Cocaine-Related Disorders; Comorbidity; Female; Humans; Male; Middle Aged; Parkinson Disease; Proportional Hazards Models; Retrospective Studies; Risk Factors; Utah; epidemiology	North America	No	Yes (as descriptives of the sample)	All ethnoracial groups other than White were considered together	Reported race: White, Not White, unreported Reported ethnicity: Not Hispanic(n=30889), Hispanic (n=3750), Unreported (n=6173)	18,606F and 22,206M (40812)	Yes (as factor)	Yes	NA		To calculate the ethnoracial population size, I used the "Reported ethnicity" and not he "Reported race" because I thought they might overlap. The authors didn't adjust for race/ethnicity because the categorized groups were 'sparse'
293	Inverse association between yerba mate consumption and idiopathic Parkinson's disease. A case-control study.	Gatto, Emilia Mabel Melcon, Carlos Parisi, Virginia L Bartoloni, Leonardo Gonzalez, Claudio D	2015	Aged; Alcohol Drinking; Analysis of Variance; Argentina; Case-Control Studies; Coffee; Female; Humans; Ilex paraguariensis; Male; Middle Aged; Parkinson Disease; Reproducibility of Results; Retrospective Studies; Risk Factors; Smoking; adverse effects; epidemiology; etiology; metabolism; prevention & control	South America	No	Yes (as descriptives of the sample)	Each ethnoracial group was analysed distinctly	Caucasian( 207 cases, 389 controls), American-Indian( 7 cases, 7 controls) , Other (1 case, 4 controls), Not Available (8 cases, 6 controls)	Case: 92F/131M -- Control: 236F/170M	Yes (as factor)	No	NA
294	Depression and subsequent risk of Parkinson disease: A nationwide cohort study.	Helena Gustafsson, MD, Anna Nordström, PhD, and Peter Nordström, PhD	2015	ase-Control Studies; Cohort Studies; Depressive Disorder; Female; Follow-Up Studies; Humans; Logistic Models; Male; Middle Aged; Multivariate Analysis; Odds Ratio; Parkinson Disease; Psychiatric Status Rating Scales; Recurrence; Risk Factors; Siblings; Sweden; Time Factors; epidemiology	Europe	No	No	NA	Swedish	Nested case-control cohort: Cases(n=140,688): 61.6% female, 38.4% male and Controls(n=421,718): 61.6% female, 38.4% male. Sibling cohort: 50.6% depressed female, 42.5% non-depressed female, 49.4% depressed male, 57.5% male non-depressed	No	NA	No
295	EIF4G1 is neither a strong nor a common risk factor for Parkinson's disease: evidence from large European cohorts.	Johanna Huttenlocher,1 Rejko Krüger,2,3,4 Philipp Capetian,5 Katja Lohmann,5 Kathrin Brockmann,2,3 Ilona Csoti,6 Christine Klein,5 Daniela Berg,2,3 Thomas Gasser,2,3 Michael Bonin,1 Olaf Riess,1 Peter Bauer1	2015	Base Sequence; Cohort Studies; Eukaryotic Initiation Factor-4G; Europe; Genes; Dominant; Haplotypes; Humans; Molecular Sequence Data; Mutation; Missense; Parkinson Disease; Risk Factors; Sequence Analysis; DNA; epidemiology; genetics	Europe	Yes (as target group of study is a racial/ethnic group	Yes (as target group of study is a racial/ethnic group)	Target group of study is a racial/ethnic group	European descent	German population: Lubeck(n=672): 41%F, Tubingen(n=1379): 41%F	Yes (as target group of study is a racial/ethnic group	Yes and target group of study is a racial/ethnic group	NA
296	Head injury and risk for Parkinson disease: results from a Danish case-control study.	Kenborg, Line Rugbjerg, Kathrine Lee, Pei-Chen Ravnskjær, Line Christensen, Jane Ritz, Beate Lassen, Christina F	2015	Adult; Aged; Aged; 80 and over; Case-Control Studies; Craniocerebral Trauma; Denmark; Female; Humans; Male; Middle Aged; Parkinson Disease; Risk Factors; complications; diagnosis; epidemiology; etiology	Europe	No	No	NA	NA	Patients(n=1705): 709(41.6%)F, 996(58.4%)M and Controls(n=1785): 733(41.1%)F, 1052(58.9%)M	No	NA	No
297	Inverse Association of Parkinson Disease With Systemic Lupus Erythematosus: A Nationwide Population-based Study.	Liu, Feng-Cheng Huang, Wen-Yen Lin, Te-Yu Shen, Chih-Hao Chou, Yu-Ching Lin, Cheng-Li Lin, Kuen-Tze Kao, Chia-Hung	2015	Adult; Aged; Aged; 80 and over; Databases; Factual; Female; Follow-Up Studies; Humans; Incidence; Lupus Erythematosus; Systemic; Male; Middle Aged; Parkinson Disease; Proportional Hazards Models; Risk Factors; Taiwan; complications; epidemiology; etiology	Asia	No	No	NA	N/A	SLE cohort(n=12,817): 88.1% female, 11.9% male ; Non-SLE cohort(n=51,268): 88.1% female and 11.9% male	No	NA	No
298	Physical activity and risk of Parkinson's disease in the Swedish National March Cohort.	Yang, Fei Trolle Lagerros, Ylva Bellocco, Rino Adami, Hans-Olov Fang, Fang Pedersen, Nancy L Wirdefeldt, Karin	2015	Age Factors; Aged; Cohort Studies; Female; Humans; Leisure Activities; Male; Middle Aged; Motor Activity; Parkinson Disease; Prospective Studies; Risk; Risk Factors; Surveys and Questionnaires; Sweden; epidemiology	Europe	No	No	NA	Swedish	27,863(64.3%) female ; 15,505(35.7%) male	No	NA	No
299	Mitochondrial targeting sequence variants of the CHCHD2 gene are a risk for Lewy body disorders.	Ogaki, Kotaro Koga, Shunsuke Heckman, Michael G Fiesel, Fabienne C Ando, Maya Labbé, Catherine Lorenzo-Betancor, Oswaldo Moussaud-Lamodière, Elisabeth L Soto-Ortolaza, Alexandra I Walton, Ronald L Strongosky, Audrey J Uitti, Ryan J McCarthy, Allan Lynch, Timothy Siuda, Joanna Opala, Grzegorz Rudzinska, Monika Krygowska-Wajs, Anna Barcikowska, Maria Czyzewski, Krzysztof Puschmann, Andreas Nishioka…	2015	Adolescent; Adult; Aged; Aged; 80 and over; Amino Acid Sequence; Female; Gene Targeting; Genetic Variation; Humans; Lewy Body Disease; Male; Middle Aged; Mitochondria; Mitochondrial Proteins; Molecular Sequence Data; Parkinson Disease; Risk Factors; Transcription Factors; Young Adult; diagnosis; epidemiology; genetics; methods	North America	Yes (as target group of study is a racial/ethnic group	Yes (as target group of study is a racial/ethnic group)	Target group of study is a racial/ethnic group	All partciapnts are non- hispanic caucasian (Irish and Polish and US)	US (PD: 878/63.4%, LBD: 363/59.7% and Control: 300/41.8% male) ; Irish (PD: 202/56.9% and Control: 134/36.7% male) ; Polish (PD: 230/58.4% and Control: 187/53.4% male)	Yes (as target group of study is a racial/ethnic group	Yes and target group of study is a racial/ethnic group	NA		Noted that a previously performed Japanese study found that specific polymorphisms were high in PD patients but this wasn't replicated in Caucasians --> noted that this coudl be due to ethnic-specific allele frequencies that are lower in Caucasians
300	Mutations in the glucocerebrosidase gene are responsible for Chinese patients with Parkinson's disease.	Yu, Zhe Wang, Ting Xu, Jun Wang, Wei Wang, Guifang Chen, Chao Zheng, Lili Pan, Li Gong, Dianrong Li, Xueli Qu, Huaiqian Li, Fang Zhang, Bin Le, Weidong Han, Fabin	2015	Amino Acid Sequence; Asian Continental Ancestry Group; Base Sequence; China; Cohort Studies; DNA Mutational Analysis; Female; Gene Frequency; Genetic Predisposition to Disease; Glucosylceramidase; Haplotypes; Humans; Male; Molecular Sequence Data; Mutation; Parkinson Disease; Polymorphism; Single Nucleotide; Risk Factors; Sequence Deletion; ethnology; genetics	Asia	Yes (as target group of study is a racial/ethnic group	Yes (as target group of study is a racial/ethnic group)	Target group of study is a racial/ethnic group	Chinese	184 cases ( M:F- 1.51) and 130 age and sex matched control s	Yes (as target group of study is a racial/ethnic group	Yes and target group of study is a racial/ethnic group	NA	Referenced significance of gene frequencies in comparison to other ethnic groups (ex. Jewish)
301	Parkinson's disease research in a prospective cohort in China.	Chen, Honglei Ding, Ding Wang, Jian Zhao, Qianhua Meng, Haijiao Li, Honglan Gao, Yu-Tang Shu, Xiao-Ou Tanner, Caroline M Hong, Zhen Yang, Gong	2015	Parkinson’s disease/Parkinsonism; risk factors in epidemiology; cohort studies	Asia	No	No	NA	NA	All women(n=71600)	No	NA	No
302	Occupational history of night shift work and Parkinson's disease in Denmark.	Schernhammer, Eva S Lassen, Christina F Kenborg, Line Ritz, Beate Olsen, Jørgen H Hansen, Johnni	2015	Adult; Aged; Case-Control Studies; Circadian Rhythm; Denmark; Educational Status; Family Health; Female; Humans; Interviews as Topic; Life Style; Logistic Models; Male; Medical Records; Middle Aged; Parkinson Disease; Residence Characteristics; Risk Factors; Time Factors; Work Schedule Tolerance; epidemiology; physiology	Other	No	No	NA	NA	PD(n= 1779): 59.3% male and Controls(n= 1852): 59.7% male	No	NA	No
303	An association between organophosphate pesticides exposure and Parkinsonism amongst people in an agricultural area in Ubon Ratchathani Province, Thailand.	Norkaew, Saowanee Lertmaharit, Somrat Wilaiwan, Wachiraporn Siriwong, Wattasit Pérez, Héctor Maldonado Robson, Mark G	2015	Agricultural Workers' Diseases; Cross-Sectional Studies; Environmental Pollutants; Female; Humans; Male; Middle Aged; Occupational Exposure; Organophosphate Poisoning; Organophosphorus Compounds; Parkinson Disease; Prevalence; Risk Factors; Thailand; adverse effects; chemically induced; epidemiology; etiology; toxicity	Asia	No	No	NA	NA	Participants: 34(37.8%)M and 56(62.2%) female	No	NA	No
304	Cardiovascular risk factors and the risk of Parkinson's disease.	Vikdahl, M Bäckman, L Johansson, I Forsgren, L Håglin, L	2015	Body Mass Index; Cardiovascular Diseases; Case-Control Studies; Cholesterol; Cohort Studies; Female; Humans; Hypercholesterolemia; Hypertension; Hypertriglyceridemia; Male; Middle Aged; Motor Activity; Overweight; Parkinson Disease; Prospective Studies; Risk Factors; Sex Factors; Smoking; Sweden; Triglycerides; Waist-Height Ratio; adverse effects; blood; epidemiology; etiology; physiopathology; p…	Europe	No	No	NA	NA	Cases:38F, 46M and Controls: 152F, 184M	No	NA	No
305	Familial aggregation of Parkinson's disease in the Faroe Islands.	Petersen, Maria Skaalum Bech, Sara Nosova, Ekaterina Aasly, Jan Farrer, Matthew J	2015	Adult; Aged; Aged; 80 and over; Cohort Studies; Denmark; Family Health; Female; Genetic Testing; Humans; Male; Middle Aged; Parkinson Disease; Residence Characteristics; Risk Factors; epidemiology; genetics	Europe	Yes (as target group of study is a racial/ethnic group	Yes (as target group of study is a racial/ethnic group)	Target group of study is a racial/ethnic group	Faroe Island residents (Caucasian)	Provided ratios: on average 1.3. Cases: 124M, 93F and Controls: 152M, 99F	Yes (as target group of study is a racial/ethnic group	Yes and target group of study is a racial/ethnic group	NA
306	Organophosphate Pesticide Exposures, Nitric Oxide Synthase Gene Variants, and Gene-Pesticide Interactions in a Case-Control Study of Parkinson's Disease, California (USA).	Paul, Kimberly C Sinsheimer, Janet S Rhodes, Shannon L Cockburn, Myles Bronstein, Jeff Ritz, Beate	2016	Aryldialkylphosphatase; California; Case-Control Studies; Environmental Exposure; Environmental Pollutants; Humans; Nitric Oxide Synthase; Nitric Oxide Synthase Type II; Organophosphorus Compounds; Parkinson Disease; Pesticides; Polymorphism; Single Nucleotide; Risk Factors; epidemiology; genetics; statistics & numerical data; toxicity	North America	No	Yes (as a control variable/covariate the data analyses)	Described and combined with the total sample	European ancestry: Cases(81%) and Controls(89%) and No European ancestry: Cases(19%) and Controls(11%)	Cases(n=357): 57% male ; Control (n=495): 49% male	Yes (as factor)	No	NA
307	Association Between Parkinson's Disease and Inflammatory Bowel Disease: a Nationwide Taiwanese Retrospective Cohort Study.	Lin, Jung-Chun Lin, Chin-Sheng Hsu, Chin-Wang Lin, Cheng-Li Kao, Chia-Hung	2016	Adult; Aged; Comorbidity; Female; Follow-Up Studies; Humans; Incidence; Inflammatory Bowel Diseases; Male; Middle Aged; Parkinson Disease; Prognosis; Retrospective Studies; Risk Factors; Taiwan; complications; epidemiology; etiology	Asia	No	No	NA	NA	IBD patients(n=8373): 53.2% female; Non-IBD patients(n=33,492): 53.2% female	No	NA	No
308	Traffic-related air pollution increased the risk of Parkinson's disease in Taiwan: A nationwide study.	Lee, Pei-Chen Liu, Li-Ling Sun, Yu Chen, Yu-An Liu, Chih-Ching Li, Chung-Yi Yu, Hwa-Lung Ritz, Beate	2016	Aged; Aged; 80 and over; Air Pollutants; Air Pollution; Bayes Theorem; Case-Control Studies; Environmental Exposure; Female; Humans; Male; Middle Aged; Parkinson Disease; Research Design; Risk Factors; Taiwan; Vehicle Emissions; adverse effects; analysis; epidemiology; etiology; toxicity	Asia	No	No	NA	Taiwanese	Cases(n=11,117): 48.7% female; Control(n=44,468): 48.7% female	No	NA	No
309	Time trends in the prevalence and incidence of Parkinson's disease in Taiwan: A nationwide, population-based study.	Liu, Weng-Ming Wu, Ruey-Meei Lin, Jou-Wei Liu, Ying-Chun Chang, Chia-Hsuin Lin, Chin-Hsien	2016	Databases; Factual; Female; Humans; Incidence; International Classification of Diseases; Longitudinal Studies; Male; Middle Aged; National Health Programs; Parkinson Disease; Prevalence; Regression Analysis; Retrospective Studies; Risk Factors; Sex Distribution; Taiwan; Time Factors; diagnosis; epidemiology	Asia	Yes (as target group of study is a racial/ethnic group	Yes (as target group of study is a racial/ethnic group)	Target group of study is a racial/ethnic group	Taiwanese - Asian	NA	Yes (as target group of study is a racial/ethnic group	Yes and target group of study is a racial/ethnic group	NA	Described cultural differences that may contribute to why the results are the way they are in a Taiwanese popualtion
310	Gene-Environment Interaction in Parkinson's Disease: Coffee, ADORA2A, and CYP1A2.	Chuang, Yu-Hsuan Lill, Christina M Lee, Pei-Chen Hansen, Johnni Lassen, Christina F Bertram, Lars Greene, Naomi Sinsheimer, Janet S Ritz, Beate	2016	Aged; Coffee; Cytochrome P-450 CYP1A2; Denmark; Female; Gene-Environment Interaction; Humans; Male; Middle Aged; Parkinson Disease; Polymorphism; Single Nucleotide; Receptor; Adenosine A2A; Risk Factors; epidemiology; genetics	Europe	No	Yes (as descriptives of the sample)	Described and combined with the total sample	Non-hispanic Whites (educated guess by researchers as ethnic data wasn't available)	Cases(n=1556): 59.9%M and Controls(n=1606): 60.7%M	Yes (as factor)	No	NA	Database gave no ethnic information but they explained that some genetic variants may be explained by ethnicity.
311	Early-Life Factors and Risk of Parkinson's Disease: A Register-Based Cohort Study.	Liu, Bojing Chen, Honglei Fang, Fang Tillander, Annika Wirdefeldt, Karin	2016	Adult; Aged; Aged; 80 and over; Cohort Studies; Female; Humans; Male; Middle Aged; Multiple Birth Offspring; Parents; Parkinson Disease; Parturition; Registries; Risk Factors; Seasons; Siblings; epidemiology; statistics & numerical data	Europe	No	No	NA	NA	Control(n=3 545 612): 49.27% female ; Case(n=8779): 38.6%F	No	NA	No
312	Association between acute kidney injury and risk of Parkinson disease.	Lin, Shih-Yi Lin, Cheng-Li Hsu, Wu-Huei Yeh, Hung-Chieh Lin, Cheng-Chieh Lin, Chih-Hsueh Tseng, Chun-Hung	2016	Acute Kidney Injury; Aged; Aged; 80 and over; Alcohol-Related Disorders; Case-Control Studies; Comorbidity; Databases; Factual; Diabetes Mellitus; Female; Humans; Hyperlipidemias; Hypertension; Incidence; Male; Mental Disorders; Middle Aged; Obesity; Parkinson Disease; Proportional Hazards Models; Risk Factors; Stroke; Taiwan; epidemiology	Asia	No	No	NA	NA	AKI cohort(n=9380): 40.5% female ; Non-AKI cohort(n=37,484): 40.5% female	No	NA	No
313	Genetic Analysis of the ZNF512B, SLC41A1, and ALDH2 Polymorphisms in Parkinson's Disease in the Iranian Population.	Madadi, Faranak Khaniani, Mahmoud Shekari Shandiz, Ehsan Esmaili Ayromlou, Hormoz Najmi, Safa Emamalizadeh, Babak Taghavi, Shaghayegh Jamshidi, Javad Tafakhori, Abbas Shahidi, Gholam-Ali Darvish, Hossein	2016	Aged; Aldehyde Dehydrogenase; Mitochondrial; Anion Exchange Protein 1; Erythrocyte; Carrier Proteins; Female; Humans; Iran; Male; Middle Aged; Parkinson Disease; Polymorphism; Single Nucleotide; Risk Factors; epidemiology; genetics	Other	Yes (as target group of study is a racial/ethnic group	Yes (as target group of study is a racial/ethnic group)	Target group of study is a racial/ethnic group	ethnically Iranian	Case(n=490): 228(46.5%) female ; Control(n=490): 232(47.3%) female	Yes (as target group of study is a racial/ethnic group	Yes and target group of study is a racial/ethnic group	NA	Used research from other racial/ethnic groups to compare in discussion to contextualize findings
314	Personality traits and the risk for Parkinson disease: a prospective study.	Sieurin, Johanna Gustavsson, Petter Weibull, Caroline Elise Feldman, Adina Leiah Petzinger, Giselle Maria Gatz, Margaret Pedersen, Nancy Lee Wirdefeldt, Karin	2016	Adult; Aged; Anxiety Disorders; Cohort Studies; Female; Humans; Introversion; Psychological; Male; Middle Aged; Neuroticism; Parkinson Disease; Personality; Personality Assessment; Personality Inventory; Population Surveillance; Proportional Hazards Models; Prospective Studies; Registries; Risk Factors; Surveys and Questionnaires; Twins; epidemiology; etiology; methods; psychology; statistics & n…	Europe	No	No	NA	NA	Population(n= 29, 852): 52% female	No	NA	No
315	Prospective study of plasma urate and risk of Parkinson disease in men and women.	Gao, Xiang O'Reilly, Éilis J Schwarzschild, Michael A Ascherio, Alberto	2016	Adult; Aged; Case-Control Studies; Female; Humans; Logistic Models; Male; Middle Aged; Parkinson Disease; Prospective Studies; Risk Factors; Sex Characteristics; Uric Acid; blood; diagnosis	North America	No	Yes (as a control variable/covariate the data analyses)	All ethnoracial groups other than White were considered together	White and Other (mostly caucasian)	Control group: 446 male, 821 female ; Cohort: 202 male, 186 female	No	NA	No		All controls were matched to the cases basedon the cohort, race( white vs other), Generalizability is another concern for the current case-control study because the majority of participants were Caucasian
316	Prodromal Clinical Markers of Parkinson disease in Gaucher Disease Individuals.	Gatto, Emilia M Etcheverry, Jose Luis Sanguinetti, Ana Cesarini, Martin Fernandez Escobar, Nicolas Drelichman, Guillermo	2016	Adolescent; Adult; Biomarkers; Child; Enzyme Replacement Therapy; Female; Gaucher Disease; Glucosylceramidase; Heterozygote; Humans; Male; Middle Aged; Mutation; Parkinson Disease; Risk Factors; Young Adult; complications; diagnosis; drug therapy; genetics	Europe	No	Yes (as descriptives of the sample)	Each ethnoracial group was analysed distinctly	European and Amerindian. " European ancestry was reported in all patients but one with Amerindian ancestry"	11 men / 15 women	Yes (as factor)	No	NA
317	Migraine is related to an increased risk of Parkinson's disease: A population-based, propensity score-matched, longitudinal follow-up study.	Wang, Hsin-I Ho, Yu-Chun Huang, Ya-Ping Pan, Shin-Liang	2016	Adult; Aged; Aged; 80 and over; Female; Follow-Up Studies; Humans; Longitudinal Studies; Male; Middle Aged; Migraine Disorders; Parkinson Disease; Population Surveillance; Propensity Score; Risk Factors; Taiwan; diagnosis; epidemiology; methods	Asia	Yes (as target group of study is a racial/ethnic group	Yes (as target group of study is a racial/ethnic group)	Target group of study is a racial/ethnic group	Taiwanese	Migraine(n=41,019): 68.4% female ; Control(n=1,230,570): 68.4% female	Yes (as target group of study is a racial/ethnic group	Yes and target group of study is a racial/ethnic group	NA		Authors noted that their results may not be generalizeable to other ethnicities because it only studied Taiwanese subjects
318	Genetic risk of Parkinson's disease in the general population.	Darweesh, Sirwan K L Verlinden, Vincentius J A Adams, Hieab H H Uitterlinden, André G Hofman, Albert Stricker, Bruno H van Duijn, Cornelia M Koudstaal, Peter J Ikram, M Arfan	2016	Activities of Daily Living; Aged; Aged; 80 and over; Community Health Planning; Female; Genetic Variation; Humans; Longitudinal Studies; Male; Middle Aged; Netherlands; Parkinson Disease; Risk Factors; epidemiology; genetics; psychology	Europe	No	No	NA	NA	At risk for PD(n=7167): 57.7% female ; BADL exam(2997): 58.6% female	No	NA	Yes		Actually removed ethnic outliers (didn't specify what constituted and outlier) .
319	Association Between Tuberculosis and Parkinson Disease: A Nationwide, Population-Based Cohort Study.	Shen, Chih-Hao Chou, Chung-Hsing Liu, Feng-Cheng Lin, Te-Yu Huang, Wen-Yen Wang, Yu-Chiao Kao, Chia-Hung	2016	Aged; Comorbidity; Female; Humans; Male; Middle Aged; Parkinson Disease; Retrospective Studies; Risk Assessment; Risk Factors; Taiwan; Tuberculosis; epidemiology	Asia	No	No	NA	NA	TB Cohort(121,951): 28.1% female ; Non-TB cohort(487,800): 28.1% female	No	NA	No
320	Time Trends in the Incidence of Parkinson Disease.	Savica, Rodolfo Grossardt, Brandon R Bower, James H Ahlskog, J Eric Rocca, Walter A	2016	Aged; Aged; 80 and over; Cohort Studies; Female; Humans; Incidence; Male; Parkinson Disease; Reproducibility of Results; Sex Factors; Time Factors; United States; diagnosis; epidemiology	North America	No	No	NA	American	Parkinsonism cohort(906): 501M and 405F, PD cohort(n=464): 189F and 275M	No	NA	No
321	Hepatitis C virus infection as a risk factor for Parkinson disease: A nationwide cohort study.	Tsai, Hsin-Hsi Liou, Horng-Huei Muo, Chih-Hsin Lee, Cha-Ze Yen, Ruoh-Fang Kao, Chia-Hung	2016	Adult; Age Distribution; Aged; Causality; Cohort Studies; Comorbidity; Female; Hepatitis C; Humans; Incidence; Male; Middle Aged; Parkinson Disease; Reproducibility of Results; Risk Assessment; Sensitivity and Specificity; Sex Distribution; Taiwan; diagnosis; epidemiology	Asia	No	No	NA	NA	Hepatitis cohort(n=49,967): 43.5% female ; Control cohort(n=199,868): 43.5%F	No	NA	No
322	Socioeconomic status in relation to Parkinson's disease risk and mortality: A population-based prospective study.	Yang, Fei Johansson, Anna L V Pedersen, Nancy L Fang, Fang Gatz, Margaret Wirdefeldt, Karin	2016	Adult; Aged; Cause of Death; Female; Follow-Up Studies; Humans; Male; Middle Aged; Parkinson Disease; Proportional Hazards Models; Prospective Studies; Registries; Risk Factors; Socioeconomic Factors; Survival Analysis; Sweden; mortality	Europe	No	No	NA	Swedish	Partciapants(4,630, 828): Men: 48.5% and 51.5%F	No	NA	No
323	Traffic-Related Air Pollution and Parkinson's Disease in Denmark: A Case-Control Study.	Ritz, Beate Lee, Pei-Chen Hansen, Johnni Lassen, Christina Funch Ketzel, Matthias Sørensen, Mette Raaschou-Nielsen, Ole	2016	Aged; Air Pollutants; Case-Control Studies; Denmark; Environmental Exposure; Female; Housing; Humans; Incidence; Male; Middle Aged; Nitrogen Dioxide; Parkinson Disease; Risk Factors; Vehicle Emissions; adverse effects; epidemiology; etiology; toxicity	Europe	No	No	NA	Swedish	Case(n=1,696): 40.6% female ; Control(n=1,800): 40.7% female	No	NA	No
324	Associations between cancer and Parkinson's disease in U.S. elderly adults.	Freedman, D Michal Wu, Jincao Chen, Honglei Engels, Eric A Enewold, Lindsey R Freedman, Neal D Goedert, James J Kuncl, Ralph W Gail, Mitchell H Pfeiffer, Ruth M	2016	Age Distribution; Aged; Aged; 80 and over; Case-Control Studies; Databases; Factual; Female; Humans; Logistic Models; Male; Medicare; Neoplasms; Parkinson Disease; Proportional Hazards Models; Prospective Studies; Risk Factors; SEER Program; Sex Distribution; Smoking; United States; epidemiology	North America	No	Yes (as an integral part of the data analyses)	All ethnoracial groups other than White were considered together	Prospective cohort analysis: White (cancer patients: 86%, comparison group: 14%) and Non-white (cancer patients: 83.6%, comparison group: 16.4%) Case-control: white (cancer cases: 86.1%, controls: 13.9%) and Non-white (cancer cases: 84.3%, controls: 15.7%)	Prospective cohort analysis:Cancer patients(n=743779): 55.1%M and Comparison group(n=419432): 41.5%M Case- control: Cancer cases(n=836 947): 54.5%M and Controls(n=142 869): 54.8%M	Yes (as factor)	No	NA		Non-white: consisted of Black, asian, hispanic, Native-american Indinan and other/ unknown
325	Insulin-Like Growth Factor 1 (IGF-1) in Parkinson's Disease: Potential as Trait-, Progression- and Prediction Marker and Confounding Factors.	Bernhard, Felix P Heinzel, Sebastian Binder, Gerhard Weber, Karin Apel, Anja Roeben, Benjamin Deuschle, Christian Maechtel, Mirjam Heger, Tanja Nussbaum, Susanne Gasser, Thomas Maetzler, Walter Berg, Daniela	2016	Aged; Biomarkers; Body Mass Index; Disease Progression; Female; Founder Effect; Humans; Insulin-Like Growth Factor I; Longitudinal Studies; Male; Middle Aged; Parkinson Disease; Reproducibility of Results; Risk Factors; blood; diagnosis; metabolism	Europe	No	No	NA	NA	PD patients: 15F/ 22M and Healthy controls: 9F/13M	No	NA	No
326	Trends in the Incidence of Parkinson Disease in the General Population: The Rotterdam Study.	Darweesh, Sirwan K L Koudstaal, Peter J Stricker, Bruno H Hofman, Albert Ikram, M Arfan	2016	Age Distribution; Aged; Aged; 80 and over; Antipsychotic Agents; Coffee; Comorbidity; Dementia; Denmark; Female; Health Behavior; Humans; Hypolipidemic Agents; Incidence; Male; Middle Aged; Parkinson Disease; Parkinson Disease; Secondary; Parkinsonian Disorders; Prospective Studies; Regression Analysis; Risk Factors; Sex Distribution; Smoking; Stroke; administration & dosage; epidemiology	Europe	No	Yes (as descriptives of the sample)	Described and combined with the total sample	Almost exclusively white	NA	No	NA	No		population breakdown not given by sex but ajusted for sex within each age stratum " We did not observe statistically significant interaction with sex, and we could not investigate age-specific differences for men and women separately"
327	Association of DNMT3b gene variants with sporadic Parkinson's disease in a Chinese Han population.	Chen, Xiang Xiao, Yousheng Wei, Lei Wu, Yijuan Lu, Jianjun Guo, Wenyuan Huang, Shuxuan Zhou, Miaomiao Mo, Mingshu Li, Zhe Cen, Luan Li, Shaomin Yang, Chaohao Wu, Zhuohua Hu, Sophie Pei, Zhong Yang, XinLing Qu, Shaogang Xu, Pingyi	2017	Aged; Alleles; Asian Continental Ancestry Group; China; DNA (Cytosine-5-)-Methyltransferases; Female; Gene Frequency; Genetic Predisposition to Disease; Genotype; Haplotypes; Humans; Male; Middle Aged; Parkinson Disease; Polymorphism; Single Nucleotide; Risk Factors; Sex Factors; enzymology; ethnology; genetics	Asia	Yes (as target group of study is a racial/ethnic group	Yes (as target group of study is a racial/ethnic group)	Target group of study is a racial/ethnic group	Chinese Han	PD group(n=487): 210F / Control(n=485): 220F	Yes (as target group of study is a racial/ethnic group	Yes and target group of study is a racial/ethnic group	NA
328	Colonic diverticular disease: A new risk factor for Parkinson's disease?	Macerollo, Antonella Lu, Ming-Kuei Huang, Hui-Chun Chen, Hsuan-Ju Lin, Che-Chen Kao, Chia-Hung Tsai, Chon-Haw Chen, Jui-Cheng	2017	Adult; Age Distribution; Aged; Aged; 80 and over; Cohort Studies; Community Health Planning; Diverticulitis; Colonic; Female; Humans; Incidence; Male; Middle Aged; Parkinson Disease; Risk Factors; Taiwan; Young Adult; complications; epidemiology	Asia	No	No	NA	NA	Control(n=23367): 43.17% female ; Colonic disease(n=23367): 43.17% female	No	NA	No
329	Agricultural activities and the incidence of Parkinson's disease in the general French population.	Kab, Sofiane Spinosi, Johan Chaperon, Laura Dugravot, Aline Singh-Manoux, Archana Moisan, Frédéric Elbaz, Alexis	2017	Age Distribution; Aged; Agriculture; Agrochemicals; Female; France; Humans; Incidence; Male; Parkinson Disease; Pesticides; Risk Factors; Sex Distribution; epidemiology; statistics & numerical data	Europe	No	No	NA	NA	NA- demographic characteritics not available	No	NA	No
330	Risk of Parkinson disease after organophosphate or carbamate poisoning.	Chuang, C-S Su, H-L Lin, C-L Kao, C-H	2017	Adult; Aged; Carbamates; Cohort Studies; Databases; Factual; Female; Humans; Male; Middle Aged; Organophosphate Poisoning; Parkinson Disease; Retrospective Studies; Risk Factors; Taiwan; diagnosis; epidemiology; poisoning	Asia	No	Yes (as descriptives of the sample)	Described and combined with the total sample	Taiwanese	Poisoned group (n=9128): 29.8% female ; Control(n=36 466): 29.8% female	No	NA	No		Authors expalined how Taiwan's geography could explain the lack of variation in their data based on geographic location/ubanization. Explained previously publshed ethinic demographics of taiwan
331	Association Between Poor Cognitive Functioning and Risk of Incident Parkinsonism: The Rotterdam Study.	Darweesh, Sirwan K L Wolters, Frank J Postuma, Ronald B Stricker, Bruno H Hofman, Albert Koudstaal, Peter J Ikram, M Kamran Ikram, M Arfan	2017	Aged; Cognitive Dysfunction; Dementia; Female; Follow-Up Studies; Humans; Incidence; Male; Middle Aged; Netherlands; Neuropsychological Tests; Parkinson Disease; Parkinsonian Disorders; Prodromal Symptoms; Proportional Hazards Models; Prospective Studies; Risk Factors; epidemiology	Europe	No	No	NA	NA	Population(n=7386): 57.4% female	No	NA	No
332	Association of UV radiation with Parkinson disease incidence: A nationwide French ecologic study.	Kravietz, Adam Kab, Sofiane Wald, Lucien Dugravot, Aline Singh-Manoux, Archana Moisan, Frédéric Elbaz, Alexis	2017	Aged; Dietary Supplements; Female; France; Humans; Male; Middle Aged; Parkinson Disease; Risk Factors; Sunlight; Ultraviolet Rays; Vitamin D; administration & dosage; epidemiology	Europe	No	No	NA	NA	Data was adjusted for sex but sex data was unavailable	No	NA	No
333	Statin adherence and the risk of Parkinson's disease: A population-based cohort study.	Rozani, Violetta Giladi, Nir El-Ad, Baruch Gurevich, Tanya Tsamir, Judith Hemo, Beatriz Peretz, Chava	2017	Adult; Aged; Anticholesteremic Agents; Cholesterol; LDL; Cohort Studies; Female; Humans; Hydroxymethylglutaryl-CoA Reductase Inhibitors; Incidence; Male; Middle Aged; Parkinson Disease; Patient Compliance; Risk Factors; adverse effects; blood; epidemiology; therapeutic use	Asia	No	No	NA	NA	Cohort(n=232, 877): 49.3% men	No	NA	No		Authors mention that ethnicity was not available in the study
334	PREDICT-PD: An online approach to prospectively identify risk indicators of Parkinson's disease.	Noyce, Alastair J R'Bibo, Lea Peress, Luisa Bestwick, Jonathan P Adams-Carr, Kerala L Mencacci, Niccolo E Hawkes, Christopher H Masters, Joseph M Wood, Nicholas Hardy, John Giovannoni, Gavin Lees, Andrew J Schrag, Anette	2017	Aftercare; Aged; Algorithms; Female; Genetic Testing; Glucosylceramidase; Humans; Internet; Leucine-Rich Repeat Serine-Threonine Protein Kinas; Male; Middle Aged; Parkinson Disease; Prodromal Symptoms; Risk Assessment; Risk Factors; Saliva; diagnosis; genetics; methods	Europe	No	No	NA	NA	Female patients: 806(60.9%) at baseline	No	NA	No
335	The Prevalence of Parkinson Disease Among Patients With Hepatitis C Infection.	Golabi, Pegah Otgonsuren, Munkhzul Sayiner, Mehmet Arsalla, Aimal Gogoll, Trevor Younossi, Zobair M	2017	Aged; Aged; 80 and over; Chi-Square Distribution; Databases; Factual; Female; Hepatitis C; Humans; Male; Medicare; Parkinson Disease; Prevalence; Risk Factors; Time Factors; United States; diagnosis; epidemiology	North America	Yes (as factor)	Yes (as a control variable/covariate the data analyses)	All ethnoracial groups other than White were considered together	Total(n= 1236734):White(85.7%) and Non-white	Total(n= 1,236,734): 40.4% male	Yes (as factor)	No	NA
336	Head trauma and Parkinson's disease: results from an Italian case-control study.	Nicoletti, Alessandra Vasta, Rosario Mostile, Giovanni Nicoletti, Giuseppe Arabia, Gennarina Iliceto, Giovanni Lamberti, Paolo Marconi, Roberto Morgante, Letterio Barone, Paolo Quattrone, Aldo Zappia, Mario	2017	Age of Onset; Aged; Case-Control Studies; Craniocerebral Trauma; Female; Genetic Predisposition to Disease; Humans; Interviews as Topic; Italy; Male; Middle Aged; Multivariate Analysis; Neurologic Examination; Odds Ratio; Parkinson Disease; Retrospective Studies; Risk Factors; Severity of Illness Index; Surveys and Questionnaires; complications; epidemiology; genetics	Europe	No	No	NA	NA	Case(n=492): 40.6% female ; Control(n=459): 65.1% female	No	NA	No
337	Increased risk of Parkinson disease with diabetes mellitus in a population-based study.	Yang, Yu-Wan Hsieh, Teng-Fu Li, Chia-Ing Liu, Chiu-Shong Lin, Wen-Yuan Chiang, Jen-Huai Li, Tsai-Chung Lin, Cheng-Chieh	2017	Adult; Aged; Diabetes Mellitus; Type 2; Female; Humans; Male; Middle Aged; Parkinson Disease; Retrospective Studies; Risk Factors; Taiwan; Young Adult; complications; epidemiology; etiology	Asia	No	No	NA	NA	Control(n= 108, 882): 46.64% female ; Case (n=36, 294): 46.64% female	No	NA	No
338	Depression and Parkinson disease: prevalence, temporal relationship, and determinants.	Yapici Eser, Hale Bora, Hatice Ayşe Kuruoğlu, Aslı	2017	Aged; Aged; 80 and over; Comorbidity; Depression; Female; Health Surveys; Humans; Male; Middle Aged; Parkinson Disease; Prevalence; Psychiatric Status Rating Scales; Quality of Life; Risk Factors; Severity of Illness Index; Social Determinants of Health; Turkey; complications; diagnosis; epidemiology; etiology; psychology	Europe	No	No	NA	NA	Participants(n=55): 21F(38%) and 34M	No	NA	No
339	Association between Parkinson's disease and diabetes: Data from NEDICES study.	De Pablo-Fernandez, E Sierra-Hidalgo, F Benito-León, J Bermejo-Pareja, F	2017	Aged; Diabetes Mellitus; Female; Humans; Male; Parkinson Disease; Prevalence; Risk Factors; epidemiology	Europe	No	No	NA	NA	Participants(n=4998): 57.7% female.	No	NA	No
340	Air Pollution and Risk of Parkinson's Disease in a Large Prospective Study of Men.	Palacios, Natalia Fitzgerald, Kathryn C Hart, Jaime E Weisskopf, Marc Schwarzschild, Michael A Ascherio, Alberto Laden, Francine	2017	Adult; Aged; Air Pollutants; Air Pollution; Environmental Exposure; Humans; Male; Middle Aged; Parkinson Disease; Particulate Matter; Proportional Hazards Models; Risk Factors; analysis; epidemiology; statistics & numerical data	North America	No	Yes (as descriptives of the sample)	Described and combined with the total sample	91% caucasian	All male (n=51,529)	No	NA	Yes		Omitted race as the non-white (n) was too small, said that because this results might not be generalizable
341	Differences in Parkinson's Disease Risk with Caffeine Intake and Postmenopausal Hormone Use.	Kim, Iris Y O'Reilly, Éilis J Hughes, Katherine C Gao, Xiang Schwarzschild, Michael A Ascherio, Alberto	2017	Adult; Aged; Beverages; Caffeine; Contraceptives; Oral; Hormonal; Female; Humans; Longitudinal Studies; Male; Middle Aged; Parkinson Disease; Postmenopause; Risk Factors; Statistics as Topic; drug effects; epidemiology; metabolism; prevention & control; therapeutic use	North America	No	No	NA	NA	Study cohort: 90,254 female (NHS) and 47,474 men (HPFS)	No	NA	No
342	Genome-wide association study of Parkinson's disease in East Asians.	Foo, Jia Nee Tan, Louis C Irwan, Ishak D Au, Wing-Lok Low, Hui Qi Prakash, Kumar-M Ahmad-Annuar, Azlina Bei, Jinxin Chan, Anne Yy Chen, Chiung Mei Chen, Yi-Chun Chung, Sun Ju Deng, Hao Lim, Shen-Yang Mok, Vincent Pang, Hao Pei, Zhong Peng, Rong Shang, Hui-Fang Song, Kyuyoung Tan, Ai Huey Wu, Yih-Ru Aung, Tin Cheng, Ching-Yu Chew, Fook Tim Chew, Soo-Hong Chong, Siow-Ann Ebstein, Richard P Lee, Jim…	2017	Adult; Biomarkers; Case-Control Studies; Ethnic Groups; Far East; Female; Genetic Loci; Genetic Predisposition to Disease; Genome-Wide Association Study; Genotype; Humans; Male; Meta-Analysis as Topic; Middle Aged; Parkinson Disease; Polymorphism; Single Nucleotide; Risk Factors; analysis; epidemiology; genetics; metabolism	Asia	Yes (as factor)	Yes (as an integral part of the data analyses)	Each ethnoracial group was analysed distinctly	Han Chinese, Asian compared other east asian populations and to european SNP	Discovery in chinese population(taiwan) : Cases:(n=779): 58.3%M and Controls(n=13, 227): 49.5%M	Yes (as factor)	Yes	NA		Race was important because it's the first GWAS in a Han-Chinese population. Validation populations Hong Kong, Malaysia, Korea, mainland China and Taiwan
343	Characterization of patients with longstanding idiopathic REM sleep behavior disorder.	Iranzo, Alex Stefani, Ambra Serradell, Monica Martí, Maria Jose Lomeña, Francisco Mahlknecht, Philipp Stockner, Heike Gaig, Carles Fernández-Arcos, Ana Poewe, Werner Tolosa, Eduard Högl, Birgit Santamaria, Joan	2017	Aged; Aged; 80 and over; Brain; Brain Mapping; Dopamine Plasma Membrane Transport Proteins; Female; Follow-Up Studies; Humans; Male; Middle Aged; Parkinson Disease; Prodromal Symptoms; REM Sleep Behavior Disorder; Risk Factors; Severity of Illness Index; diagnosis; diagnostic imaging; metabolism; physiopathology	Europe	No	No	NA	NA	Control(n=32): 71.9% male ; Case(n=20): 80%M	No	NA	No
344	Moist smokeless tobacco (Snus) use and risk of Parkinson's disease.	Yang, Fei Pedersen, Nancy L Ye, Weimin Liu, Zhiwei Norberg, Margareta Forsgren, Lars Trolle Lagerros, Ylva Bellocco, Rino Alfredsson, Lars Knutsson, Anders Jansson, Jan-Håkan Wennberg, Patrik Galanti, Maria Rosaria Lager, Anton C J Araghi, Marzieh Lundberg, Michael Magnusson, Cecilia Wirdefeldt, Karin	2017	Aged; Aged; 80 and over; Follow-Up Studies; Humans; Male; Middle Aged; Multivariate Analysis; Parkinson Disease; Proportional Hazards Models; Prospective Studies; Risk Factors; Self Report; Sweden; Tobacco Use; Tobacco; Smokeless; epidemiology	Europe	No	No	NA	NA	All men (n= 348 601M)	No	NA	No
345	Association of Restless Legs Syndrome With Incident Parkinson's Disease.	Szatmari, Szabolcs Jr Bereczki, Daniel Fornadi, Katalin Kalantar-Zadeh, Kamyar Kovesdy, Csaba P Molnar, Miklos Z	2017	Aged; Comorbidity; Female; Follow-Up Studies; Humans; Incidence; Male; Middle Aged; Parkinson Disease; Prevalence; Proportional Hazards Models; Prospective Studies; Restless Legs Syndrome; Risk Factors; Veterans; epidemiology; statistics & numerical data	North America	No	Yes (as an integral part of the data analyses)	Each ethnoracial group was analysed distinctly	Cohort(n = 3481506): White (78%), African American(17%), hispanic, Other	Cohort(n = 3481506): 93% male	Yes (as factor)	No	NA
346	Polymorphism in MIR4697 but not VPS13C, GCH1, or SIPA1L2 is associated with risk of Parkinson's disease in a Han Chinese population.	Yang, Xinglong Zheng, Jinhua An, Ran Tian, Sijia Zhao, Quanzhen Chen, Yalan Huang, Hongyan Ning, Ping Ping Song, Yi Xu, Yanming	2017	China; Female; Genetic Association Studies; Genetic Markers; Genetic Predisposition to Disease; Humans; Male; MicroRNAs; Middle Aged; Parkinson Disease; Polymorphism; Single Nucleotide; Prevalence; Proteins; Reproducibility of Results; Risk Factors; Sensitivity and Specificity; diagnosis; epidemiology; ethnology; genetics	Asia	Yes (as target group of study is a racial/ethnic group	Yes (as target group of study is a racial/ethnic group)	Target group of study is a racial/ethnic group	Han Chinese	PD Patients(n=589): 329M, 260F and Controls(n=634): 365M, 269F	Yes (as target group of study is a racial/ethnic group	Yes and target group of study is a racial/ethnic group	NA		Authors wrote that race was important because they needed to corroborate other non-Asian data with the Asian population
347	Herpes zoster correlates with increased risk of Parkinson's disease in older people: A population-based cohort study in Taiwan.	Lai, Shih-Wei Lin, Chih-Hsueh Lin, Hsien-Feng Lin, Cheng-Li Lin, Cheng-Chieh Liao, Kuan-Fu	2017	Age Factors; Aged; Aged; 80 and over; Comorbidity; Female; Herpes Zoster; Humans; Incidence; Male; Parkinson Disease; Retrospective Studies; Risk Factors; Sex Factors; Taiwan; complications; epidemiology; virology	Asia	No	No	NA	NA	Herpes group(n=10,296): 50.1% female ; Non-Herpes group(n=39,405): 50.1%F	No	NA	No
348	Urinary Incontinence, Incident Parkinsonism, and Parkinson's Disease Pathology in Older Adults.	Buchman, Noa M Leurgans, Sue E Shah, Raj J VanderHorst, Veronique Wilson, Robert S Bachner, Yaacov G Tanne, David Schneider, Julie A Bennett, David A Buchman, Aron S	2017	Aged; Aged; 80 and over; Autopsy; Comorbidity; Female; Geriatric Assessment; Humans; Incidence; Longitudinal Studies; Male; Parkinson Disease; Parkinsonian Disorders; Risk Factors; United States; Urinary Incontinence; epidemiology	North America	No	No	NA	NA	Participants(n=2,617): Female: 73.5%	No	NA	No
349	Parkinson Disease and Melanoma: Confirming and Reexamining an Association.	Dalvin, Lauren A Damento, Gena M Yawn, Barbara P Abbott, Barbara A Hodge, David O Pulido, Jose S	2017	Aged; Female; Humans; Male; Melanoma; Minnesota; Models; Statistical; Parkinson Disease; Retrospective Studies; Risk Factors; Skin Neoplasms; epidemiology	North America	No	Yes (as descriptives of the sample)	Each ethnoracial group was analysed distinctly	White, Asian, Pacific Islander, American Indian PD cohort: all white, Melanoma cohort( Patients: 1540 whites, 2 Asians, 1 Pacific Islander, and 1 American Indian and Referents: 1542 white and 2 Asian)	PD cohort: Patients(n=974): 58%M and Referents(n=2922): 3 sex matched to 1 case. Melanoma cohort: Patients(1544): 52%M and Referent(n=1544): 1 sex matched to 1 case	Yes (as factor)	No	NA
350	Glaucoma correlates with increased risk of Parkinson's disease in the elderly: a national-based cohort study in Taiwan.	Lai, Shih-Wei Lin, Cheng-Li Liao, Kuan-Fu	2017	Aged; Aged; 80 and over; Cohort Studies; Comorbidity; Databases; Factual; Female; Glaucoma; Humans; Incidence; Male; National Health Programs; Parkinson Disease; Proportional Hazards Models; Retrospective Studies; Risk Factors; Taiwan; epidemiology	Asia	No	No	NA	NA	Glaucoma(n=4330): 54.2% female and Control(n=17,000): 54.6% female	No	NA	No
351	Occupational and recreational physical activity and Parkinson's disease in Denmark.	Shih, I-Fan Starhof, Charlotte Lassen, Christina Funch Hansen, Johnni Liew, Zeyan Ritz, Beate	2017	Age Factors; Aged; Case-Control Studies; Denmark; Exercise; Female; Humans; Leisure Activities; Male; Occupational Health; Parkinson Disease; Registries; Risk Factors; epidemiology; etiology; physiology	Europe	No	No	NA	NA	PD cases(n=1640): 60%M and Controls(n=1715): 60.6%M	No	NA	No
352	Impact of Sjogren's syndrome on Parkinson's disease: A nationwide case-control study.	Wu, Ming-Chi Xu, Xun Chen, Shan-Ming Tyan, Yeu-Sheng Chiou, Jeng-Yuan Wang, Yu-Hsun Lin, Li-Chi Chen, Chyong-Mei Wei, James Cheng-Chung	2017	Aged; Aged; 80 and over; Case-Control Studies; Female; Humans; Male; Odds Ratio; Parkinson Disease; Risk Factors; Sjogren's Syndrome; Taiwan; complications; epidemiology	Asia	No	Yes (as descriptives of the sample)	Described and combined with the total sample	ethnic asian	PD (n=7716): 50.5%F and and Controls(n=75129): 50.7%F	No	NA	No
353	Parkinson disease with and without Dementia: A prevalence study and future projections.	Savica, Rodolfo Grossardt, Brandon R Rocca, Walter A Bower, James H	2018	Adult; Age Factors; Aged; Aged; 80 and over; Community Health Planning; Cross-Sectional Studies; Dementia; Female; Humans; Incidence; Male; Middle Aged; Parkinson Disease; Prevalence; Psychiatric Status Rating Scales; Severity of Illness Index; Sex Factors; United States; complications; diagnosis; epidemiology	North America	No	No	NA	NA	PD: 187 men, 109 women	No	NA	No
354	Association of Parkinson's disease with industry sectors: a French nationwide incidence study.	Vlaar, Tim Kab, Sofiane Schwaab, Yannick Fréry, Nadine Elbaz, Alexis Moisan, Frédéric	2018	Adult; Aged; Agriculture; Female; France; Hazardous Substances; Humans; Industry; Male; Middle Aged; Occupational Diseases; Occupational Exposure; Parkinson Disease; Pesticides; Risk Factors; epidemiology; etiology; statistics & numerical data; toxicity	Europe	No	No	NA	NA	PD cases( n=112,625): 52.3% male	No	NA	No
355	Cardiac sympathetic denervation predicts PD in at-risk individuals.	Goldstein, David S Holmes, Courtney Lopez, Grisel J Wu, Tianxia Sharabi, Yehonatan	2018	Aged; Biomarkers; Dihydroxyphenylalanine; Female; Heart Septum; Heart Ventricles; Humans; Male; Middle Aged; Parkinson Disease; Positron-Emission Tomography; Prodromal Symptoms; Prospective Studies; Risk Factors; Sympathetic Nervous System; analogs & derivatives; diagnosis; diagnostic imaging; innervation; metabolism; physiopathology	North America	No	No	NA	NA	Controls(n=12): 9M and Pre-clincal PD group(n=4): 3M	No	NA	No
356	Association between diabetes and subsequent Parkinson disease: A record-linkage cohort study.	De Pablo-Fernandez, Eduardo Goldacre, Raph Pakpoor, Julia Noyce, Alastair J Warner, Thomas T	2018	Adult; Age Factors; Aged; Case-Control Studies; Comorbidity; Diabetes Mellitus; Type 2; England; Female; Humans; Male; Middle Aged; Parkinson Disease; Retrospective Studies; Risk Factors; epidemiology	Europe	No	No	NA	NA	T2D group(n=2,017,115):47% female	No	NA	No
357	Association of thiazolidinedione with a lower risk of Parkinson's disease in a population with newly-diagnosed diabetes mellitus.	Lin, Hsiu-Li Lin, Hsiu-Chen Tseng, Yuan-Fu Chao, Jane Chen-Jui Hsu, Chien-Yeh	2018	Adult; Aged; Aged; 80 and over; Case-Control Studies; Diabetes Mellitus; Dose-Response Relationship; Drug; Female; Humans; Hypoglycemic Agents; Incidence; Longitudinal Studies; Male; Middle Aged; Parkinson Disease; Risk Factors; Taiwan; Thiazolidinediones; Treatment Outcome; administration & dosage; drug therapy; epidemiology; prevention & control	Asia	No	No	NA	NA	Study cohort(n=38,521): 54%M and Controls: sex matched 1:1.	No	NA	No
358	Different Exposures to Risk Factors Do Not Explain the Inverse Relationship of Occurrence Between Cancer and Neurodegenerative Diseases: An Italian Nested Case-control Study.	Prinelli, Federica Adorni, Fulvio Leite, Maria Lea Correa Pettenati, Carla Russo, Antonio Di Santo, Simona Musicco, Massimo	2018	Aged; Alzheimer Disease; Case-Control Studies; Female; Humans; Italy; Male; Middle Aged; Neoplasms; Parkinson Disease; Risk Factors; epidemiology	Europe	No	No	NA	NA	AD/PD cases(N=54): 44.4 % female ; Cancer cases(N=347): 35.7% female	No	NA	No
359	Diagnostic exome sequencing in early-onset Parkinson's disease confirms VPS13C as a rare cause of autosomal-recessive Parkinson's disease.	Schormair, B Kemlink, D Mollenhauer, B Fiala, O Machetanz, G Roth, J Berutti, R Strom, T M Haslinger, B Trenkwalder, C Zahorakova, D Martasek, P Ruzicka, E Winkelmann, J	2018	Adult; Age of Onset; Alleles; DNA Mutational Analysis; Female; Genes; Recessive; Genetic Association Studies; Genetic Predisposition to Disease; Genetic Testing; Genotype; Humans; Male; Middle Aged; Mutation; Parkinson Disease; Pedigree; Proteins; Risk Factors; Sequence Analysis; DNA; Whole Exome Sequencing; Young Adult; diagnosis; genetics; methods	Europe	No	Yes (as target group of study is a racial/ethnic group)	Target group of study is a racial/ethnic group	European ancestry	Participants(n=80): Prague(n=49): 63.3%M and Germany(n=31): 67.8%M	Yes (as target group of study is a racial/ethnic group	Yes and target group of study is a racial/ethnic group	NA
360	Stroke and Coronary Artery Disease Are Associated With Parkinson's Disease.	Li, Qiongqiong Wang, Cheng Tang, Huidong Chen, Shengdi Ma, Jianfang	2018	Aged; Aged; 80 and over; Coronary Artery Disease; Cross-Sectional Studies; Female; Humans; Logistic Models; Male; Middle Aged; Parkinson Disease; Risk Factors; Stroke; Surveys and Questionnaires; complications; epidemiology	Asia	No	No	NA	NA	Malu rural district: PD(n=63): 54%M, Non-PD(n=4483): 42.5%M and Wuliqiao urban district: PD(n=62): 41.9%M, Non-PD(n=3553): 31.9%M	No	NA	No
361	Plasma α-synuclein and cognitive impairment in the Parkinson's Associated Risk Syndrome: A pilot study.	Wang, Hua Atik, Anzari Stewart, Tessandra Ginghina, Carmen Aro, Patrick Kerr, Kathleen F Seibyl, John Jennings, Danna Jensen, Poul Henning Marek, Kenneth Shi, Min Zhang, Jing	2018	Aged; Biomarkers; Cognitive Dysfunction; Cross-Sectional Studies; Female; Follow-Up Studies; Humans; Longitudinal Studies; Male; Middle Aged; Parkinson Disease; Pilot Projects; Risk Factors; alpha-Synuclein; blood; diagnosis; psychology	North America	No	No	NA	NA	Norosmia/-DAT reducton: (F/M)48/32 and Hyposmia/-DAT reduction: (F/M)67/66 and Hyposomia/+DAT reduction: (F/M)14/29	No	NA	No
362	Plasma urate and risk of Parkinson's disease: A mendelian randomization study.	Kobylecki, Camilla J Nordestgaard, Børge G Afzal, Shoaib	2018	Aged; Biomarkers; Female; Follow-Up Studies; Genetic Variation; Humans; Male; Mendelian Randomization Analysis; Middle Aged; Parkinson Disease; Prospective Studies; Risk Factors; Uric Acid; blood; diagnosis; genetics; methods	Europe	No	Yes (as descriptives of the sample)	Described and combined with the total sample	Danish descent	participants (n=106,703): 47955 males	No	NA	No
363	The epidemiology of Parkinson's disease in the Italian region Friuli Venezia Giulia: a population-based study with administrative data.	Valent, Francesca Devigili, Grazia Rinaldo, Sara Del Zotto, Stefania Tullio, Annarita Eleopra, Roberto	2018	Adolescent; Adult; Aged; Aged; 80 and over; Child; Child; Preschool; Databases; Factual; Female; Humans; Incidence; Infant; Italy; Male; Middle Aged; Parkinson Disease; Prevalence; Registries; Research Design; Young Adult; diagnosis; epidemiology; statistics & numerical data	Europe	No	No	NA	Italian?	Population(n=1,217,936): 628,175F and 589,761M	No	NA	No
364	Interaction between caffeine and polymorphisms of glutamate ionotropic receptor NMDA type subunit 2A (GRIN2A) and cytochrome P450 1A2 (CYP1A2) on Parkinson's disease risk.	Kim, Iris Y O'Reilly, Éilis J Hughes, Katherine C Gao, Xiang Schwarzschild, Michael A McCullough, Marjorie L Hannan, Marian T Betensky, Rebecca A Ascherio, Alberto	2018	Caffeine; Case-Control Studies; Cohort Studies; Cytochrome P-450 CYP1A2; Female; Gene Frequency; Genetic Predisposition to Disease; Genotype; Humans; Male; Parkinson Disease; Phosphodiesterase Inhibitors; Polymorphism; Single Nucleotide; Receptors; N-Methyl-D-Aspartate; Risk Factors; epidemiology; genetics; metabolism; prevention & control; therapeutic use	North America	Yes (as factor)	Yes (as a control variable/covariate the data analyses)	All ethnoracial groups other than White were considered together	White and Other	NHS: all women(n=121,700), HPFS: all men(n=51,529), CPS-IIN: 86404M, 97786F	Yes (as factor)	No	NA
365	Parkinson's disease and Alzheimer's disease: a Mendelian randomization study.	Han, Zhifa Tian, Rui Ren, Peng Zhou, Wenyang Wang, Pingping Luo, Meng Jin, Shuilin Jiang, Qinghua	2018	Aged; Alleles; Alzheimer Disease; Female; Gene Expression; Gene Frequency; Genome-Wide Association Study; Humans; Male; Mendelian Randomization Analysis; Nerve Tissue Proteins; Odds Ratio; Parkinson Disease; Polymorphism; Single Nucleotide; Risk Factors; alpha-Synuclein; diagnosis; genetics; physiopathology	Other	No	Yes (as descriptives of the sample)	Described and combined with the total sample	NA	NA	No	NA	No		GWAS data did not provide participant breakdown by sex
366	Integration of risk factors for Parkinson disease in 2 large longitudinal cohorts.	Kim, Iris Y O'Reilly, Éilis J Hughes, Katherine C Gao, Xiang Schwarzschild, Michael A Hannan, Marian T Betensky, Rebecca A Ascherio, Alberto	2018	Adult; Aged; Cohort Studies; Diet; Female; Humans; Life Style; Male; Middle Aged; Parkinson Disease; Risk; Risk Factors; Surveys and Questionnaires; epidemiology	North America	No	No	NA	NA	60% female- 69,968F and 45,830M	No	NA	No
367	Cognition among individuals along a spectrum of increased risk for Parkinson's disease.	Chahine, Lana M Urbe, Liz Caspell-Garcia, Chelsea Aarsland, Dag Alcalay, Roy Barone, Paolo Burn, David Espay, Alberto J Hamilton, Jamie L Hawkins, Keith A Lasch, Shirley Leverenz, James B Litvan, Irene Richard, Irene Siderowf, Andrew Coffey, Christopher S Simuni, Tanya Weintraub, Daniel	2018	Adult; Aged; Aged; 80 and over; Biomarkers; Cognition; Cohort Studies; Disease Susceptibility; Female; Humans; Male; Middle Aged; Mutation; Neuropsychological Tests; Parkinson Disease; Risk Assessment; Risk Factors; epidemiology; etiology; psychology	North America	No	No	NA	NA	PD cohort(n=423): 65% male ; RbD cohort(n=39): 85% male ; Hyposmia cohort(n=26): 69% male ; Non-PD muatation carriers(n=126):66%M https://www.ncbi.nlm.nih.gov/pmc/articles/PMC6101368/LRRK2 asymptomatic(n=88): 36% male ; GBA cohort(n=38): 29% male	No	NA	No
368	Tamoxifen usage correlates with increased risk of Parkinson's disease in older women with breast cancer: a case-control study in Taiwan.	Lin, Hsien-Feng Liao, Kuan-Fu Chang, Ching-Mei Lin, Cheng-Li Lai, Shih-Wei	2018	Aged; Breast Neoplasms; Case-Control Studies; Drug Prescriptions; Female; Humans; Incidence; Parkinson Disease; Random Allocation; Retrospective Studies; Risk Factors; Taiwan; Tamoxifen; administration & dosage; adverse effects; drug therapy; epidemiology; etiology; statistics & numerical data; therapeutic use	Asia	No	No	NA	NA	100% female (n=293)	No	NA	No
369	Projections of prevalence, lifetime risk, and life expectancy of Parkinson's disease (2010-2030) in France.	Wanneveich, Mathilde Moisan, Frédéric Jacqmin-Gadda, Hélène Elbaz, Alexis Joly, Pierre	2018	Age Factors; Aged; Aged; 80 and over; Disease Progression; Female; France; Humans; Incidence; Life Expectancy; Longitudinal Studies; Male; Middle Aged; National Health Programs; Parkinson Disease; Prevalence; Risk Factors; Sex Factors; epidemiology; mortality; physiopathology; psychology; statistics & numerical data; trends	Europe	No	No	NA	NA	Calculated (from smoothed prevalence rates and popualtion size) PD patients: 79,100F and 75,900M	No	NA	No
370	Tonsillectomy and risk of Parkinson's disease: A danish nationwide population-based cohort study.	Svensson, Elisabeth Henderson, Victor W Szépligeti, Szimonetta Stokholm, Morten Gersel Klug, Tejs Ehlers Sørensen, Henrik Toft Borghammer, Per	2018	Adolescent; Adult; Age Distribution; Case-Control Studies; Child; Child; Preschool; Cohort Studies; Community Health Planning; Denmark; Female; Humans; Infant; Infant; Newborn; Male; Parkinson Disease; Risk Factors; Tonsillectomy; Young Adult; adverse effects; epidemiology	Europe	No	No	NA	NA	Tonsillectomy cohort: 56% female and Matched comparison cohort: 56%F	No	NA	No
371	Does nephrotic syndrome without chronic kidney disease increase the risk of Parkinson's disease and secondary parkinsonism? A nationwide population-based study in Taiwan.	Huang, Zheng-Hao Chen, Hsiang-Cheng Chou, Yu-Ching Lin, Cheng-Li Kao, Chia-Hung Lo, Hsin-Yi Yang, Tse-Yen Liu, Feng-Cheng	2018	Adult; Aged; Case-Control Studies; Comorbidity; Databases; Factual; Female; Humans; Incidence; Male; Middle Aged; Nephrotic Syndrome; Parkinson Disease; Parkinson Disease; Secondary; Retrospective Studies; Risk Factors; Taiwan; Young Adult; epidemiology	Asia	No	Yes (as descriptives of the sample)	Described and combined with the total sample	Asian	Nephrotic syndrome cases(n=3663): 41.6%M and No nephrotic syndrome cases(n=14 652): 41.6%M	No	NA	No		" because our study included predominantly Asian patients, the results may not be generalisable to other ethnic populations"
372	β2-adrenoceptor agonists and antagonists and risk of Parkinson's disease.	Gronich, Naomi Abernethy, Darrell R Auriel, Eitan Lavi, Idit Rennert, Gad Saliba, Walid	2018	Adrenergic beta-Agonists; Adrenergic beta-Antagonists; Adult; Aged; Aged; 80 and over; Case-Control Studies; Cohort Studies; Electronic Health Records; Female; Humans; Israel; Male; Middle Aged; Parkinson Disease; Risk Factors; Young Adult; adverse effects; epidemiology; etiology; statistics & numerical data	Asia	Yes (as factor)	Yes (as a control variable/covariate the data analyses)	Each ethnoracial group was analysed distinctly	Jews( cases: 94.1% and Controls: 94.1%) vs Arabs ( cases: 5.9% and Controls: 5.9%) - controls matched to cases by ethnic groupr	Cases(n=11,314): 42.4% women ; Controls(n=113,140): 42.4% women	Yes (as factor)	No	NA
373	Association between physical fitness, cardiovascular risk factors, and Parkinson's disease.	Muller, Jan Myers, Jonathan	2018	Cardiovascular Diseases; Exercise Test; Exercise Therapy; Follow-Up Studies; Forecasting; Humans; Incidence; Male; Middle Aged; Parkinson Disease; Physical Fitness; Prognosis; Risk Factors; United States; Veterans; complications; epidemiology; etiology; methods; physiology; prevention & control; statistics & numerical data; therapy	North America	No	No	NA	NA	%100 male (n=7347)	No	NA	No
374	Association between Open-Angle Glaucoma and the Risks of Alzheimer's and Parkinson's Diseases in South Korea: A 10-year Nationwide Cohort Study.	Moon, Jong Youn Kim, Hyung Jun Park, Yoon Hyung Park, Tae Kwann Park, Eun-Cheol Kim, Chan Yun Lee, Si Hyung	2018	Age Factors; Aged; Aged; 80 and over; Alzheimer Disease; Chi-Square Distribution; Comorbidity; Databases; Factual; Female; Follow-Up Studies; Glaucoma; Open-Angle; Humans; Incidence; Male; Middle Aged; Multivariate Analysis; Parkinson Disease; Propensity Score; Proportional Hazards Models; Republic of Korea; Retrospective Studies; Risk; Risk Factors; Sex Factors; complications; diagnosis; epidemi…	Asia	Yes (as target group of study is a racial/ethnic group	Yes (as target group of study is a racial/ethnic group)	Target group of study is a racial/ethnic group	South Korean - named as ethnic group	With OAG(n=1469): 53.2% male ; Without OAG(n=7345): 52.9% male	Yes (as target group of study is a racial/ethnic group	Yes and target group of study is a racial/ethnic group	NA
375	Autoimmune rheumatic diseases and the risk of Parkinson disease: a nationwide population-based cohort study in Taiwan.	Chang, Chi-Ching Lin, Tzu-Min Chang, Yu-Sheng Chen, Wei-Sheng Sheu, Jau-Jiuan Chen, Yi-Hsuan Chen, Jin-Hua	2018	Aged; Aged; 80 and over; Arthritis; Rheumatoid; Autoimmune Diseases; Case-Control Studies; Cohort Studies; Comorbidity; Dopaminergic Neurons; Female; Humans; Inflammation; Male; Microglia; Middle Aged; Parkinson Disease; Retrospective Studies; Rheumatic Diseases; Risk Factors; Sjogren's Syndrome; Taiwan; complications; epidemiology; etiology; immunology; metabolism; pathology	Asia	Yes (as target group of study is a racial/ethnic group	Yes (as target group of study is a racial/ethnic group)	Target group of study is a racial/ethnic group	Taiwanese	control(n=138 424): 22.74% male ; Case(n=34 606): 22.74% male	Yes (as target group of study is a racial/ethnic group	Yes and target group of study is a racial/ethnic group	NA		" most of the subjects in our study were Taiwanese, which limited the generalization of the result to patients with other ethnicities"
376	Dental Scaling Decreases the Risk of Parkinson's Disease: A Nationwide Population-Based Nested Case-Control Study.	Chen, Chang-Kai Huang, Jing-Yang Wu, Yung-Tsan Chang, Yu-Chao	2018	Adult; Aged; Case-Control Studies; Dental Scaling; Female; Humans; Male; Middle Aged; Odds Ratio; Parkinson Disease; Periodontal Diseases; Retrospective Studies; Risk Factors; Taiwan; epidemiology; statistics & numerical data	Asia	No	No	NA	NA	Control(n=19 060): 50.49% female ; Case(n=4765): 50.59% female	No	NA	No
377	Metabolic syndrome and risk of Parkinson disease: A nationwide cohort study.	Nam, Ga Eun Kim, Seon Mee Han, Kyungdo Kim, Nan Hee Chung, Hye Soo Kim, Jin Wook Han, Byoungduck Cho, Sung Jung Yu, Ji Hee Park, Yong Gyu Choi, Kyung Mook	2018	Adult; Age Factors; Aged; Cohort Studies; Dyslipidemias; Female; Humans; Hyperglycemia; Hypertension; Hypertriglyceridemia; Incidence; Male; Metabolic Syndrome; Middle Aged; Multivariate Analysis; Obesity; Abdominal; Parkinson Disease; Proportional Hazards Models; Republic of Korea; Risk Factors; epidemiology	Asia	Yes (as target group of study is a racial/ethnic group	Yes (as target group of study is a racial/ethnic group)	Target group of study is a racial/ethnic group	South Korean	Without MetS cohort(n=11,315,052): 47.8% male ; MetS cohort(n=5,848,508): 47.9% male	Yes (as target group of study is a racial/ethnic group	Yes and target group of study is a racial/ethnic group	NA		"our findings from the Korean population cannot be extrapolated to other ethnicities"
378	Parkinson's disease across ethnicities: A nationwide study in New Zealand.	Pitcher, Toni L. Myall, Daniel J. Pearson, John F. Lacey Cameron J. Dalrymple-Alford John C. Anderson Tim J. MacAskill Micheal R.	2018	Aged; Aged; 80 and over; Alleles; Apolipoprotein E4; Asian Continental Ancestry Group; Case-Control Studies; European Continental Ancestry Group; Female; Genotype; Heterozygote; Hispanic Americans; Humans; Male; Middle Aged; Parkinson Disease; Polymorphism; Genetic; Risk Factors; ethnology; genetics	Oceania/Australasia	Yes (as factor)	Yes (as an integral part of the data analyses)	Each ethnoracial group was analysed distinctly	european, Maori, Pasifika, Asian ( breakdown by sandardized incidene and prevalence)	M:F ratio of standardized incidence, 1.8:1. Breakdown by n/% not provided	Yes (as factor)	Yes	NA
379	Higher serum cholesterol and decreased Parkinson's disease risk: A statin-free cohort study.	Rozani, Violetta Gurevich, Tanya Giladi, Nir El-Ad, Baruch Tsamir, Judith Hemo, Beatriz Peretz, Chava	2018	Adult; Age Factors; Aged; Algorithms; Antiparkinson Agents; Cholesterol; Cohort Studies; Community Health Planning; Female; Humans; Incidence; Male; Middle Aged; Parkinson Disease; Proportional Hazards Models; Risk Factors; Sex Factors; Time Factors; blood; drug therapy; epidemiology; therapeutic use	Other	No	No	NA	NA	Men: 111,894 ; Women: 149,744	No	NA	Yes		Reason for omission: data on ethniciy was not availabel from this data set
380	PBPK/PD assessment for Parkinson's disease risk posed by airborne pesticide paraquat exposure.	Cheng, Yi-Hsien Chou, Wei-Chun Yang, Ying-Fei Huang, Chi-Wei How, Chun Ming Chen, Szu-Chieh Chen, Wei-Yu Hsieh, Nan-Hung Lin, Yi-Jun You, Shu-Han Liao, Chung-Min	2018	Aged; Aged; 80 and over; Air Pollutants; Environmental Exposure; Humans; Middle Aged; Paraquat; Parkinson Disease; Pesticides; Prevalence; Risk Factors; Taiwan; analysis; epidemiology; etiology; toxicity	Asia	No	No	NA	NA	NA	No	NA	No		employed population risk model to predict PQ- induced PD prevalence - based on databse data of PD prevalence and incidnece where sex distribution was not provided
381	The vermiform appendix impacts the risk of developing Parkinson's disease.	Killinger, Bryan A Madaj, Zachary Sikora, Jacek W Rey, Nolwen Haas, Alec J Vepa, Yamini Lindqvist, Daniel Chen, Honglei Thomas, Paul M Brundin, Patrik Brundin, Lena Labrie, Viviane	2018	Age of Onset; Aged; Appendectomy; Appendix; Disease Progression; Humans; Middle Aged; Mutant Proteins; Parkinson Disease; Protein Aggregates; Risk Factors; Sweden; alpha-Synuclein; chemistry; epidemiology; etiology; metabolism; pathology; surgery	Europe	No	Yes (as a control variable/covariate the data analyses)	All ethnoracial groups other than White were considered together	PPMI study(n=849): White (87.04%)and Other (11.31%) and not specficied(1.65%) - for SNPR ethnicity data not provided	SNPR study: Appendectomy(n=551,647): 53.95%F and Controls (1, 146,353): 53.64%F. PPMI study(849): 42.17%F	Yes (as factor)	No	NA
382	Mild TBI and risk of Parkinson disease: A Chronic Effects of Neurotrauma Consortium Study.	Gardner, Raquel C Byers, Amy L Barnes, Deborah E Li, Yixia Boscardin, John Yaffe, Kristine	2018	Adult; Aged; Brain Concussion; Case-Control Studies; Cohort Studies; Female; Hospitals; Veterans; Humans; Male; Middle Aged; Neurologic Examination; Parkinson Disease; Risk Factors; United States; complications; epidemiology; etiology	North America	No	Yes (as an integral part of the data analyses)	Each ethnoracial group was analysed distinctly	No TBI: Non-hispanic white(67.03%), Non-hispanic black(17.88%), hispanic(1.07%), American Indian/Asian/Native Hawaiian(9.20%), Decline/Uknown (11.57%). Any TBI: Non-hispanic white(73.42%), Non-hispanic black(15.80%), hispanic(2.30%), American Indian/Asian/Native Hawaiian(2.89%), Decline/Uknown(5.58%)	No TBI(n=162,935): 15.09% female ; Any TBI(n=162,935): 8.31% female	Yes (as factor)	Yes	NA
383	Appendectomy and risk of Parkinson's disease in two large prospective cohorts of men and women.	Palacios, Natalia Hughes, Katherine C Cereda, Emanuele Schwarzschild, Michael A Ascherio, Alberto	2018	Adult; Aged; Appendectomy; Cohort Studies; Female; Humans; Incidence; Male; Middle Aged; Parkinson Disease; Proportional Hazards Models; Risk Factors; Self Report; Sex Characteristics; epidemiology; statistics & numerical data	North America	No	No	NA	NA	PD cases: 583F and 569M	No	NA	No
384	Occupational stress and risk for Parkinson's disease: A nationwide cohort study.	Sieurin, Johanna Andel, Ross Tillander, Annika Valdes, Elise G Pedersen, Nancy L Wirdefeldt, Karin	2018	Aged; Aged; 80 and over; Cohort Studies; Community Health Planning; Female; Humans; Male; Middle Aged; Occupational Stress; Parkinson Disease; Pulmonary Disease; Chronic Obstructive; Risk Factors; Sweden; complications; epidemiology; etiology	Europe	No	No	NA	NA	Study population(n=2,544,748): 53.4% male	No	NA	No
385	Body mass index, sitting time, and risk of Parkinson disease.	Roos, Elin Grotta, Alessandra Yang, Fei Bellocco, Rino Ye, Weimin Adami, Hans-Olov Wirdefeldt, Karin Trolle Lagerros, Ylva	2018	Adult; Aged; Body Mass Index; Cohort Studies; Exercise; Female; Humans; Life Style; Male; Middle Aged; Parkinson Disease; Proportional Hazards Models; Risk Factors; Sitting Position; Sweden; epidemiology; physiopathology	Europe	No	No	NA	NA	Participants(n=41,638): 35.8% male	No	NA	No
386	Pesticide use in agriculture and Parkinson's disease in the AGRICAN cohort study.	Pouchieu, Camille Piel, Clément Carles, Camille Gruber, Anne Helmer, Catherine Tual, Séverine Marcotullio, Elisabeth Lebailly, Pierre Baldi, Isabelle	2018	Adult; Aged; Aged; 80 and over; Agriculture; Animals; Cattle; Farmers; Female; France; Humans; Livestock; Logistic Models; Male; Middle Aged; Multivariate Analysis; Occupational Exposure; Parkinson Disease; Pesticides; Prospective Studies; Risk Factors; Self Report; adverse effects; analysis; epidemiology; statistics & numerical data	Europe	No	No	NA	NA	Study popualtion(n=149810): 55% men	No	NA	No
387	Rs2015 Polymorphism in miRNA Target Site of Sirtuin2 Gene Is Associated with the Risk of Parkinson's Disease in Chinese Han Population.	Chen, Xiongjin Mai, Hui Chen, Xiaoting Cai, Yujie Cheng, Qiufei Chen, Xiaoyi Li, Xiaohui Fan, Weihao Tang, Pei Ou, Mingqian Yang, Jingqi Chen, Yusen Cui, Lili	2019	3' Untranslated Regions; Aged; Asian Continental Ancestry Group; China; Female; Gene Expression Regulation; Enzymologic; Humans; Male; Middle Aged; Parkinson Disease; Polymorphism; Single Nucleotide; Risk Factors; Sirtuin 1; Sirtuin 2; Up-Regulation; biosynthesis; enzymology; ethnology; genetics	Asia	Yes (as target group of study is a racial/ethnic group	Yes (as target group of study is a racial/ethnic group)	Target group of study is a racial/ethnic group	Chinese Han	58% male. PD(n=222): 134M and 88F and Controls(n=161):89M and 72F	Yes (as target group of study is a racial/ethnic group	Yes and target group of study is a racial/ethnic group	NA
388	Parkinson's disease with orthostatic hypotension: analyses of clinical characteristics and influencing factors.	Li, Lixia Guo, Peng Ding, Duyu Lian, Tenghong Zuo, Lijun Du, Fenghe Zhang, Wei	2019	Aged; Blood Pressure; Female; Glycated Hemoglobin A; Humans; Hypotension; Orthostatic; Male; Middle Aged; Parkinson Disease; Risk Factors; analysis; complications; diagnosis; physiopathology	Asia	No	No	NA	NA	PD-OH Group(n=49): 59.18% male ; PD-NOH group(n=101): 48.51% male	No	NA	No
389	Associations between cerebrovascular risk factors and parkinson disease.	Kummer, Benjamin R Diaz, Iván Wu, Xian Aaroe, Ashley E Chen, Monica L Iadecola, Costantino Kamel, Hooman Navi, Babak B	2019	Aged; Aged; 80 and over; Alzheimer Disease; Cerebrovascular Disorders; Comorbidity; Female; Humans; Male; Parkinson Disease; Renal Colic; Retrospective Studies; Risk Factors; United States; epidemiology	North America	No	Yes (as a control variable/covariate the data analyses)	NA	NA	Case(n=15,531): 54.9% male ; Control(n=1,020,005): 40.6% male	Yes (as factor)	No	NA		Structural models ajusted fo race/ethnicity but breakdown not reported
390	Prevalence and incidence of Parkinson's disease and drug-induced parkinsonism in Korea.	Han, Sola Kim, Siin Kim, Hyungtae Shin, Hae-Won Na, Kyoung-Sae Suh, Hae Sun	2019	Aged; Cross-Sectional Studies; Databases; Factual; Female; Humans; Incidence; Male; Middle Aged; National Health Programs; Parkinson Disease; Parkinson Disease; Secondary; Prevalence; Republic of Korea; Retrospective Studies; diagnosis; epidemiology	Asia	Yes (as target group of study is a racial/ethnic group	Yes (as target group of study is a racial/ethnic group)	Target group of study is a racial/ethnic group	South Korean	NA - breakdown only reported by incidence and prevalence	Yes (as target group of study is a racial/ethnic group	Yes and target group of study is a racial/ethnic group	NA
391	Hepatitis B and C virus infection as a risk factor for Parkinson's disease in Israel-A nationwide cohort study.	Goldstein, Lilach Fogel-Grinvald, Haya Steiner, Israel	2019	Adolescent; Adult; Aged; Aged; 80 and over; Child; Child; Preschool; Cohort Studies; Female; Hepatitis B; Hepatitis C; Humans; Infant; Infant; Newborn; Israel; Male; Middle Aged; Parkinson Disease; Risk Factors; Young Adult; diagnosis; epidemiology	Asia	No	Yes (as descriptives of the sample)	NA	NA	NA ( prevalence of PD stratified by gender - no participant breakdown)	No	NA	No		talk about ethnic breakdown of population in which they sampled from
392	Brain Lewy-Type Synucleinopathy Density Is Associated with a Lower Prevalence of Atherosclerotic Cardiovascular Disease Risk Factors in Patients with Parkinson's Disease1.	Driver-Dunckley, Erika D Zhang, Nan Adler, Charles H Serrano, Geidy E Sue, Lucia I Shill, Holly A Mehta, Shyamal H Belden, Christine M Zamrini, Edward Y Davis, Kathryn Beach, Thomas G	2019	Aged; Aged; 80 and over; Arizona; Atherosclerosis; Brain; Carotid Artery Diseases; Female; Health Surveys; Humans; Lewy Bodies; Longitudinal Studies; Male; Middle Aged; Parkinson Disease; Prevalence; Risk Factors; Submandibular Gland; Sympathetic Nervous System; Synucleinopathies; epidemiology; metabolism; pathology	North America	No	No	NA	NA	Participants (n=150): 58M	No	NA	No
393	The association between Parkinson's disease and temporomandibular disorder.	Chen, Ya-Yi Fan, Hueng-Chuen Tung, Min-Che Chang, Yu-Kang	2019	Age Factors; Aged; Aged; 80 and over; Female; Humans; Male; Middle Aged; Models; Biological; Parkinson Disease; Prevalence; Risk Factors; Taiwan; Temporomandibular Joint Disorders; complications; epidemiology; genetics; physiopathology	Asia	No	No	NA	NA	Case(n=6185): 48.8% female ; Control(n=18,555): 48.4% female	No	NA	No
394	Cancers Preceding Parkinson's Disease after Adjustment for Bias in a Danish Population-Based Case-Control Study.	Cui, Xin Liew, Zeyan Hansen, Johnni Lee, Pei-Chen Arah, Onyebuchi A Ritz, Beate	2019	Adult; Aged; Bias; Case-Control Studies; Denmark; Female; Humans; Life Style; Male; Middle Aged; Neoplasms; Parkinson Disease; Population Surveillance; Registries; Risk Factors; diagnosis; epidemiology; methods	Europe	No	No	NA	NA	Case(n=1813): 59% male ; Control(n=1887): 59.4% male	No	NA	No
395	Regional transcriptional architecture of Parkinson's disease pathogenesis and network spread.	Freeze, Benjamin Pandya, Sneha Zeighami, Yashar Raj, Ashish	2019	Atrophy; Brain; Disease Progression; Female; Gene Expression; Genetic Predisposition to Disease; Humans; Magnetic Resonance Imaging; Male; Microglia; Middle Aged; Neuroimmunomodulation; Parkinson Disease; Risk Factors; Substantia Nigra; alpha-Synuclein; diagnostic imaging; genetics; metabolism; methods; pathology; physiology	North America	No	No	NA	NA	Control: 74M/43F ; Case: 155M/77F	No	NA	No
396	Trends in the incidence and prevalence of Parkinson's disease in Korea: a nationwide, population-based study.	Park, Joo-Hyun Kim, Do-Hoon Kwon, Do-Young Choi, Moonyoung Kim, Shinhye Jung, Jin-Hyung Han, Kyungdo Park, Yong-Gyu	2019	Age Distribution; Aged; Aged; 80 and over; Databases; Factual; Female; Humans; Incidence; Male; Middle Aged; Parkinson Disease; Prevalence; Registries; Republic of Korea; Risk Factors; Sex Distribution; diagnosis; epidemiology	Asia	Yes (as target group of study is a racial/ethnic group	Yes (as target group of study is a racial/ethnic group)	Target group of study is a racial/ethnic group	South Korean	PD patients: 31,164M and 42,562F	Yes (as target group of study is a racial/ethnic group	Yes and target group of study is a racial/ethnic group	NA
397	Chronic renal dysfunction, proteinuria, and risk of Parkinson's disease in the elderly.	Nam, Ga Eun Kim, Nan Hee Han, Kyungdo Choi, Kyung Mook Chung, Hye Soo Kim, Jin Wook Han, Byoungduck Cho, Sung Jung Jung, Seung Jin Yu, Ji Hee Park, Yong Gyu Kim, Seon Mee	2019	Aged; Female; Glomerular Filtration Rate; Humans; Incidence; Male; Multivariate Analysis; Parkinson Disease; Proportional Hazards Models; Proteinuria; Renal Insufficiency; Chronic; Republic of Korea; Risk Factors; Severity of Illness Index; epidemiology; metabolism	Asia	Yes (as target group of study is a racial/ethnic group	Yes (as target group of study is a racial/ethnic group)	Target group of study is a racial/ethnic group	South Korean	CKD(-) (n=2,986,991): 46.8% male ; CKD(+) (n=593, 444): 34.5% male	Yes (as target group of study is a racial/ethnic group	Yes and target group of study is a racial/ethnic group	NA
398	Incidence and Mortality of Parkinson's Disease in Estonia.	Kadastik-Eerme, Liis Taba, Nele Asser, Toomas Taba, Pille	2019	Aged; Aged; 80 and over; Estonia; Female; Humans; Incidence; Male; Middle Aged; Mortality; Parkinson Disease; diagnosis; epidemiology; mortality; psychology; trends	Europe	No	No	NA	NA	PD cases(n=388): 159M and 229F	No	NA	No
399	Incidence of Parkinson's disease in a large patient cohort with idiopathic smell and taste loss.	Haehner, Antje Masala, Carla Walter, Sophie Reichmann, Heinz Hummel, Thomas	2019	Adult; Aged; Aged; 80 and over; Case-Control Studies; Female; Humans; Incidence; Male; Middle Aged; Olfaction Disorders; Parkinson Disease; Prospective Studies; Taste Disorders; complications; diagnosis; epidemiology; etiology	Europe	No	No	NA	Na	PD(n=45): 51.1% female ; Non-PD(n=429): 54.8% female	No	NA	No
400	Revisiting the non-Gaucher-GBA-E326K carrier state: Is it sufficient to increase Parkinson's disease risk?	Goldstein, Orly Gana-Weisz, Mali Cohen-Avinoam, Danielle Shiner, Tamara Thaler, Avner Cedarbaum, Jesse M John, Sally Lalioti, Maria Gurevich, Tanya Bar-Shira, Anat Mirelman, Anat Giladi, Nir Orr-Urtreger, Avi	2019	Age of Onset; Alleles; Amino Acid Substitution; Female; Gene Frequency; Genetic Association Studies; Genetic Predisposition to Disease; Genotype; Glucosylceramidase; Humans; Jews; Male; Mutation; Odds Ratio; Parkinson Disease; Risk Assessment; Risk Factors; epidemiology; genetics	Asia	Yes (as target group of study is a racial/ethnic group	Yes (as target group of study is a racial/ethnic group)	Target group of study is a racial/ethnic group	Ashkenazi Jewish origin	Case: 476(39.7%) female ; Controls: 240 (63.5%) female	Yes (as target group of study is a racial/ethnic group	Yes and target group of study is a racial/ethnic group	NA
401	Use of β2-adrenoreceptor agonist and antagonist drugs and risk of Parkinson disease.	Hopfner, Franziska Wod, Mette Höglinger, Günter U Blaabjerg, Morten Rösler, Thomas W Kuhlenbäumer, Gregor Christensen, Kaare Deuschl, Günther Pottegård, Anton	2019	Administration; Inhalation; Adrenal Cortex Hormones; Adrenergic beta-Agonists; Adrenergic beta-Antagonists; Aged; Aged; 80 and over; Cholinergic Antagonists; Denmark; Duration of Therapy; Female; Humans; Male; Metoprolol; Middle Aged; Parkinson Disease; Propranolol; Protective Factors; Pulmonary Disease; Chronic Obstructive; Registries; Risk Factors; Smoking; epidemiology; therapeutic use	Europe	No	No	NA	NA	Case(n=2,790): 58.7% men ; Control(n=11,160): 58.7% men	No	NA	No
402	Lipids, Apolipoproteins, and the Risk of Parkinson Disease.	Fang, Fang Zhan, Yiqiang Hammar, Niklas Shen, Xia Wirdefeldt, Karin Walldius, Göran Mariosa, Daniela	2019	Adult; Apolipoproteins; Case-Control Studies; Cohort Studies; Female; Humans; Lipids; Male; Mendelian Randomization Analysis; Middle Aged; Parkinson Disease; Prospective Studies; Risk Factors; Sweden; blood; epidemiology; genetics; methods	Europe	No	Yes (as descriptives of the sample)	Each ethnoracial group was analysed distinctly	Mostly European and scandanavian	Participants: 313,044M and 297,097F	No	NA	No
403	Gout and the risk of Parkinson's disease in older adults: a study of U.S. Medicare data.	Singh, Jasvinder A Cleveland, John D	2019	Aged; Aged; 80 and over; Cardiovascular Diseases; Cohort Studies; Comorbidity; Female; Gout; Humans; Incidence; Male; Medicare; Parkinson Disease; Proportional Hazards Models; Retrospective Studies; Risk Factors; United States; epidemiology	North America	Yes (as factor)	Yes (as an integral part of the data analyses)	Each ethnoracial group was analysed distinctly	White(86.1%), Black (8.2%), Other (5.6%)	Cohort(n=1,725,833): 57.7% F	Yes (as factor)	No	NA
404	Altered Expression Levels of MicroRNA-132 and Nurr1 in Peripheral Blood of Parkinson's Disease: Potential Disease Biomarkers.	Yang, Zhaofei Li, Tianbai Li, Song Wei, Min Qi, Hongqian Shen, Bairong Chang, Raymond Chuen-Chung Le, Weidong Piao, Fengyuan	2019	Aged; Biomarkers; Disease Progression; Female; Humans; Male; MicroRNAs; Nuclear Receptor Subfamily 4; Group A; Member 2; Parkinson Disease; Risk Factors; Severity of Illness Index; Sex Factors; blood; diagnosis	Asia	No	Yes (as descriptives of the sample)	Described and combined with the total sample	Hanethnic Chinese	All subjects: 392M/275F	No	NA	No
405	Anemia in men and increased Parkinson's disease risk: A population-based large scale cohort study.	Rozani, Violetta Giladi, Nir Gurevich, Tanya El-Ad, Baruch Tsamir, Judith Hemo, Beatriz Peretz, Chava	2019	Adult; Aged; Anemia; Cohort Studies; Female; Humans; Incidence; Male; Middle Aged; Parkinson Disease; Risk Factors; Sex Characteristics; epidemiology	Asia	No	No	NA	NA	study cohort: Men n=224,948 ; Women: n=249,181	No	NA	Yes		Data on race/ethnicity wasn't available because they pulled from a large database, but they would've included it as a confounding variabel
406	Sleep and risk of parkinsonism and Parkinson's disease: a population-based study.	Lysen, Thom S Darweesh, Sirwan K L Ikram, M Kamran Luik, Annemarie I Ikram, M Arfan	2019	Aged; Comorbidity; Disease Progression; Female; Humans; Longitudinal Studies; Male; Middle Aged; Netherlands; Parkinson Disease; Parkinsonian Disorders; Prodromal Symptoms; Prospective Studies; Risk Factors; Sleep Wake Disorders; Time Factors; epidemiology	Europe	No	No	NA	Na	total sample(n=7726): 57% female	No	NA	No
407	Risk of Parkinson disease in Sjögren syndrome administered ineffective immunosuppressant therapies: A nationwide population-based study.	Ju, Uei-Han Liu, Feng-Cheng Lin, Chin-Sheng Huang, Wen-Yen Lin, Te-Yu Shen, Chih-Hao Chou, Yu-Ching Lin, Cheng-Li Lin, Kuen-Tze Kao, Chia-Hung Chen, Chao-Hsien Yang, Tse-Yen	2019	Adult; Aged; Anti-Inflammatory Agents; Antirheumatic Agents; Comorbidity; Female; Humans; Hydroxychloroquine; Immunosuppression; Incidence; Male; Methylprednisolone; Middle Aged; Muscarinic Agonists; National Health Programs; Parkinson Disease; Pilocarpine; Quinuclidines; Retrospective Studies; Risk Factors; Sjogren's Syndrome; Taiwan; Thiophenes; adverse effects; complications; diagnosis; drug t…	Asia	No	Yes (as descriptives of the sample)	Described and combined with the total sample	predominantly Asian	Sjogren group(n=12640): 89.1% female ; Non-sjogren group(n=50560): 89.1% female	No	NA	No		other ethnic popualtions (other than asian were not well represented in the study)
408	Concordance for Parkinson's disease in twins: A 20-year update.	Goldman, Samuel M Marek, Kenneth Ottman, Ruth Meng, Cheryl Comyns, Kathleen Chan, Piu Ma, Jinghong Marras, Connie Langston, J William Ross, G Webster Tanner, Caroline M	2019	Adult; Aged; Aged; 80 and over; Diseases in Twins; Female; Follow-Up Studies; Genetic Predisposition to Disease; Humans; Male; Middle Aged; Parkinson Disease; Registries; Risk Factors; Twins; Dizygotic; Twins; Monozygotic; epidemiology; genetics	North America	No	Yes (as descriptives of the sample)	Described and combined with the total sample	White	Male (n=233 pairs)	No	NA	No
409	Cardiovascular risk factors and Parkinson's disease in 500,000 Chinese adults.	Kizza, Jennifer Lewington, Sarah Mappin-Kasirer, Benjamin Turnbull, Iain Guo, Yu Bian, Zheng Chen, Yiping Yang, Ling Chen, Zhengming Clarke, Robert	2019	Adiposity; Adult; Aged; Body Mass Index; Cardiovascular Diseases; China; Diabetes Mellitus; Female; Humans; Hypertension; Incidence; Male; Middle Aged; Obesity; Parkinson Disease; Risk Factors; Stroke; complications; epidemiology; physiology	Asia	Yes (as target group of study is a racial/ethnic group	Yes (as target group of study is a racial/ethnic group)	Target group of study is a racial/ethnic group	Chinese - Asian population	Participants(n=503,497): 59.2% women	Yes (as target group of study is a racial/ethnic group	Yes and target group of study is a racial/ethnic group	NA		referred to as an asian population
410	Predicting diagnosis of Parkinson's disease: A risk algorithm based on primary care presentations.	Schrag, Anette Anastasiou, Zacharias Ambler, Gareth Noyce, Alastair Walters, Kate	2019	Aged; Aged; 80 and over; Algorithms; Female; Humans; Incidence; Male; Middle Aged; Parkinson Disease; Primary Health Care; Prodromal Symptoms; Risk Factors; Sensitivity and Specificity; diagnosis; epidemiology	Europe	No	No	NA	Na	Case(n=8,166): 59.5% male ; Control(n=46,755): 59.21% male	No	NA	No
411	Parkinson's disease determinants, prediction and gene-environment interactions in the UK Biobank.	Jacobs B, Belete D, Bestwick J, Blauwendraat C, Bandres-Ciga S, Heilbron K, Dobson R, Nalls M, Singleton A, Hardy J, Giovannoni G, Lees A, Schrag A, Noyce A	2020		Europe	No	Yes (as a control variable/covariate the data analyses)	All ethnoracial groups other than White were considered together	Models adjusted for ethnicity. Polygenic risk score determined with data from individuals with self reported "White British ethnicity" and European ancestry Controls: white:470670 (94.6%), Non-white: 26841 (5.4 %) Cases: white: 2039 (96.59 %), non-white: 72(3.41%)	Controls: F:272578 ( 54.47 %) and M:227819 ( 45.53 %) Cases: F:817 ( 38.41 %) M:1310 ( 61.59 %)	Yes (as factor)	Yes	NA	Could act as proxy for genetic differences	pop data breakdown in supplemental
412	Influence of Consanguinity and Medication on the Development of Parkinson's Disease.	Tufail M, Hassan I	2020		Asia	No	No	NA	NA	Not specified	No	NA	No
413	Milk and Fermented Milk Intake and Parkinson's Disease: Cohort Study.	Olsson E, Byberg L, Höijer J, Kilander L, Larsson S	2020		Europe	No	No	NA	NA	Total: 81,915 participants (36,664 women and 45,271 men) Glasses of Milk: <0.2 Female 8251 (45.4) Male 9929 (54.6) 0.2-0.8 Female 7207 (48.5) Male 7641 (51.5) 0.8-1.1 Female 9211 (51.4) Male 8706 (48.6) 1.1-2.0 Female 8042 (44.2) Male 10164 (55.8) <2.0 Female 3933 (30.8) Male 8831 (69.2)	No	NA	No
414	Alcohol intake and Parkinson's disease risk in the million women study.	Kim I, Yang T, Heath A, Simpson R, Reeves G, Green J, Floud S, Brown A, Hunter D, Beral V, Sweetland S	2020		Europe	No	No	NA	NA (in another source it was found that the population is 96% white)	All women	No	NA	No
415	Dietary Antioxidants and Risk of Parkinson's Disease in the Singapore Chinese Health Study.	Ying A, Khan S, Wu Y, Jin A, Wong A, Tan E, Yuan J, Koh W, Tan L	2020		Asia	Yes (as target group of study is a racial/ethnic group	Yes (as target group of study is a racial/ethnic group)	Target group of study is a racial/ethnic group	Ethnic Chinese cohort	Males PD: 275 (50.5) NPD: 26,534 (44.4) Females PD: 269 (49.4) NPD: 33,171 (55.6)	Yes (as target group of study is a racial/ethnic group	No and target group of study is a racial/ethnic group	NA
416	Body mass index, diabetes, and the risk of Parkinson's disease.	Jeong S, Han K, Kim D, Rhee S, Jang W, Shin D	2020		Asia	No	Yes (as target group of study is a racial/ethnic group)	Target group of study is a racial/ethnic group	Korean	Male 3,407,775 (50.1)	Yes (as target group of study is a racial/ethnic group	Yes and target group of study is a racial/ethnic group	NA		compared to studies done in white populations
417	Timed Up and Go Test and the Risk of Parkinson's Disease: A Nation-wide Retrospective Cohort Study.	Yoo J, Jang W, Shin D, Jeong S, Jung H, Youn J, Han K, Kim B	2020		Asia	No	No	NA	Not specified	Male 536,928 (44.9)	No	NA	No
418	Higher risk of Parkinson disease in patients with primary Sjögren's syndrome.	Hsu H, Hou T, Lin T, Chang Y, Chen W, Kuo P, Lin Y, Chang C, Chen J	2020		Asia	No	Yes (as descriptives of the sample)	Described and combined with the total sample	Asian	Male pSS: 1751 (10.28%) Comparator: 7127 (10.47%) Female pSS:15,277 (89.72%) Comparator:60,967 (89.53%)	No	NA	No
419	Well Water and Parkinson's Disease in Medicare Beneficiaries: A Nationwide Case-Control Study.	Silver M, Racette B, Dube U, Faust I, Searles Nielsen S	2020		North America	Yes (as factor)	Yes (as a control variable/covariate the data analyses)	Each ethnoracial group was analysed distinctly	White: Case 79,697 (88.8) Control 18,616,341 (86.4) Black Case 5,386 (6.0)Control 1,635,170 (7.6) Hispanic Case 1,904 (2.1) Control 399,355 (1.9) Asian Case 1,565 (1.7) Control 460,214 (2.1) Native American Case 285 (0.3) Control 92,978 (0.4) Pacific Islander/other Case 872 (1.0) Control 324,397 (1.5) Unknown Case 81 (0.1) Control 20,945 (0.1)	Male Case: 44,684 (49.8) Control: 9,287,842 (43.1) Female Case: 45,106 (50.2) Control: 12,261,500 (56.9)	Yes (as factor)	Yes	NA
420	Tinnitus and risk of Alzheimer's and Parkinson's disease: a retrospective nationwide population-based cohort study.	Chu H, Liang C, Yeh T, Hu L, Yang A, Tsai S, Shen C	2020		Asia	No	No	NA	NA	Male Tinnitus 6,028 (47.6%) Control: 12,056 (47.6%) Female Tinnitus 6,629 (52.4%) Control: 13,258 (52.4%)	No	NA	No
421	Alcohol Consumption and Risk of Parkinson's Disease: Data From a Large Prospective European	Peters S, Gallo V, Vineis P, Middleton L, Forsgren L, Sacerdote C, Sieri S, Kyrozis A, Chirlaque M, Zamora-Ros R, Hansson O, Petersson J, Katzke V, Kühn T, Mokoroa O, Masala G, Ardanaz E, Panico S, Bergmann M, Key T, Weiderpass E, Ferrari P, Vermeulen R	2020		Europe	No	No	NA	NA	Male: PD - 353, 51% NPD - 78,042, 37% Female: PD - 341, 49%NPD -131,262, 63%	No	NA	No
422	Risk of Parkinson's disease following gout: a population-based retrospective cohort study in Taiwan.	Hu L, Yang A, Lee SYou Z, Tsai S, Hu C, Shen C	2020	Gout, National Health Insurance Research Database, Parkinson disease	Asia	Yes (as target group of study is a racial/ethnic group	Yes (as target group of study is a racial/ethnic group)	Target group of study is a racial/ethnic group	Asian - Tawiwanese	Male: Gout - 5409, 83.9%, No Gout - 5409 83.9% Female: Gout - 2491, 16.1% 2491,16.1%	Yes (as target group of study is a racial/ethnic group	Yes and target group of study is a racial/ethnic group	NA
423	Visual Acuity and Development of Parkinson's Disease: A Nationwide Cohort Study.	Han G, Han J, Han K, Youn J, Chung T, Lim D	2020	nationwide cohort; Parkinson’s disease;visual acuity	Asia	No	No	NA	NA	Male: Control: 2,971,741 (49.26) PD: 10,729 (46.91)	No	NA	No
424	Application of a Simple Parkinson's Disease Risk Score in a Longitudinal Population-Based Cohort.	Marini K, Mahlknecht P, Tutzer F, Stockner H, Gasperi A, Djamshidian A, Willeit P, Kiechl S, Willeit J, Rungger G, Noyce A, Schrag A, Poewe W, Seppi K	2020	epidemiology; preclinical; prediagnostic;prodromal Parkinson’s disease; risk markers	Europe	No	No	NA	NA	Female:290 (53.7%)	No	NA	No
425	Distinct dopaminergic abnormalities in traumatic brain injury and Parkinson's disease.	Jenkins P, Roussakis A, De Simoni S, Bourke N, Fleminger J, Cole J, Piccini P, Sharp D	2020		Europe	No	No	NA	NA	Male: Control: 22 (71) REM Behavioural disorder: 6 (75) TBI: 38 (86) PD: 18 (69)	No	NA	No
426	Anemia and the risk of Parkinson's disease in Korean older adults: A nationwide population-based study.	Cho I, Shin D, Roh Y, Jang W, Cho J, Lee E, Ko H, Han K, Yoo J	2020		Asia	Yes (as target group of study is a racial/ethnic group	Yes (as target group of study is a racial/ethnic group)	Target group of study is a racial/ethnic group	Asian - Korean	Male: NPD - 1,409,588 (63.00), PD - 2,494 (64.88) Female: NPD - 827,687 (37.00) PD - 1,350 (35.12)	Yes (as target group of study is a racial/ethnic group	Yes and target group of study is a racial/ethnic group	NA
427	Sex differences in smoking, alcohol consumption, and risk of Parkinson's disease: A nationwide cohort study.	Kim R, Yoo D, Jung Y, Han K, Lee J	2020	Parkinson's disease Alcohol Smoking Sex Risk factor	Asia	Yes (as target group of study is a racial/ethnic group	Yes (as target group of study is a racial/ethnic group)	Target group of study is a racial/ethnic group	Korean	Male: 3,400,538 Female: 3,395,278. New PD Cases: Men -13,223 (0.39%) Women - 14,818 (0.44%)	Yes (as target group of study is a racial/ethnic group	Yes and target group of study is a racial/ethnic group	NA		Korean National Health Insurance Service (NHIS) mentioned needed to be validated in other ethnic populations
428	Parkinson Disease and Occupational and Environmental Exposure to Pesticides in a Region of Intense Agribusiness Activity in Brazil: A Case-Control Study.	Silvestre G, Ferreira M, Figueiredo S, Silva C, Siqueira H, Silva A	2020		South America	No	Yes (as descriptives of the sample)	All ethnoracial groups other than White were considered together	White: Case - 39 (45.88) Control - 85 (31.95) Others: Case - 46 (54.12) Control - 181 (68.05)	Female: Case - 31 (36.47) Control - 164 (61.89) Male: Case - 54 (63.53) Control -101 (38.11)	Yes (as factor)	No	NA
429	Tobacco smoking and the risk of Parkinson disease: A 65-year follow-up of 30,000 male British doctors.	Mappin-Kasirer B, Pan H, Lewington S, Kizza J, Gray R, Clarke R, Peto R	2020		Europe	No	No	NA	NA	All male	No	NA	No
430	Effect of family history, occupation and diet on the risk of Parkinson disease: A case-control study.	Torti M, Fossati C, Casali M, De Pandis M, Grassini P, Radicati F, Stirpe P, Vacca L, Iavicoli I, Leso V, Ceppi M, Bruzzone M, Bonassi S, Stocchi F	2020		Europe	No	No	NA	NA	Males: PD - 365 (57.6) Control- 261 (49.1) Females: PD - 269 (42.4) Control - 271 (50.9)	No	NA	No
431	Association Between Glycemic Status and the Risk of Parkinson Disease: A Nationwide Population-Based Study.	Rhee S, Han K, Kwon H, Park S, Park Y, Kim Y, Yoo S, Rhee E, Lee W	2020		Asia	No	No	NA	NA	Male: No diabtes - 2,249,965 (44.78) IFG - 1,190,543 (56.42) Diabtes <5years - 445,971 (59.16) Diabetes >=5 years 296,079 (53.42)	No	NA	No
432	Association Between Burning Mouth Syndrome and the Development of Depression, Anxiety, Dementia, and Parkinson Disease.	Kim J, Kim Y, Ko I, Kim D	2020		Asia	No	No	NA	NA	Male: Comparison - 446 (38.1) Patient - 226 (38.6) Female Comparison - 726 (61.9) Patient - 360 (61.4)	No	NA	No
433	Positive association of Parkinson's disease with ankylosing spondylitis: a nationwide population-based study.	Yeh F, Chen H, Chou Y, Lin C, Kao C, Lo H, Liu F, Yang T	2020	Ankylosing spondylitis (AS), Parkinson’s disease (PD), Immunology, National health insurance research database (NHIRD), Retrospective cohort	Asia	No	No	NA	NA	Male: Ankylosing spondylitis No- 12,396 (48.1) Yes - 3099 (48.1) Female: Ankylosing spondylitis No - 13,364 (51.9) Yes - 3341 (51.9)	No	NA	No
434	Mild Parkinsonian Signs in a Community Ambulant Population.	Aye Y, Liew G, Ng S, Wen M, Lim L, Chua S, Chotphoksap U, Chao Y, Ng A, Tan E, Tan L, Xu Z	2020	Mild parkinsonian signs, REM sleep behavior disorder (RBD), premotor symptoms	Asia	No	No	NA	NA	Male: No MPS - 80 (27.9%) MPS - 40 (38.1%) Female: No MPS - 207 (71.2%) MPS - 65 (61.9%)	No	NA	No
435	Late-life falling and depressive symptoms associated with the risk of Parkinson's disease: a nationwide cohort data analysis.	Jung Y, Kim R, Yoo D, Han K, Lee J	2020	Falling, Depression, Parkinson’s disease	Asia	No	No	NA	NA	Male 474,284 (47.0) Female 533,908 (53.0)	No	NA	No
436	Association of Circadian Abnormalities in Older Adults With an Increased Risk of Developing Parkinson Disease.	Leng Y, Blackwell T, Cawthon P, Ancoli-Israel S, Stone K, Yaffe K	2020		North America	No	Yes (as a control variable/covariate the data analyses)	All ethnoracial groups other than White were considered together	White (2636 [90.0%]).	All male	Yes (as factor)	Yes	NA
437	Midbrain hyperechogenicity, hyposmia, mild parkinsonian signs and risk for incident Parkinson's disease over 10 years: A prospective population-based study.	Mahlknecht P, Stockner H, Marini K, Gasperi A, Djamshidian A, Willeit P, Kiechl S, Willeit J, Rungger G, Poewe W, Seppi K	2020	Keywords: Prodromal Parkinson's disease Preclinical Prediagnostic Risk markers Epidemiology	Europe	No	No	NA	NA	At baseline M/F 249/290	No	NA	No
438	Occupational pesticide exposure and the risk of death in patients with Parkinson's disease: an observational study in southern Brazil.	Schneider Medeiros M, P Reddy S, P Socal M, Schumacher-Schuh A, Mello Rieder C	2020	Pesticides, Parkinson, Mortality, Occupational exposure, Environmental exposure	South America	No	Yes (as a control variable/covariate the data analyses)	All ethnoracial groups other than White were considered together	White: 91.4%	Females 81 (54%)	Yes (as factor)	Yes	NA
439	High IQ in Early Adulthood Is Associated with Parkinson's Disease.	Fardell C, Torén K, Schiöler L, Nissbrandt H, Åberg M	2020	Parkinson’s disease, IQ, cognition, smoking, education	Europe	No	No	NA	NA	All male	No	NA	No
440	Neuroticism, Smoking, and the Risk of Parkinson's Disease.	Sieurin J, Zhan Y, Pedersen N, Wirdefeldt K	2021		Europe	Yes (as target group of study is a racial/ethnic group	Yes (as target group of study is a racial/ethnic group)	Target group of study is a racial/ethnic group	European ancestry	Not specified	Yes (as target group of study is a racial/ethnic group	Yes and target group of study is a racial/ethnic group	NA
441	Genetically Predicted Milk Intake and Risk of Neurodegenerative Diseases.	Zhang Z, Wang M, Yuan S, Larsson S, Liu X	2021		Europe	No	Yes (as descriptives of the sample)	Described and combined with the total sample	European ancestry	Not specified	Yes (as factor)	Yes	NA
442	Drug-induced Parkinsonism: A strong predictor of idiopathic Parkinson's disease.	Jeong S, Cho H, Kim Y, Ma H, Jang S	2021		Asia	No	No	NA	NA	Total Male: 783 (35.51) Female: 1422 (64.49)	No	NA	No
443	Long-term Risk of Parkinson Disease Following Influenza and Other Infections.	Cocoros N, Svensson E, Szépligeti S, Vestergaard S, Szentkúti P, Thomsen R, Borghammer P, Sørensen H, Henderson V	2021		Europe	No	No	NA	NA	Male: PD - 6300 (61.3) Control - 31 500 (61.3) Female: PD - 3971 (38.7) Control - 19 855 (38.7)	No	NA	No
444	Frailty and Prodromal Parkinson's Disease: Results From the HELIAD Study.	Ntanasi E, Maraki M, Yannakoulia M, Stamelou M, Xiromerisiou G, Kosmidis M, Dardiotis E, Hadjigeorgiou G, Sakka P, Gargalionis A, Patas K, Chatzipanagiotou S, Charisis S, Stefanis L, Scarmeas N	2021		Europe	No	No	NA	NA	Male: PD free - 683 (40.6) Possible Prodormal PD 22 (44.9) PD18 (52.9)	No	NA	No
445	Epidemiology of Parkinson's Disease in Rural Gujarat, India.	Je G, Arora S, Raithatha S, Barrette R, Valizadeh N, Shah U, Desai D, Deb A, Desai S	2021	Epidemiology Parkinson’s disease Prevalence India	Asia	No	No	NA	NA	Male 9,738 (51.5) Female 9,158 (48.5)	No	NA	No
446	Association between depression and risk of Parkinson's disease in South Korean adults.	Jeong W, Kim H, Joo J, Jang S, Park E	2021		Asia	No	No	NA	NA	Male 6,942 (31.9) Female 14,808 (68.1)	No	NA	No
447	Metabolic Syndrome and Parkinson's Disease Incidence: A Nationwide Study Using Propensity Score Matching.	Roh J, Lee S, Yoon J	2021	metabolic syndrome, Parkinson’s disease, risk, cohort, propensity score matching	Asia	No	No	NA	NA	Men: 47,964 (56.1) Women: 37,566 (43.9)	No	NA	No
448	Polygenic Risk Scores in a Prospective Parkinson's Disease Cohort.	Sia M, Foo J, Saffari S, Wong A, Khor C, Yuan J, Tan E, Koh W, Tan L	2021	Parkinson’s disease; prospectivecohort; polygenic risk score; neurogenetics	Asia	Yes (as target group of study is a racial/ethnic group	Yes (as target group of study is a racial/ethnic group)	Target group of study is a racial/ethnic group	Asian ( ethnic singapore chinese)	Males PD: 166(49.8) and controls: 11456(45.3) Females PD:167(50.2) and controls:13857(54.7)	Yes (as target group of study is a racial/ethnic group	Yes and target group of study is a racial/ethnic group	NA
449	Increased risk of Parkinson's disease among patients with age-related macular degeneration.	Chen P, Wan L, Lai J, Chen C, Chen J, Yen W, Chiu L, Hu K, Tien P, Lin H	2021	Parkinson’s disease (PD), Age-related macular degeneration (AMD), Retinal infammation	Asia	No	No	NA	NA	Female: Age related macular degeneration - 5130 (49.2) Non Age related Macular degeneration - 5130 (49.2 Male: Age related macular degeneration - 5294 (50.8) Non age related macular degeneration -5294 50.8	No	NA	No
450	Association Between Microscopic Colitis and Parkinson's Disease in a Swedish Population.	Kang X, Ploner A, Roelstraete B, Khalili H, Williams D, Pedersen N, Ludvigsson J, Wirdefeldt K	2021		Europe	No	No	NA	NA	Women (%) MC-Free: 72.9 Patients with MC 72.6 Patients with CC 77.0 Patients with LC 70.3	No	NA	No
451	Heart rate, intelligence in adolescence, and Parkinson's disease later in life.	Longinetti E, Zhan Y, Sata M, Larsson H, D Onofrio B, Iso H, Wirdefeldt K, Fang F	2021	Parkinson’s disease · Epidemiology · Risk factor · Early-life exposure · Cohort study	Europe	No	Yes (as descriptives of the sample)	Described and combined with the total sample	Scandinavian ethnic group and European ancestry	all male and 47.2% male	Yes (as factor)	Yes	NA
452	Osteoporosis and the Risk of Parkinson's Disease: A Nationwide, Propensity Score-Matched, Longitudinal Follow-up Study.	Feng S, Huang Y, Yeh K, Pan S	2021	osteoporosis, Parkinson’s disease, risk factor, bone mineral density	Asia	No	No	NA	NA	Female: Osteoporosis - 18 786 (80.0) Comparison - 19 149 (81.5)	No	NA	No
453	Increased Menopausal Age Reduces the Risk of Parkinson's Disease: A Mendelian Randomization Approach.	Kusters C, Paul K, Duarte Folle A, Keener A, Bronstein J, Bertram L, Hansen J, Horvath S, Sinsheimer J, Lill C, Ritz B	2021	Parkinson’s disease; females; menopause;menarche; Mendelian randomization	Other	Yes (as target group of study is a racial/ethnic group	Yes (as target group of study is a racial/ethnic group)	Target group of study is a racial/ethnic group	European ancestry	Men: 2430 Women: 1737	Yes (as target group of study is a racial/ethnic group	Yes and target group of study is a racial/ethnic group	NA
454	Clinical Association between Gout and Parkinson's Disease: A Nationwide Population-Based Cohort Study in Korea.	Kim J, Choi I, Kim A, Kang G	2021	gout; uric acid; Parkinson’s disease	Asia	No	Yes (as target group of study is a racial/ethnic group)	Target group of study is a racial/ethnic group	Asian	Male: Gout - 304,162 Control -304,162 Female Gout - 22,998 Control - 22,998	Yes (as target group of study is a racial/ethnic group	Yes and target group of study is a racial/ethnic group	NA
455	Association between body weight variability and incidence of Parkinson disease: A nationwide, population-based cohort study.	Park J, Choi Y, Kim H, Nam M, Lee C, Yoo J, Jung J, Park Y, Han K, Kim D	2021	body mass index, body weight variability, Parkinson disease	Asia	No	Yes (as descriptives of the sample)	Described and combined with the total sample	Asian	66.8% men Male Q1 body weight - 564,766 (62.6) Q2 - 301,903 (65.1) Q3 - 518,531 (71.2) Q4 - 495,231 (68.7)	Yes (as factor)	No	NA
456	Sex differences in the association between nonalcoholic fatty liver disease and Parkinson's disease.	Jeong S, Lee H, Jang W, Kim D, Yoo J, Jeon KJin S, Han K, Shin D	2021		Asia	No	Yes (as target group of study is a racial/ethnic group)	Target group of study is a racial/ethnic group	Korean	Men: 46.9%	Yes (as target group of study is a racial/ethnic group	Yes and target group of study is a racial/ethnic group	NA
457	Increased functional connectivity in a population at risk of developing Parkinson's disease.	Binder T, Hobert M, Pfrommer T, Leks E, Granert O, Weigl B, Ethofer T, Erb M, Wilke M, Maetzler W, Berg D	2021	Functional MRI Prodromal state Risk factors Putamen Parkinson’s disease	Europe	No	No	NA	NA	Men/Women (female %): HC - 10/10 (50) HRPD - 8/12 (60) PD - 12/4 (25)	No	NA	No
458	Association of High-Density Lipoprotein Cholesterol Variability and the Risk of Developing Parkinson Disease.	Park J, Lee C, Nam M, Kim H, Kwon D, Yoo J, Lee K, Han K, Jung J, Park Y, Kim D	2021		Asia	No	No	NA	NA	Male: Q1 HDL-C: 58,940 (62.0) Q2: 58,962 (62.0) Q3: 58,941 (62.0) Q4: 58,951 (62.0)	No	NA	NA
459	Ten-Year Relative Survival From the Diagnosis of Parkinson's Disease: A Nationwide Database Study.	Seo H, Byun S, Oh B, Park S	2021	Parkinson's disease survival rate nationwide database	Asia	No	No	NA	NA	Men: 38.26%	No	NA	No
460	The mortality rate of Parkinson's disease and related comorbidities: a nationwide population-based matched cohort study in Korea.	Yoon S, Shin J, Kim Y, Chang J, Won Kim H	2021	Parkinson’s disease, mortality, comorbidities, cohort study, older people,	Asia	No	Yes (as target group of study is a racial/ethnic group)	Target group of study is a racial/ethnic group	Asian	Male comparison:8802 (38.17) PD:978 (38.17) Female comparison:14256(61.83) PD:1584(61.83)	Yes (as target group of study is a racial/ethnic group	Yes and target group of study is a racial/ethnic group	NA
461	Fasting plasma glucose variability in midlife and risk of Parkinson's disease: A nationwide population-based study.	Chung H, Lee J, Kim J, Roh E, Lee Y, Hong S, Yu J, Kim N, Yoo H, Seo J, Kim S, Kim N, Baik S, Choi K	2021	glycemic variability, visit-to-visit, fasting plasma glucose, Parkinson’s disease, midlife	Asia	Yes (as target group of study is a racial/ethnic group	Yes (as target group of study is a racial/ethnic group)	Target group of study is a racial/ethnic group	Korean	Male: Under 65: Q1 fasting plasma 13773 (49.0) Q2: 16117 (57.4) Q3: 17056 (60.7) Q4: 17894 (63.7) Over 65 Q1: 2269 (48.2) Q2: 2464 (49.9) Q3: 2534 (52.6) Q4: 2578 (53.5)	Yes (as target group of study is a racial/ethnic group	Yes and target group of study is a racial/ethnic group	NA
462	The association between multiple risk factors, clinical correlations and molecular insights in Parkinson's disease patients from Tamil Nadu population, India.	Venkatesan D, Iyer M, S R, G L, Vellingiri B	2021	Parkinson’s disease (PD) Lifestyle Environment Biomarkers MT-ND1 PD progression	Asia	Yes (as target group of study is a racial/ethnic group	Yes (as target group of study is a racial/ethnic group)	Target group of study is a racial/ethnic group	Indian/South Asian	Male: PD - 48 (65.7 %) Control - 48 (65.7 %) Female PD - 25 (34.2 %) Control - 25 (34.2 %)	Yes (as target group of study is a racial/ethnic group	No and target group of study is a racial/ethnic group	NA
463	Assessment of LIN28A variants in Parkinson's disease in large European cohorts.	Diez-Fairen M, Makarious M, Bandres-Ciga S, Blauwendraat C	2021	Parkinson's disease Risk factor LIN28A Loss of function	Other	Yes (as target group of study is a racial/ethnic group	Yes (as target group of study is a racial/ethnic group)	Target group of study is a racial/ethnic group	White European descent	Not specified	Yes (as target group of study is a racial/ethnic group	Yes and target group of study is a racial/ethnic group	NA
464	Characteristic of Parkinson's disease with severe COVID-19: a study of 10 cases from Wuhan.	Zhai H, Lv Y, Xu Y, Wu Y, Zeng W, Wang T, Cao X, Xu Y	2021	Parkinson’s disease · COVID-19 · SARS-CoV-2 · Clinical characteristics · Clinical outcomes	Asia	No	No	NA	NA	Male: 150 (50.68%) Female: 146 (49.32%)	No	NA	No
465	The erythrocyte sedimentation rate in male adolescents and subsequent risk of Parkinson's disease: an observational study.	Fardell C, Schiöler L, Nissbrandt H, Torén K, Åberg M	2021	Parkinson’s disease Infammation Erythrocyte sedimentation rate Adolescence Population	Europe	No	No	NA	NA	All male	No	NA	No
466	Diabetes Mellitus is Associated with a Higher Relative Risk for Parkinson's Disease in Women than in Men.	Deischinger C, Dervic E, Kaleta M, Klimek P, Kautzky-Willer A	2021	Diabetes mellitus, Parkinson’s disease, women’s health, sex differences	Europe	No	No	NA	NA	Female: Diabtetes - 69,518 Control - 208,705 Male: Diabetes - 107,797 Control - 322,975	No	NA	No
467	Association of Dynamic Changes in Metabolic Syndrome Status with the Risk of Parkinson's Disease: A Nationwide Cohort Study.	Park S, Nam G, Han K, Huh Y, Kim W, Lee M, Koh E, Kim E, Kim M, Kwon H, Kim S, Cho K, Park Y	2021		Asia	No	Yes (as descriptives of the sample)	Described and combined with the total sample	Korean	Male: Non-MS 1,561,273 (51.7) Improves MS: 286,450 (55.4) Incident MS: 357,758 (54.0) Persistent MS: 639,108 (48.4)	Yes (as factor)	Yes	NA
468	Regulatory rare variants of the dopaminergic gene ANKK1 as potential risk factors for Parkinson's disease.	Pérez-Santamarina E, García-Ruiz P, Martínez-Rubio D, Ezquerra M, Pla-Navarro I, Puente J, Martí M, Palau F, Hoenicka J	2021		Europe	No	Yes (as a control variable/covariate the data analyses)	Described and combined with the total sample	Ethnically matched controls	Madrid: 45M , 26 F Barcelona: 157M, 107F	Yes (as factor)	No	NA
469	Geospatial analysis of individual-based Parkinson's disease data supports a link with air pollution: A case-control study.	Fleury V, Himsl R, Joost S, Nicastro N, Bereau M, Guessous I, Burkhard P	2021	Parkinson’s disease Epidemiology Prevalence Environment Spatial dependence Air pollution	Europe	No	No	NA	NA	Not specified	No	NA	No
470	Assessment of Risk Factors and Early Presentations of Parkinson Disease in Primary Care in a Diverse UK Population.	Simonet C, Bestwick J, Jitlal M, Waters S, Ben-Joseph A, Marshall C, Dobson R, Marrium S, Robson J, Jacobs B, Belete D, Lees A, Giovannoni G, Cuzick J, Schrag A, Noyce A	2022		Europe	Yes (as factor)	Yes (as an integral part of the data analyses)	Each ethnoracial group was analysed distinctly	Patients: 15.7% Black, 19.7% South Asian, 50.9% White, and 8.3% other, 5.3% unknown; controls: 13.3% Black, 21.5% South Asian, 43.7% White, and 11.3% other, 10.1% unknown	Female:PD 423 (40.1) Control: 492 661 (48.8) Male: PD: 632 (59.9) Control: 516 862 (51.2)	Yes (as factor)	Yes	NA
471	Retinal age gap as a predictive biomarker of future risk of Parkinson's disease.	Hu W, Wang W, Wang Y, Chen Y, Shang X, Liao H, Huang Y, Bulloch G, Zhang S, Kiburg K, Zhang X, Tang S, Yu H, Yang X, He M, Zhu Z	2022		Europe	No	Yes (as a control variable/covariate the data analyses)	All ethnoracial groups other than White were considered together	White: 33,400 (93.2) Other: 2,434 (6.79)	Female: 19,969 (55.7) Male: 15,865 (44.3)	Yes (as factor)	Yes	NA
472	Risk of Parkinson Disease and Secondary Parkinsonism in Myocardial Infarction Survivors.	Sundbøll J, Szépligeti S, Szentkúti P, Adelborg K, Horváth-Puhó E, Pedersen L, Henderson V, Sørensen H	2022		Europe	No	No	NA	NA	Male: Myocardial Infarction: 112362(61.7) Comparison: 561795 (61.7)	No	NA	No
473	Glucocerebrosidase variant T369M is not a risk factor for Parkinson's disease in Sweden.	Ran C, Brodin L, Gellhaar S, Westerlund M, Fardell C, Nissbrandt H, Söderkvist P, Sydow O, Markaki I, Hertz E, Wirdefeldt K, Svenningsson P	2022	GBA Gaucher disease Lysosome Genetic rs75548401 Thr408Met Parkinson’s disease	Europe	No	No	NA	NA	Patient male: 62.2%, Control group 1 male: 42.8%, Control group 2: 55.4% male	No	NA	No
474	Revisiting the Association Between Inflammatory Bowel Disease and Parkinson's Disease.	Coates M, Ba D, Liu G, Dalessio S, Leslie D, Huang X	2022	inflammatory bowel disease, Parkinson’s disease, population-based cohort study	North America	No	No	NA	NA	Male: HAC - 78 329 (50.85) IBD - 75 646 (49.10) Female: HAC - 75 722 (49.15) IBD - 78 405 (50.90)	No	NA	Yes
475	Risk of Parkinson's disease in a gout Mediterranean population: A case-control study.	Pou M, Orfila F, Pagonabarraga J, Ferrer-Moret S, Corominas H, Diaz-Torne C	2022	Gout Hyperuricemia Parkinson’s disease	Europe	No	No	NA	NA	Male: 39,075 (44.3)	No	NA	No
476	Insights on Genetic and Environmental Factors in Parkinson's Disease from a Regional Swedish Case-Control Cohort.	Brolin K, Bandres-Ciga S, Blauwendraat C, Widner H, Odin P, Hansson O, Puschmann A, Swanberg M	2022	Parkinson’s disease, Sweden, case-control studies, risk factors, genome-wide association study, haplotypes	Europe	No	Yes (as descriptives of the sample)	Described and combined with the total sample	Swedish Ancestry : Patients - 810 (87.9%) Control - 793 (86.1%) Not Swedish Ancestry: Patients - 112 (12.1%) Control - 128 (13.9%)	Men: Patients - 599 (64.5%) Control - 598 (64.0%) Women - 330 (35.5%) 337 (36.0%)	Yes (as factor)	Yes	NA
477	Dietary fat intake and risk of Parkinson disease: results from the Swedish National March Cohort.	Hantikainen E, Roos E, Bellocco R, D'Antonio A, Grotta A, Adami H, Ye W, Trolle Lagerros Y, Bonn S	2022	Diet Energy intake Epidemiology Fatty acids Parkinson disease	Europe	No	No	NA	NA	Male: 14 843 (35.7)	No	NA	No
478	The risk of Parkinson's disease according to diabetic kidney disease status in a Korean population.	Lee S, Yoo J, Choi H, Han K, Kim K	2022		Asia	Yes (as target group of study is a racial/ethnic group	Yes (as target group of study is a racial/ethnic group)	Target group of study is a racial/ethnic group	Korean	Male: PU− GFR-: 1,115,261 (60.40) PU+GFR− 75,543 (67.47) PU− GFR+99,175 (44.29) PU+GFR+20,322 (57.90)	Yes (as target group of study is a racial/ethnic group	Yes and target group of study is a racial/ethnic group	NA
479	Predicting Parkinson's Disease and Its Pathology via Simple Clinical Variables.	Karabayir I, Butler L, Goldman SKamaleswaran R, Gunturkun F, Davis R, Ross G, Petrovitch H, Masaki K, Tanner C, Tsivgoulis G, Alexandrov A, Chinthala L, Akbilgic O	2022	Parkinson’s disease, Lewy body pathology, neuron density, machine learning	North America	No	Yes (as descriptives of the sample)	Described and combined with the total sample	Japanese- American	All men	Yes (as factor)	Yes	NA
480	Lifestyle Factors and Parkinson Disease Risk: Korean Nationwide Cohort Study With Repeated Health Screening Data.	Yoon S, Park Y, Lee H, Kang D, Kim Y	2022		Asia	No	No	NA	NA	Male: PD - 1,327 (49.79) Comparison: 245,821 (54.23) Female: PD - 1,338 (50.21) Comparison: 207,453 (45.77)	No	NA	No
481	Mortality of Parkinson's disease in Italy from 1980 to 2015.	Ulivelli M, Bezzini D, Kundisova L, Grazi I, Battaglia M, Nante N, Rossi S	2022	Parkinson’s disease Mortality Levodopa Dopamine agonists Pesticides Death certifcate	Europe	No	No	NA	NA	Males 2,016,254,356, Females 2,138,813,986	No	NA	No
482	Irritable bowel syndrome and subsequent risk of Parkinson's disease: a nationwide population-based matched-cohort study.	Yoon SShin J, Heo S, Chang J, Sunwoo M, Kim Y	2022	Parkinson’s disease Irritable bowel syndrome Non-motor symptoms Cohort study	Asia	No	No	NA	NA	Males: Comparison - 96,813 (45.40) IBS - 32,271 (45.40) Females: Comparison: 116,445 (54.60) PD : 38,815 (54.60)	No	NA	No
483	Obsessive-Compulsive Disorder and Risk of Parkinson Disease: A Nationwide Longitudinal Study.	Liou Y, Bai Y, Chen M, Cheng C, Chen T, Tsai S	2022	obsessive-compulsive disorder, Parkinson disease, Taiwan National Health Insurance Research Database.	Asia	No	No	NA	NA	Males: OCD - 14,041 (48.9) Controls - 140,410 (48.9) Females: OCD - 14,681 (51.1) Controls- 146,810 (51.1)	No	NA	No
484	Association between serum lipid levels over time and risk of Parkinson's disease.	Hurh K, Park M, Jang S, Park E, Jang S	2022		Asia	No	Yes (as target group of study is a racial/ethnic group)	Target group of study is a racial/ethnic group	Asian	Male 113,577 (56.7) Female 86,877 (43.3)	Yes (as target group of study is a racial/ethnic group	Yes and target group of study is a racial/ethnic group	NA
485	Incidence of Parkinson's disease in French women from the E3N cohort study over 27 years of follow-up.	Canonico M, Artaud F, Degaey I, Moisan F, Kabore R, Portugal B, Nguyen T, Pesce G, Boutron-Ruault M, Roze E, Elbaz A	2022	Parkinson’s disease Women Cohort Incidence Medical records Drug claims	Europe	No	No	NA	NA	All women	No	NA	No
486	Independent and Joint Associations of Tea Consumption and Smoking with Parkinson's Disease Risk in Chinese Adults.	Nie J, Liu C, Yu C, Guo Y, Pei P, Yang L, Chen Y, Du H, Zhu K, Schmidt D, Avery D, Chen J, Chen Z, Lv J, Li L	2022		Asia	No	No	NA	NA	Females: Smoking (-) & tea (-) 90.2% Smoking (+) tea(-) 13.3% Smoking (-) tea (+) 80.1% Smoking (+) tea(+) 4.4%	No	NA	No
487	Prevalence of Parkinson's Disease in Adults Aged 65 Years and Older in China: A Multicenter Population-Based Survey.	Song Z, Liu S, Li X, Zhang M, Wang X, Shi Z, Ji Y	2022	Parkinson's disease, Prevalence, China, Elderly	Asia	No	No	NA	NA	Men: PD:75/Total:3,542 Women: PD:76/Total:4,582	No	NA	No
488	Sleep and affective disorders in relation to Parkinson's disease risk among older women from the Women's Health Initiative.	Beydoun H, Chen J, Saquib N, Naughton M, Beydoun M, Shadyab A, Hale L, Zonderman A	2022	Affective Anxiety Depression Sleep Parkinson's disease	North America	No	Yes (as a control variable/covariate the data analyses)	Each ethnoracial group was analysed distinctly	White: 41,558 (76.96) Black: 2431 (4.50) Asian: 8707 (16.13) Other: 1300 (2.41)	All women	Yes (as factor)	Yes	NA
489	Associations of Young Adult Intelligence, Education, Height, and Body Mass Index with Subsequent Risk of Parkinson's Disease and Survival: A Danish Cohort Study.	Osler M, Okholm G, Villumsen M, Rozing M, Jørgensen T	2022	Parkinson's disease. survival, early living conditions. cohort study	Europe	No	No	NA	NA	All men	No	NA	No
490	Coffee, smoking and aspirin are associated with age at onset in idiopathic Parkinson's disease.	Gabbert C, König I, Lüth T, Kolms B, Kasten M, Vollstedt E, Balck A, Grünewald A, Klein C, Trinh J	2022	Parkinson’s disease Age at onset Modifers Lifestyle Environment	North America	No	Yes (as descriptives of the sample)	Described and combined with the total sample	PD: White/Caucasian: 32,332 (89.9%) Black/African American: 369 (1.0%) American Indian/Alaska Native: 393 (1.1%) Asian: 691 (1.9%) Native Hawaiian/Other Pacific Islander: 47 (0.1%) Hispanic/Latino/Spanish Origin: 1,692 (4.7%)	Male:18,349 (51.0%) Female: 14,528 (40.4%)	No	No	NA
491	Association of sleep disturbance with Parkinson disease: evidence from the Women's Health Initiative.	Beydoun H, Naughton M, Beydoun M, Shadyab A, Brunner R, Chen J, Espeland M, Shumaker S, Zonderman A	2022	Cohort Insomnia Menopause Parkinson disease Sleep Women	North America	No	Yes (as a control variable/covariate the data analyses)	Each ethnoracial group was analysed distinctly	Black 11,121 8.52% White 109,766 84.11% Latina 4,540 3.48% Asian 3,630 2.78% Othera 1,445 1.11%	All women	Yes (as factor)	No	NA
492	Association of serum cholesterol with Parkinson's disease in a cohort of statin-free individuals.	Lv Y, Xu B, Zhang X, Chen C, Gao Y, Li N	2022	association, low-density lipoprotein statin, Parkinson’s disease, serum cholesterol, statin	Asia	No	No	NA	NA	Male PD - 291 (52.0) Control - 288 (53.3) Female PD - 269 (48.0) Control - 252 (46.7)	No	NA	No
493	Widening the Spectrum of Risk Factors, Comorbidities, and Prodromal Features of Parkinson Disease.	Schrag A, Bohlken J, Dammertz L, Teipel S, Hermann W, Akmatov M, Bätzing J, Holstiege J	2023		Europe	No	No	NA	NA	Female Cases: 64625 (46.7) Controls: 129250 (46.7) Male: Cases: 73720 (53.3) Controls 147440 (53.3)	No	NA	No
494	Blood Markers of Inflammation, Neurodegeneration, and Cardiovascular Risk in Early Parkinson's Disease.	Bartl M, Dakna M, Schade S, Otte B, Wicke T, Lang E, Starke M, Ebentheuer J, Weber S, Toischer K, Schnelle M, Sixel-Döring F, Trenkwalder C, Mollenhauer B	2023		Unknown	No	No	NA	NA	Female PD: 39 (35.8%) Control: 37 (38.5%) Male PD: 70 (64.2%) Control: 59 (61.5%)	No	NA	No
495	Identification and validation of neurotrophic factor-related gene signatures in glioblastoma and Parkinson's disease.	Zhao S, Chi H, Yang Q, Chen S, Wu C, Lai G, Xu K, Su K, Luo H, Peng G, Xia Z, Cheng C, Lu P	2023		Other	No	No	NA	NA	Not specified	No	NA	No
496	Body Mass Index, Abdominal Adiposity, and Incidence of Parkinson Disease in French Women From the E3N Cohort Study.	Portugal B, Artaud F, Domenighetti C, Roze E, Degaey I, Canonico M, Elbaz A	2023		Europe	No	No	NA	NA	All women	No	NA	No
497	The burden of Parkinson's disease in the Middle East and North Africa region, 1990-2019: results from the global burden of disease study 2019.	Safiri SNoori M, Nejadghaderi S, Mousavi S, Sullman M, Araj-Khodaei M, Singh K, Kolahi A, Gharagozli K	2023	Parkinson’s disease, Middle East and North Africa, Epidemiology, Mortality, Disability-adjusted life-years	Other	No	No	NA	NA	Not specified	No	NA	No

## Sheet: Percent of Articles
Was race/ethnicity accounted for in the data?	Count of Was race/ethnicity accounted for in the data?			Percent of Articles
No	272		0.547284	54.7284
Yes (as a control variable/covariate the data analyses)	46		0.0925553	9.25553
Yes (as an integral part of the data analyses)	22		0.0442656	4.42656
Yes (as descriptives of the sample)	63		0.126761	12.6761
Yes (as target group of study is a racial/ethnic group)	94		0.189135	18.9135
